# Supplementary material
Source: PubMed Central journal article supplement (PMC3493622)
Supplement: NIHMS415151-supplement-ESI.pdf [file NIHMS415151-supplement-ESI.pdf]

# Synthesis of 2-arylindole derivatives and evaluation as nitric oxide synthase and NFκB inhibitors

Xufen Yu, Eun-Jung Park, Tamara P. Kondratyuk, John M. Pezzuto, and Dianqing Sun\*

*Department of Pharmaceutical Sciences, College of Pharmacy, University of Hawai'i at Hilo, Hilo, HI 96720, USA*

[dianqing@hawaii.edu](mailto:dianqing@hawaii.edu).

## Supporting Information

### Table of Contents

|                                                                                         |    |
|-----------------------------------------------------------------------------------------|----|
| <sup>1</sup> H NMR, <sup>13</sup> C NMR and HPLC spectra of compound <b>2a</b> .....    | 3  |
| <sup>1</sup> H NMR, <sup>13</sup> C NMR and HPLC spectra of compound <b>2b</b> .....    | 5  |
| <sup>1</sup> H NMR, <sup>13</sup> C NMR and HPLC spectra of compound <b>2b'</b> .....   | 7  |
| <sup>1</sup> H NMR, <sup>13</sup> C NMR and HPLC spectra of compound <b>2c</b> .....    | 9  |
| <sup>1</sup> H NMR, <sup>13</sup> C NMR and HPLC spectra of compound <b>2d</b> .....    | 11 |
| <sup>1</sup> H NMR, <sup>13</sup> C NMR and HPLC spectra of compound <b>2e</b> .....    | 13 |
| <sup>1</sup> H NMR, <sup>13</sup> C NMR and HPLC spectra of compound <b>2e'</b> .....   | 15 |
| <sup>1</sup> H NMR, <sup>13</sup> C NMR and HPLC spectra of compound <b>2f</b> .....    | 17 |
| <sup>1</sup> H NMR, <sup>13</sup> C NMR and HPLC spectra of compound <b>3</b> .....     | 19 |
| <sup>1</sup> H NMR, <sup>13</sup> C NMR and HPLC spectra of compound <b>5</b> .....     | 21 |
| <sup>1</sup> H NMR, <sup>13</sup> C NMR and HPLC spectra of compound <b>6a</b> .....    | 23 |
| <sup>1</sup> H NMR, <sup>13</sup> C NMR and HPLC spectra of compound <b>6b</b> .....    | 25 |
| <sup>1</sup> H NMR, <sup>13</sup> C NMR and HPLC spectra of compound <b>7</b> .....     | 27 |
| <sup>1</sup> H NMR, <sup>13</sup> C NMR and HPLC spectra of compound <b>10aa</b> .....  | 29 |
| <sup>1</sup> H NMR, <sup>13</sup> C NMR and HPLC spectra of compound <b>10ab</b> .....  | 31 |
| <sup>1</sup> H NMR, <sup>13</sup> C NMR and HPLC spectra of compound <b>10ac</b> .....  | 33 |
| <sup>1</sup> H NMR, <sup>13</sup> C NMR and HPLC spectra of compound <b>10ad</b> .....  | 35 |
| <sup>1</sup> H NMR, <sup>13</sup> C NMR and HPLC spectra of compound <b>10ae</b> .....  | 37 |
| <sup>1</sup> H NMR, <sup>13</sup> C NMR and HPLC spectra of compound <b>10ae'</b> ..... | 39 |
| <sup>1</sup> H NMR, <sup>13</sup> C NMR and HPLC spectra of compound <b>10af</b> .....  | 41 |
| <sup>1</sup> H NMR, <sup>13</sup> C NMR and HPLC spectra of compound <b>10ag</b> .....  | 43 |
| <sup>1</sup> H NMR, <sup>13</sup> C NMR and HPLC spectra of compound <b>10ah</b> .....  | 45 |
| <sup>1</sup> H NMR, <sup>13</sup> C NMR and HPLC spectra of compound <b>10ai</b> .....  | 47 |

|                                                                                        |    |
|----------------------------------------------------------------------------------------|----|
| <sup>1</sup> H NMR, <sup>13</sup> C NMR and HPLC spectra of compound <b>10aj</b> ..... | 49 |
| <sup>1</sup> H NMR, <sup>13</sup> C NMR and HPLC spectra of compound <b>10ak</b> ..... | 51 |
| <sup>1</sup> H NMR, <sup>13</sup> C NMR and HPLC spectra of compound <b>10al</b> ..... | 53 |
| <sup>1</sup> H NMR, <sup>13</sup> C NMR and HPLC spectra of compound <b>10an</b> ..... | 55 |
| <sup>1</sup> H NMR, <sup>13</sup> C NMR and HPLC spectra of compound <b>10ao</b> ..... | 57 |
| <sup>1</sup> H NMR, <sup>13</sup> C NMR and HPLC spectra of compound <b>10ap</b> ..... | 59 |
| <sup>1</sup> H NMR, <sup>13</sup> C NMR and HPLC spectra of compound <b>10aq</b> ..... | 61 |
| <sup>1</sup> H NMR, <sup>13</sup> C NMR and HPLC spectra of compound <b>10as</b> ..... | 63 |
| <sup>1</sup> H NMR, <sup>13</sup> C NMR and HPLC spectra of compound <b>10at</b> ..... | 65 |
| <sup>1</sup> H NMR, <sup>13</sup> C NMR and HPLC spectra of compound <b>10ba</b> ..... | 67 |
| <sup>1</sup> H NMR, <sup>13</sup> C NMR and HPLC spectra of compound <b>10bb</b> ..... | 69 |
| <sup>1</sup> H NMR, <sup>13</sup> C NMR and HPLC spectra of compound <b>10ca</b> ..... | 71 |
| <sup>1</sup> H NMR, <sup>13</sup> C NMR and HPLC spectra of compound <b>10da</b> ..... | 73 |
| <sup>1</sup> H NMR, <sup>13</sup> C NMR and HPLC spectra of compound <b>10ea</b> ..... | 75 |
| <sup>1</sup> H NMR, <sup>13</sup> C NMR and HPLC spectra of compound <b>10fa</b> ..... | 77 |
| <sup>1</sup> H NMR, <sup>13</sup> C NMR and HPLC spectra of compound <b>10ga</b> ..... | 79 |
| <sup>1</sup> H NMR, <sup>13</sup> C NMR and HPLC spectra of compound <b>10ha</b> ..... | 81 |

$^1\text{H}$  NMR,  $^{13}\text{C}$  NMR and HPLC spectra of compound 2a

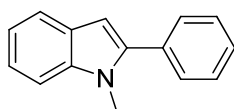

**2a**

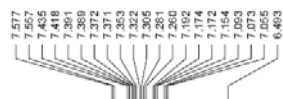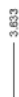

YXF-1-1-I-P

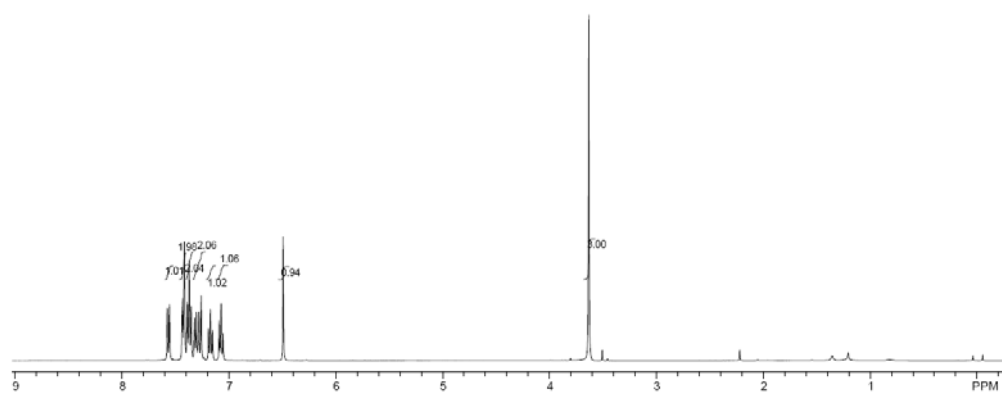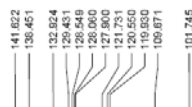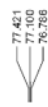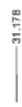

YXF-1-1-P-C13

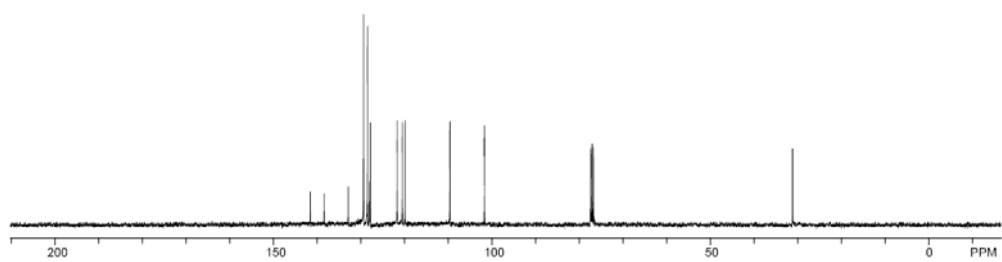

### ==== Shimadzu LcSolution Analysis Report ====

C:\LabSolutions\LcSolution\Sun\YXF\YXF-1-1-I-P.lcd  
 Sample Name : YXF-1-1-I-P  
 Tray# : 1  
 Vial # : 31  
 Injection Volume : 5 uL  
 Data File Name : YXF-1-1-I-P.lcd  
 Method File Name : SDQ.gradient.lcm  
 Batch File Name :  
 Data Acquired : 8/31/2011 11:31:15 AM

#### <Chromatogram>

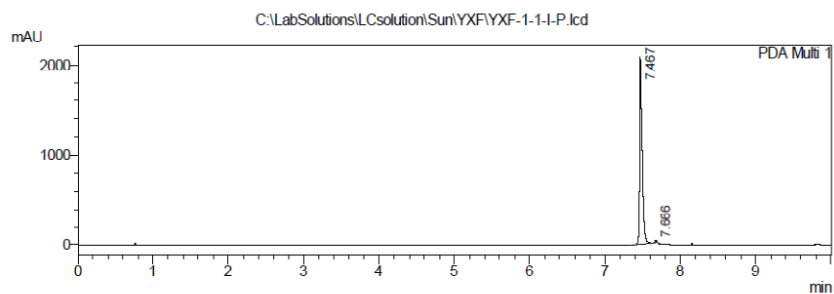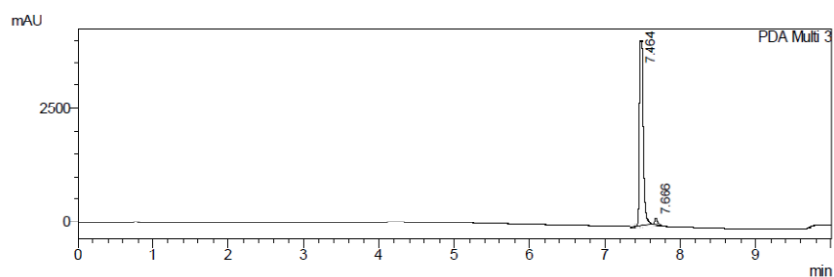

- 1 PDA Multi 1/254nm 4nm  
 2 PDA Multi 3/220nm 4nm

PeakTable

PDA Ch1 254nm 4nm

| Peak# | Ret. Time | Area    | Height  | Area %  | Height % |
|-------|-----------|---------|---------|---------|----------|
| 1     | 7.467     | 5446037 | 2050866 | 98.746  | 98.307   |
| 2     | 7.666     | 69149   | 35318   | 1.254   | 1.693    |
| Total |           | 5515186 | 2086184 | 100.000 | 100.000  |

PeakTable

PDA Ch3 220nm 4nm

| Peak# | Ret. Time | Area     | Height  | Area %  | Height % |
|-------|-----------|----------|---------|---------|----------|
| 1     | 7.464     | 15955714 | 4086355 | 97.648  | 96.256   |
| 2     | 7.666     | 384265   | 158926  | 2.352   | 3.744    |
| Total |           | 16339980 | 4245281 | 100.000 | 100.000  |

C:\LabSolutions\LcSolution\Sun\YXF\YXF-1-1-I-P.lcd

<sup>1</sup>H NMR, <sup>13</sup>C NMR and HPLC spectra of compound 2b

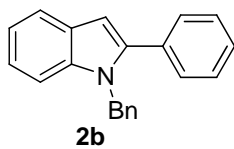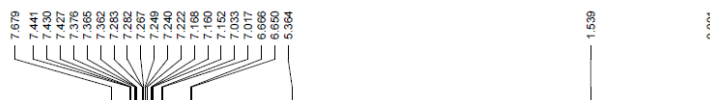

YXF-1-2-II-P(2b)

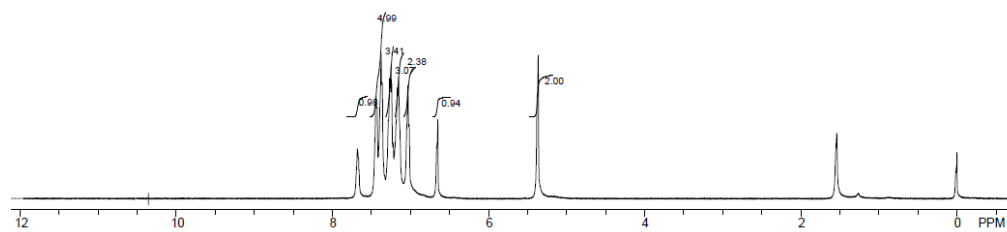

YXF-1-2-II-P-C13

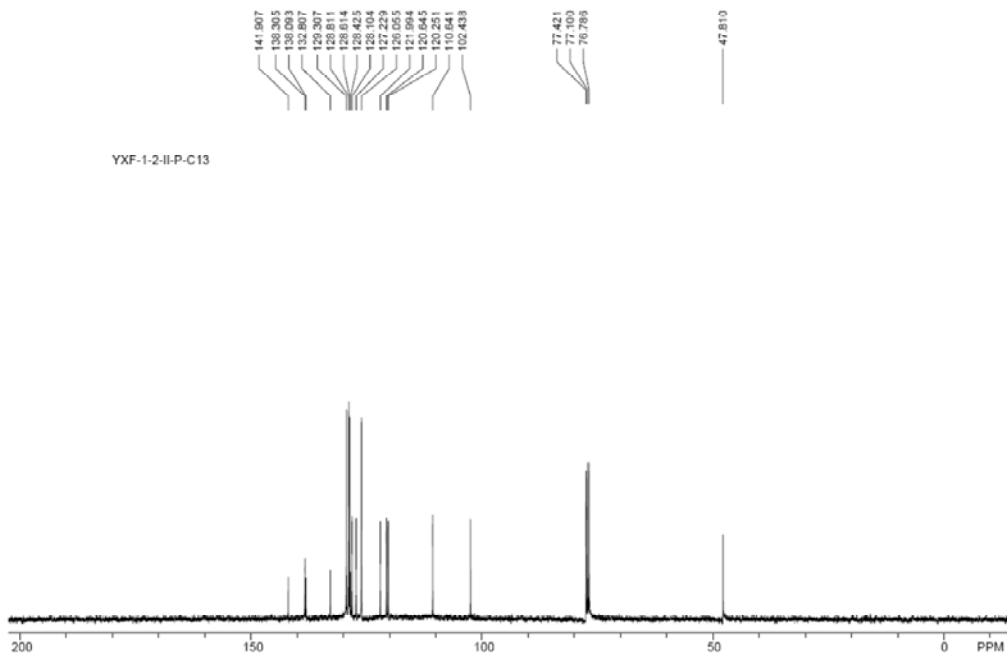

==== Shimadzu LCsolution Analysis Report ====

C:\LabSolutions\LCsolution\Sun\YXF\YXF-1-2-II-P.lcd  
 Sample Name : YXF-1-2-II-P  
 Tray# : 1  
 Vial # : 16  
 Injection Volume : 10 uL  
 Data File Name : YXF-1-2-II-P.lcd  
 Method File Name : SDQ gradient.lcm  
 Batch File Name : Batch 1.lcb  
 Data Acquired : 9/9/2011 12:01:38 PM

<Chromatogram>

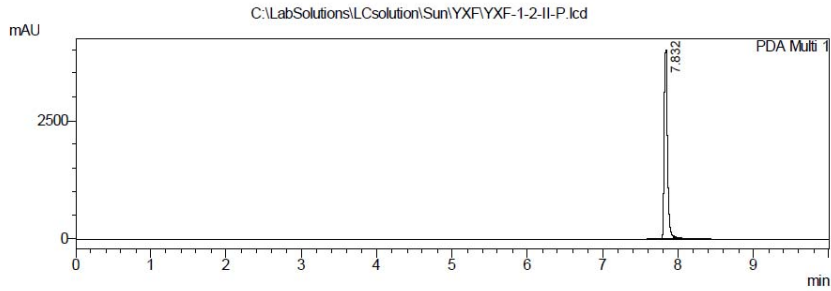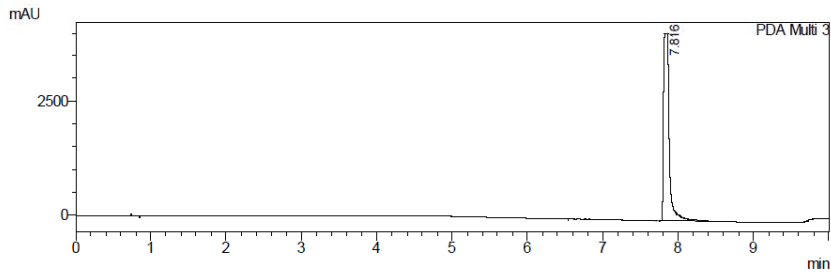

- 1 PDA Multi 1/254nm 4nm
- 2 PDA Multi 3/220nm 4nm

PeakTable

PDA Ch1 254nm 4nm

| Peak# | Ret. Time | Area     | Height  | Area %  | Height % |
|-------|-----------|----------|---------|---------|----------|
| 1     | 7.832     | 14071253 | 3997344 | 100.000 | 100.000  |
| Total |           | 14071253 | 3997344 | 100.000 | 100.000  |

PeakTable

PDA Ch3 220nm 4nm

| Peak# | Ret. Time | Area     | Height  | Area %  | Height % |
|-------|-----------|----------|---------|---------|----------|
| 1     | 7.816     | 23176733 | 4112709 | 100.000 | 100.000  |
| Total |           | 23176733 | 4112709 | 100.000 | 100.000  |

**<sup>1</sup>H NMR, <sup>13</sup>C NMR and HPLC spectra of compound 2b'**

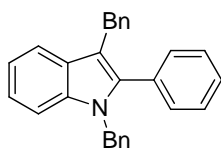

**2b'**

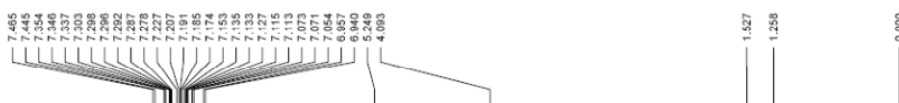

YXF-1-2-II-P1

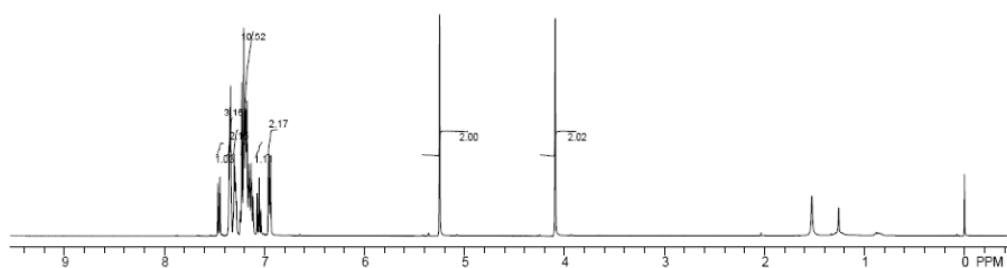

YXF-1-2-II-P1-C13

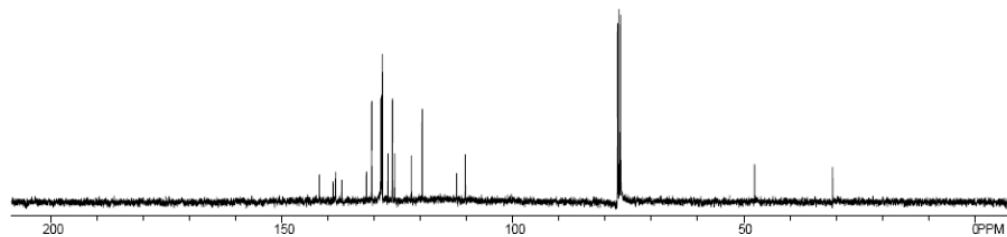

==== Shimadzu LCsolution Analysis Report ====

C:\LabSolutions\LCsolution\Sun\YXF\YXF-1-2-II-P1.lcd  
 Sample Name : YXF-1-2-II-P1  
 Tray# : 1  
 Vial # : 16  
 Injection Volume : 5 uL  
 Data File Name : YXF-1-2-II-P1.lcd  
 Method File Name : SDQ gradient.lcm  
 Batch File Name :  
 Data Acquired : 10/3/2011 4:11:30 PM

<Chromatogram>

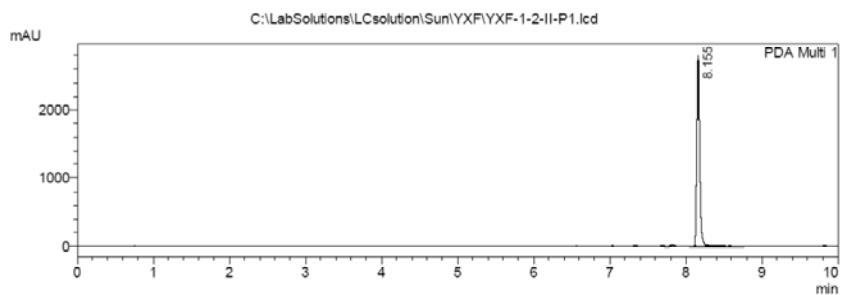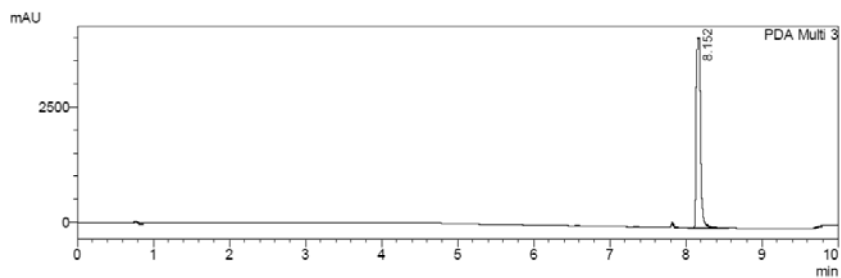

- 1 PDA Multi 1/254nm 4nm
- 2 PDA Multi 3/220nm 4nm

PeakTable

PDA Ch1 254nm 4nm

| Peak# | Ret. Time | Area    | Height  | Area %  | Height % |
|-------|-----------|---------|---------|---------|----------|
| 1     | 8.155     | 6521759 | 2731134 | 100.000 | 100.000  |
| Total |           | 6521759 | 2731134 | 100.000 | 100.000  |

PeakTable

PDA Ch3 220nm 4nm

| Peak# | Ret. Time | Area     | Height  | Area %  | Height % |
|-------|-----------|----------|---------|---------|----------|
| 1     | 8.152     | 15035107 | 4110781 | 100.000 | 100.000  |
| Total |           | 15035107 | 4110781 | 100.000 | 100.000  |

C:\LabSolutions\LCsolution\Sun\YXF\YXF-1-2-II-P1.lcd



**$^1\text{H}$  NMR,  $^{13}\text{C}$  NMR and HPLC spectra of compound 2c**

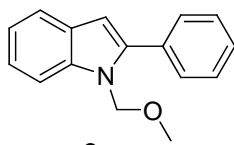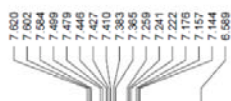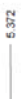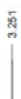

YXF-1-6-P

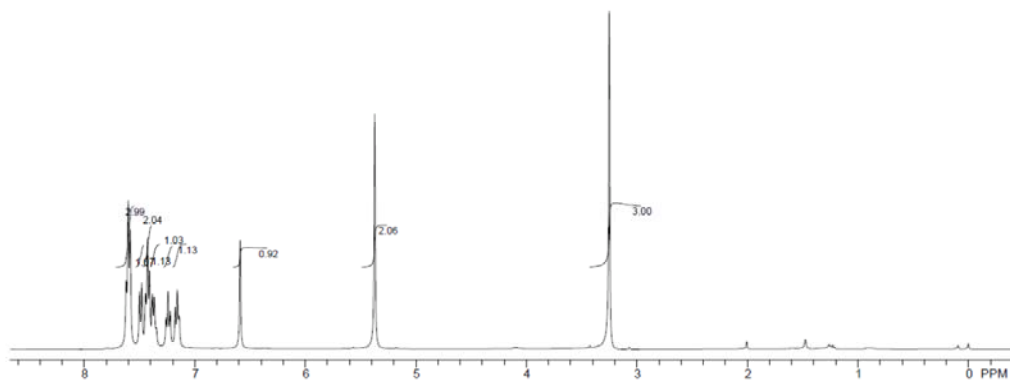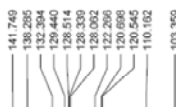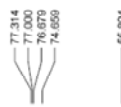

YXF-1-6-P-C13

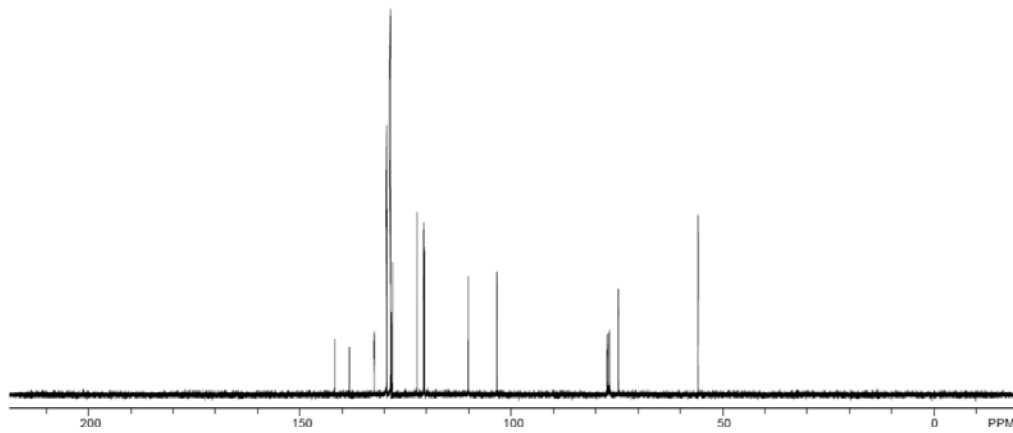

==== Shimadzu LCsolution Analysis Report ====

C:\LabSolutions\LCsolution\Sun\YXF\YXF-1-6-P.lcd  
 Sample Name : YXF-1-6-P  
 Tray# : 1  
 Vial # : 16  
 Injection Volume : 5 uL  
 Data File Name : YXF-1-6-P.lcd  
 Method File Name : SDQ.gradient.lcm  
 Batch File Name :  
 Data Acquired : 9/14/2011 12:02:18 PM

<Chromatogram>

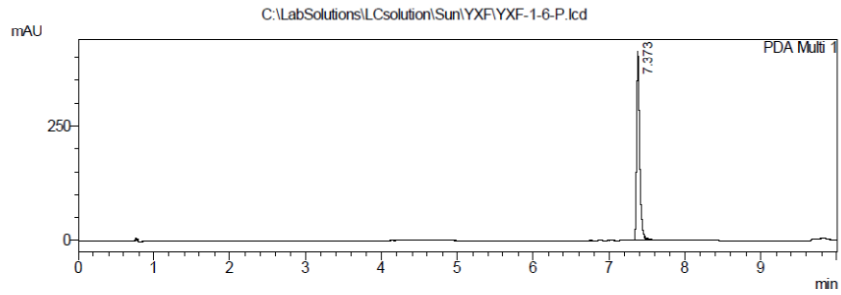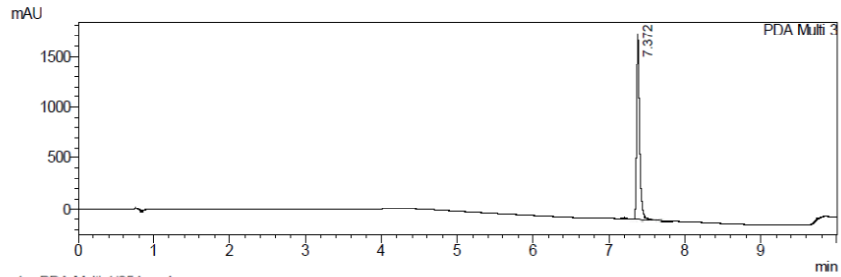

- 1 PDA Multi 1/254nm 4nm
- 2 PDA Multi 3/220nm 4nm

PeakTable

PDA Ch1 254nm 4nm

| Peak# | Ret. Time | Area    | Height | Area %  | Height % |
|-------|-----------|---------|--------|---------|----------|
| 1     | 7.373     | 1115181 | 409078 | 100.000 | 100.000  |
| Total |           | 1115181 | 409078 | 100.000 | 100.000  |

PeakTable

PDA Ch3 220nm 4nm

| Peak# | Ret. Time | Area    | Height  | Area %  | Height % |
|-------|-----------|---------|---------|---------|----------|
| 1     | 7.372     | 4711932 | 1821756 | 100.000 | 100.000  |
| Total |           | 4711932 | 1821756 | 100.000 | 100.000  |

<sup>1</sup>H NMR, <sup>13</sup>C NMR and HPLC spectra of compound 2d

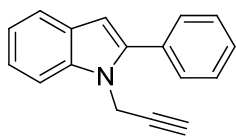

2d

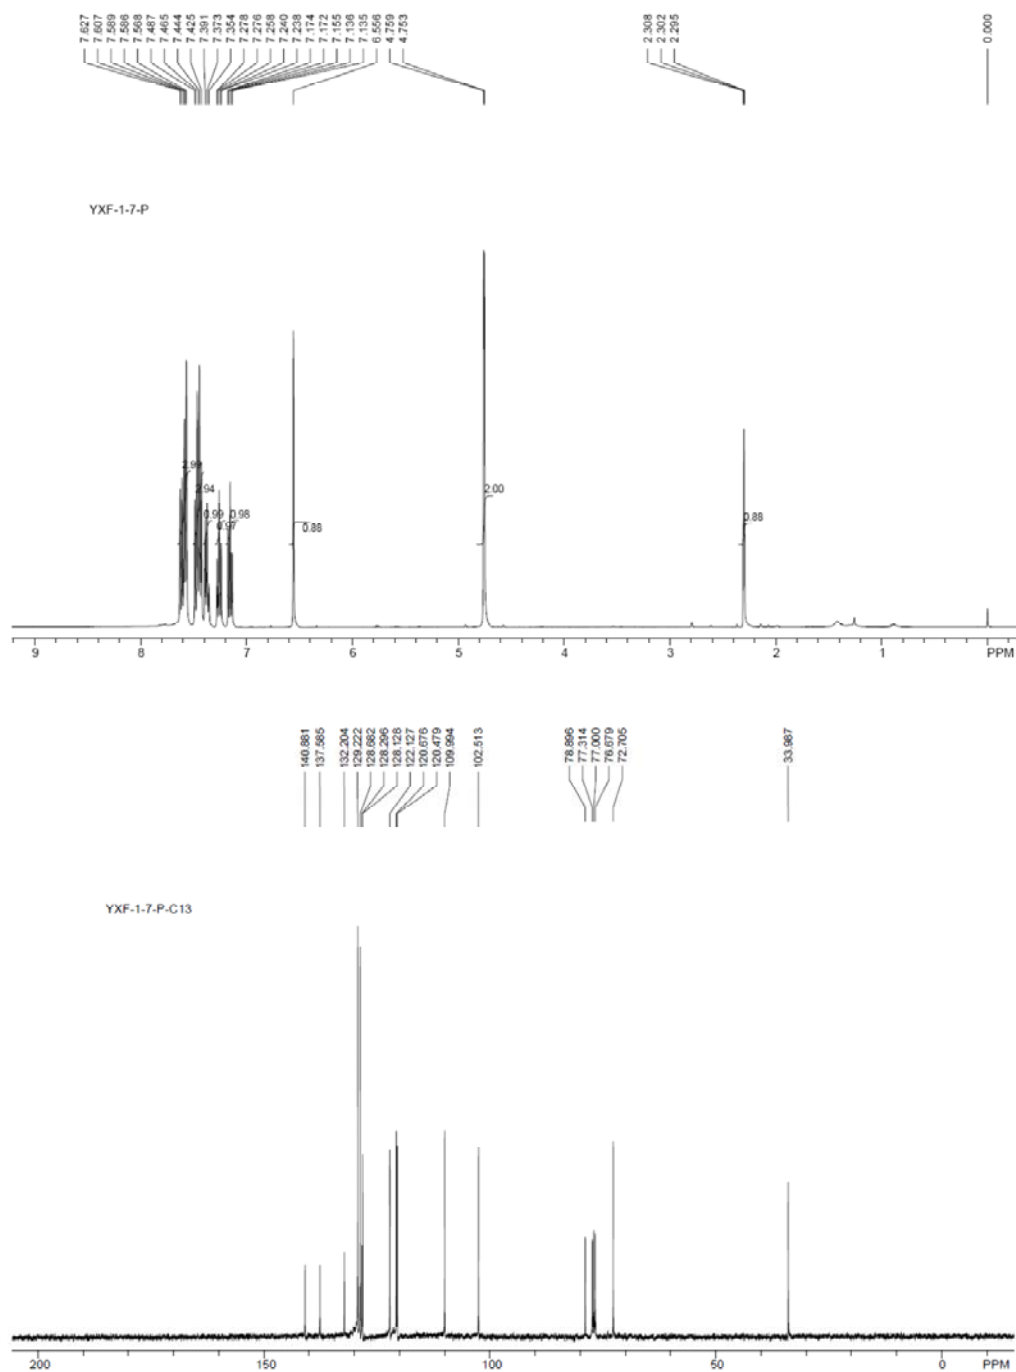

==== Shimadzu LCsolution Analysis Report ====

C:\LabSolutions\LCsolution\Sun\YXF\YXF-1-7-P.lcd  
 Sample Name : YXF-1-7-P  
 Tray# : 1  
 Vial # : 31  
 Injection Volume : 5 uL  
 Data File Name : YXF-1-7-P.lcd  
 Method File Name : SDQ.gradient.lcm  
 Batch File Name :  
 Data Acquired : 9/15/2011 12:25:16 PM

<Chromatogram>

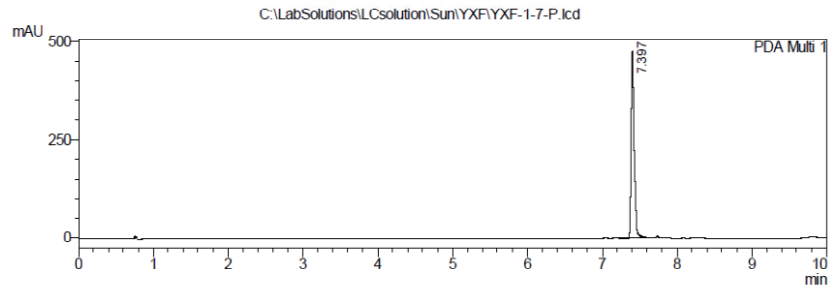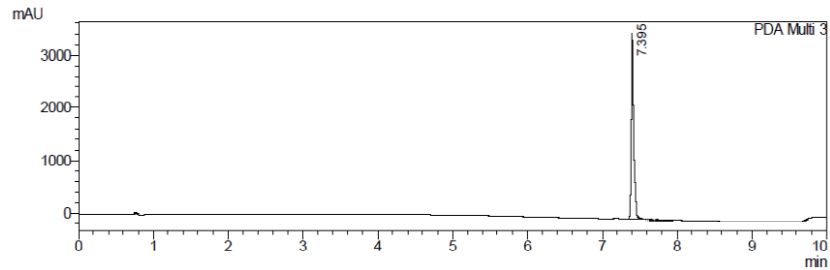

- 1 PDA Multi 1/254nm 4nm
- 2 PDA Multi 3/220nm 4nm

PeakTable

PDA Ch1 254nm 4nm

| Peak# | Ret. Time | Area    | Height | Area %  | Height % |
|-------|-----------|---------|--------|---------|----------|
| 1     | 7.397     | 1271547 | 472308 | 100.000 | 100.000  |
| Total |           | 1271547 | 472308 | 100.000 | 100.000  |

PeakTable

PDA Ch3 220nm 4nm

| Peak# | Ret. Time | Area    | Height  | Area %  | Height % |
|-------|-----------|---------|---------|---------|----------|
| 1     | 7.395     | 7435278 | 3517705 | 100.000 | 100.000  |
| Total |           | 7435278 | 3517705 | 100.000 | 100.000  |

<sup>1</sup>H NMR, <sup>13</sup>C NMR and HPLC spectra of compound 2e

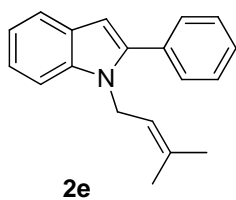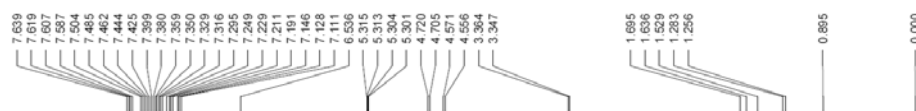

YXF-1-8-P1

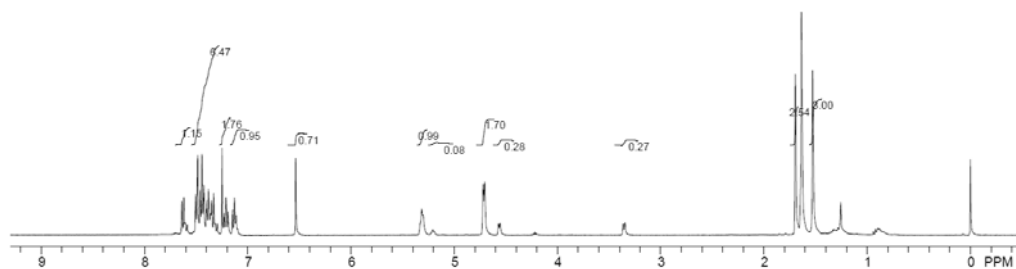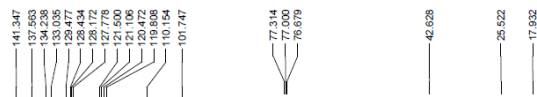

YXF-2-76-I-P1-C13(2e)

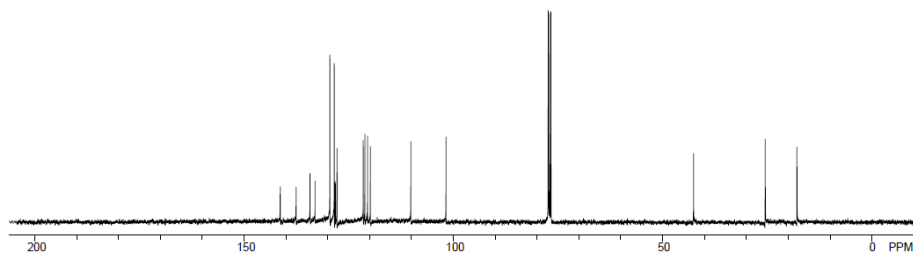

### ==== Shimadzu LCsolution Analysis Report ====

Sample Name : YXF-1-8-P1  
 Tray# : 1  
 Vial# : 16  
 Injection Volume : 10 uL  
 Data File Name : YXF-1-8-P1.lcd  
 Method File Name : SDQ gradient.lcm  
 Batch File Name : Batch 1.lcb  
 Data Acquired : 9/29/2011 10:14:34 AM

#### <Chromatogram>

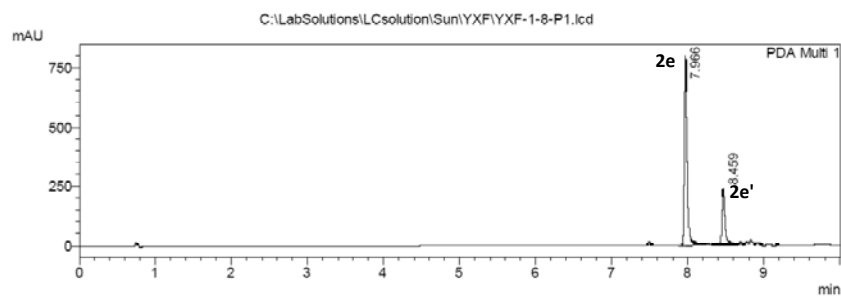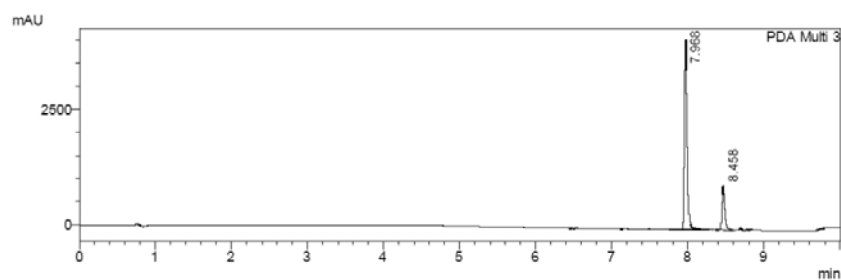

- 1 PDA Multi 1/254nm 4nm  
 2 PDA Multi 3/220nm 4nm

PeakTable

PDA Ch1 254nm 4nm

| Peak# | Ret. Time | Area    | Height  | Area %  | Height % |
|-------|-----------|---------|---------|---------|----------|
| 1     | 7.966     | 2041713 | 788121  | 76.470  | 77.273   |
| 2     | 8.459     | 628227  | 231797  | 23.530  | 22.727   |
| Total |           | 2669940 | 1019917 | 100.000 | 100.000  |

PeakTable

PDA Ch3 220nm 4nm

| Peak# | Ret. Time | Area     | Height  | Area %  | Height % |
|-------|-----------|----------|---------|---------|----------|
| 1     | 7.968     | 10667941 | 4100459 | 81.134  | 80.977   |
| 2     | 8.458     | 2480684  | 963271  | 18.866  | 19.023   |
| Total |           | 13148625 | 5063730 | 100.000 | 100.000  |

C:\LabSolutions\LCsolution\Sun\YXF\YXF-1-8-P1.lcd

# <sup>1</sup>H NMR, <sup>13</sup>C NMR and HPLC spectra of compound 2e'

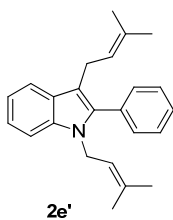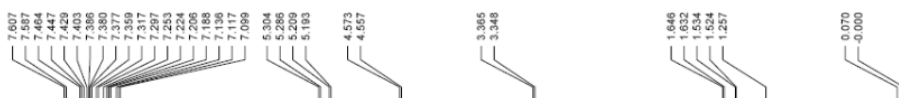

YXF-1-8-P2

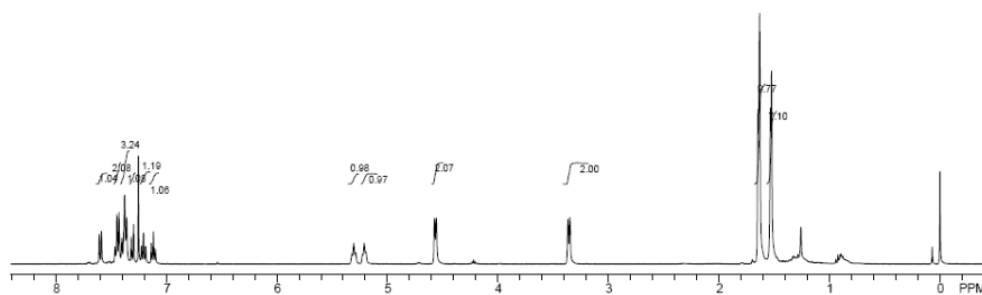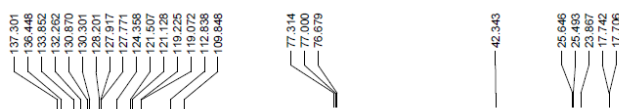

YXF-2-76-I-P2-C13(2e')

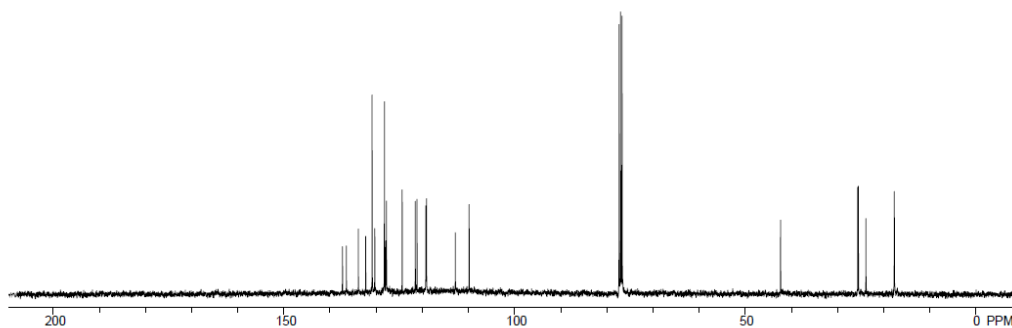

==== Shimadzu LCsolution Analysis Report ====

C:\LabSolutions\LCsolution\Sun\YXF\YXF-1-8-P2.lcd  
 Sample Name : YXF-1-8-P2  
 Tray# : 1  
 Vial # : 17  
 Injection Volume : 10 uL  
 Data File Name : YXF-1-8-P2.lcd  
 Method File Name : SDQ gradient.lcm  
 Batch File Name : Batch 1.lcb  
 Data Acquired : 9/29/2011 10:25:02 AM

<Chromatogram>

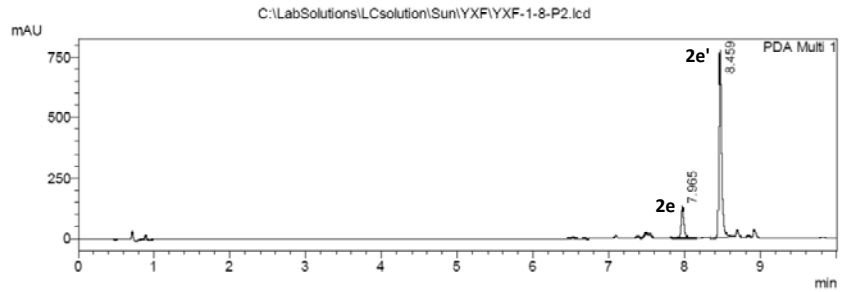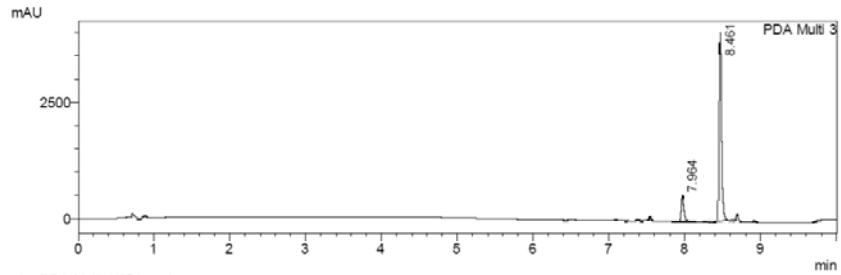

- 1 PDA Multi 1/254nm 4nm
- 2 PDA Multi 3/220nm 4nm

PeakTable

PDA Ch1 254nm 4nm

| Peak# | Ret. Time | Area    | Height | Area %  | Height % |
|-------|-----------|---------|--------|---------|----------|
| 1     | 7.965     | 331997  | 127893 | 14.874  | 14.440   |
| 2     | 8.459     | 1900007 | 747808 | 85.126  | 85.560   |
| Total |           | 2232005 | 885702 | 100.000 | 100.000  |

PeakTable

PDA Ch3 220nm 4nm

| Peak# | Ret. Time | Area     | Height  | Area %  | Height % |
|-------|-----------|----------|---------|---------|----------|
| 1     | 7.964     | 1478478  | 568231  | 13.606  | 12.317   |
| 2     | 8.461     | 9388136  | 4045176 | 86.394  | 87.683   |
| Total |           | 10866614 | 4613407 | 100.000 | 100.000  |

C:\LabSolutions\LCsolution\Sun\YXF\YXF-1-8-P2.lcd



<sup>1</sup>H NMR, <sup>13</sup>C NMR and HPLC spectra of compound 2f

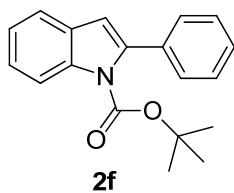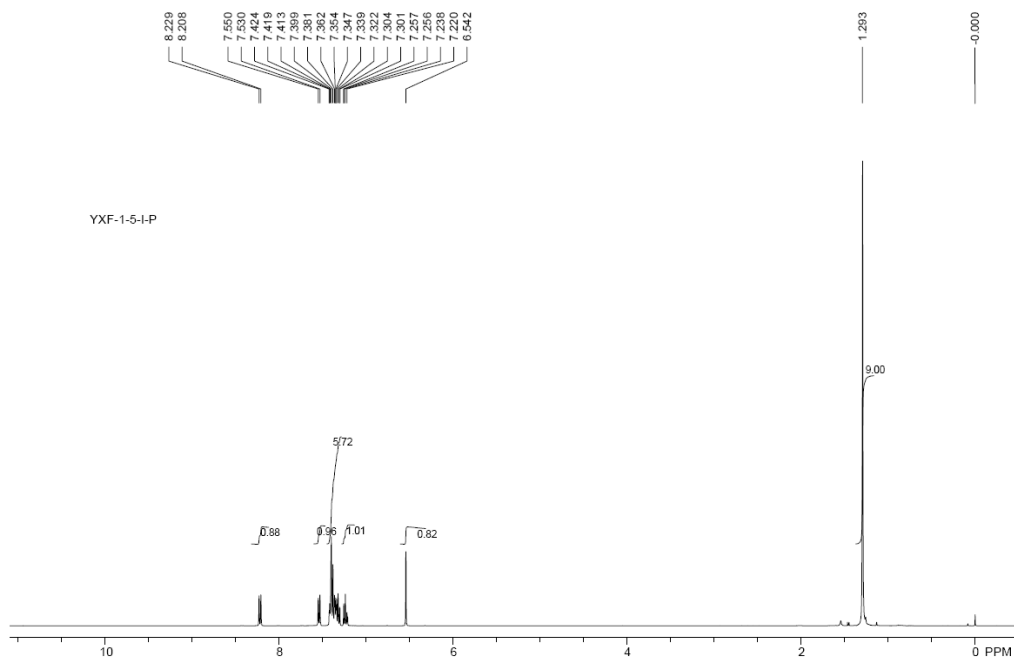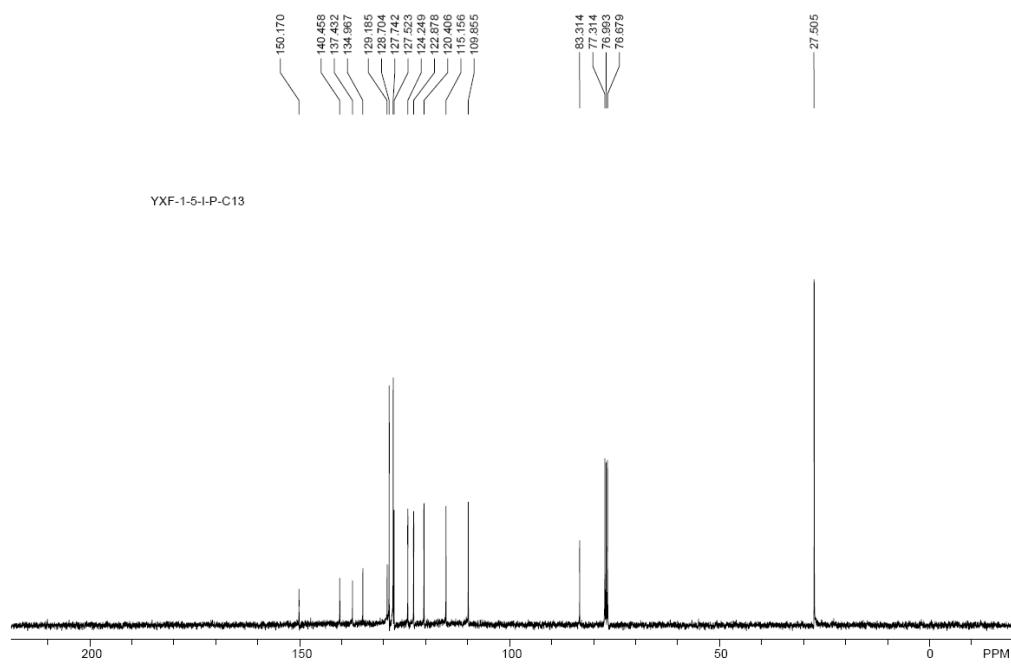

==== Shimadzu LCsolution Analysis Report ====

C:\LabSolutions\LCsolution\Sun\YXF\YXF-1-5-I-P.lcd  
 Sample Name : YXF-1-5-I-P  
 Tray# : 1  
 Vial # : 2  
 Injection Volume : 10 uL  
 Data File Name : YXF-1-5-I-P.lcd  
 Method File Name : SDQ gradient.lcm  
 Batch File Name :  
 Data Acquired : 9/13/2011 2:36:50 PM

<Chromatogram>

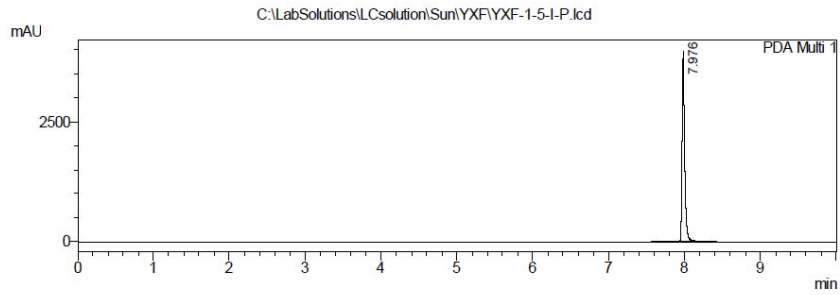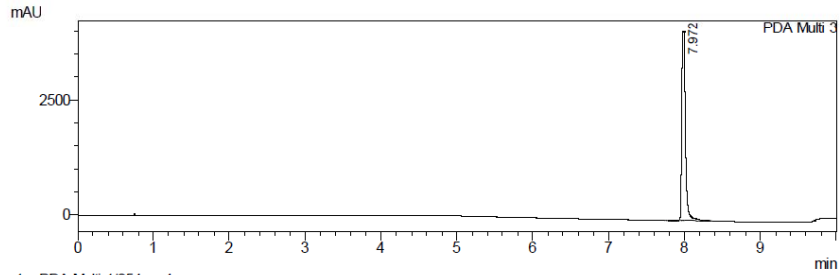

- 1 PDA Multi 1/254nm 4nm
- 2 PDA Multi 3/220nm 4nm

PeakTable

PDA Ch1 254nm 4nm

| Peak# | Ret. Time | Area     | Height  | Area %  | Height % |
|-------|-----------|----------|---------|---------|----------|
| 1     | 7.976     | 10652806 | 3843756 | 100.000 | 100.000  |
| Total |           | 10652806 | 3843756 | 100.000 | 100.000  |

PeakTable

PDA Ch3 220nm 4nm

| Peak# | Ret. Time | Area     | Height  | Area %  | Height % |
|-------|-----------|----------|---------|---------|----------|
| 1     | 7.972     | 15700617 | 4119156 | 100.000 | 100.000  |
| Total |           | 15700617 | 4119156 | 100.000 | 100.000  |

<sup>1</sup>H NMR, <sup>13</sup>C NMR and HPLC spectra of compound 3

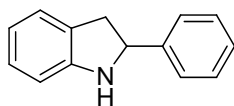

3

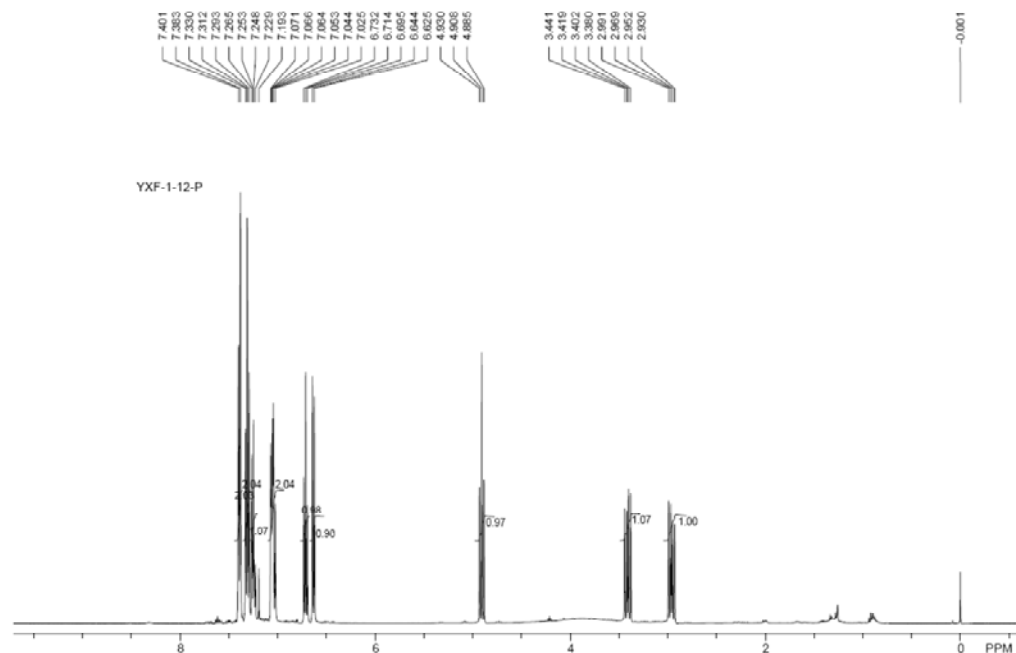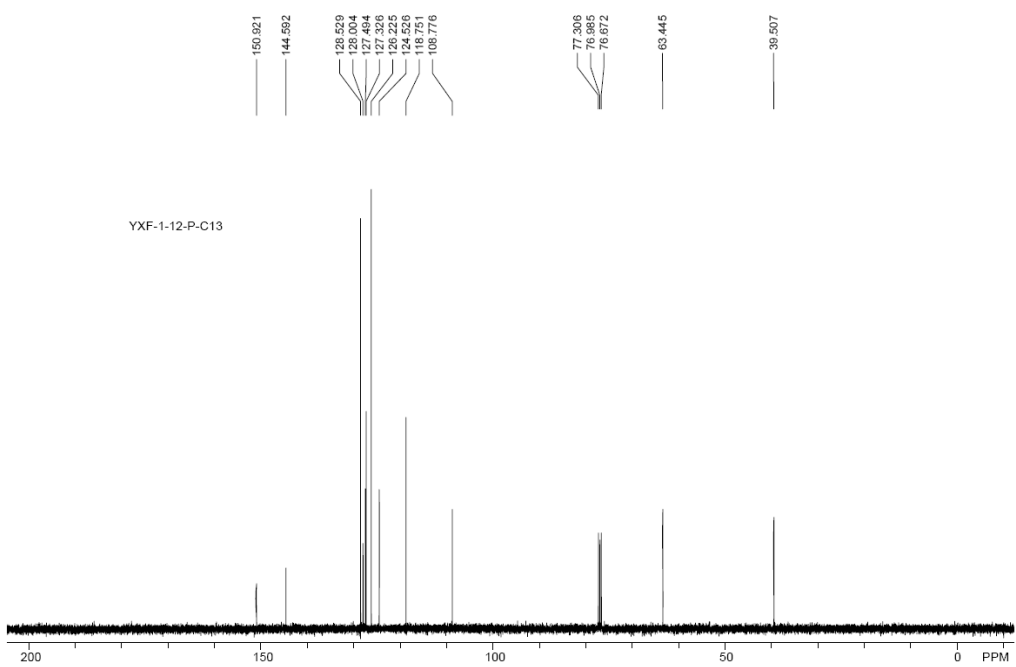

### ==== Shimadzu LCsolution Analysis Report ====

C:\LabSolutions\LCsolution\Sun\YXF\YXF-1-12-P.lcd  
 Sample Name : YXF-1-12-P  
 Tray# : 1  
 Vial # : 31  
 Injection Volume : 5 uL  
 Data File Name : YXF-1-12-P.lcd  
 Method File Name : SDQ.gradient.lcm  
 Batch File Name :  
 Data Acquired : 3/2/2012 11:01:52 AM

#### <Chromatogram>

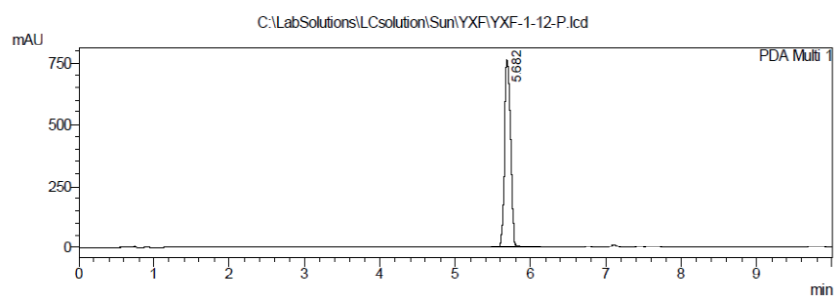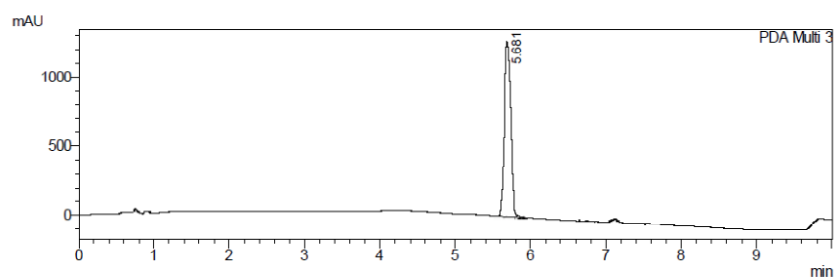

- 1 PDA Multi 1/254nm 4nm
- 2 PDA Multi 3/220nm 4nm

PeakTable

PDA Ch1 254nm 4nm

| Peak# | Ret. Time | Area    | Height | Area %  | Height % |
|-------|-----------|---------|--------|---------|----------|
| 1     | 5.682     | 4263748 | 761957 | 100.000 | 100.000  |
| Total |           | 4263748 | 761957 | 100.000 | 100.000  |

PeakTable

PDA Ch3 220nm 4nm

| Peak# | Ret. Time | Area    | Height  | Area %  | Height % |
|-------|-----------|---------|---------|---------|----------|
| 1     | 5.681     | 7602791 | 1276296 | 100.000 | 100.000  |
| Total |           | 7602791 | 1276296 | 100.000 | 100.000  |

C:\LabSolutions\LCsolution\Sun\YXF\YXF-1-12-P.lcd

<sup>1</sup>H NMR, <sup>13</sup>C NMR and HPLC spectra of compound 5

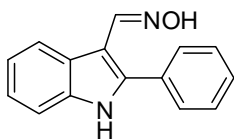

5

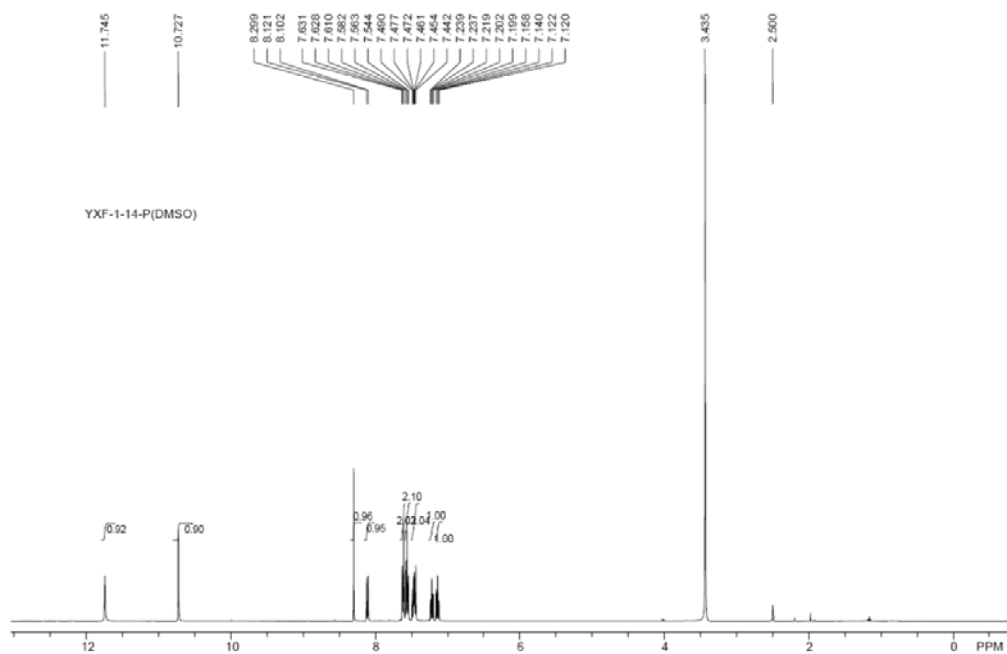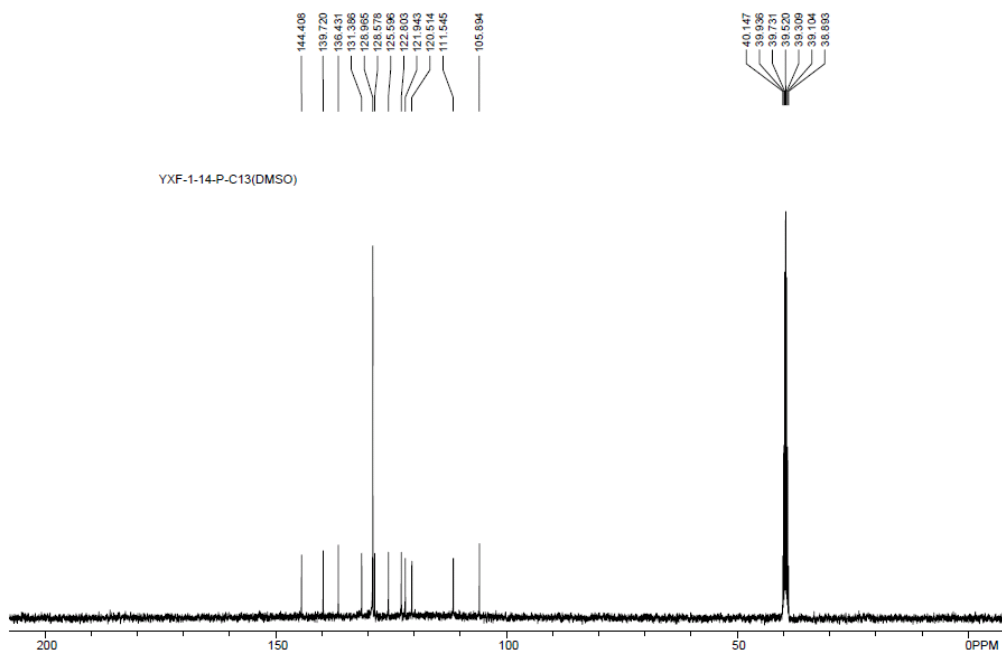

==== Shimadzu LCsolution Analysis Report ====

C:\LabSolutions\LCsolution\Sun\YXF\YXF-1-14-P.lcd  
 Sample Name : YXF-1-14-P  
 Tray# : 1  
 Vial # : 16  
 Injection Volume : 5 uL  
 Data File Name : YXF-1-14-P.lcd  
 Method File Name : SDQ.gradient.lcm  
 Batch File Name :  
 Data Acquired : 9/27/2011 12:48:47 PM

<Chromatogram>

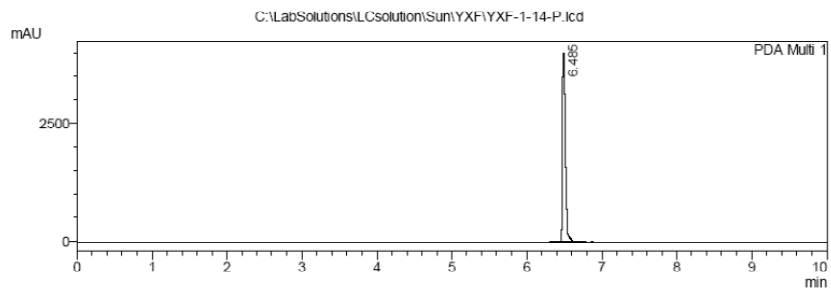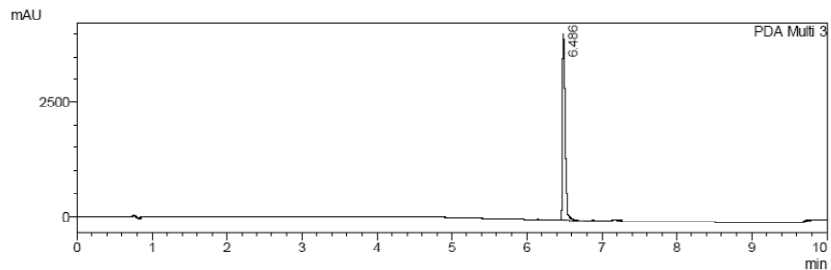

- 1 PDA Multi 1/254nm 4nm
- 2 PDA Multi 3/220nm 4nm

PeakTable

PDA Ch1 254nm 4nm

| Peak# | Ret. Time | Area     | Height  | Area %  | Height % |
|-------|-----------|----------|---------|---------|----------|
| 1     | 6.485     | 10483899 | 3934865 | 100.000 | 100.000  |
| Total |           | 10483899 | 3934865 | 100.000 | 100.000  |

PeakTable

PDA Ch3 220nm 4nm

| Peak# | Ret. Time | Area    | Height  | Area %  | Height % |
|-------|-----------|---------|---------|---------|----------|
| 1     | 6.486     | 9798412 | 4068656 | 100.000 | 100.000  |
| Total |           | 9798412 | 4068656 | 100.000 | 100.000  |

<sup>1</sup>H NMR, <sup>13</sup>C NMR and HPLC spectra of compound 6a

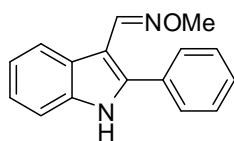

6a

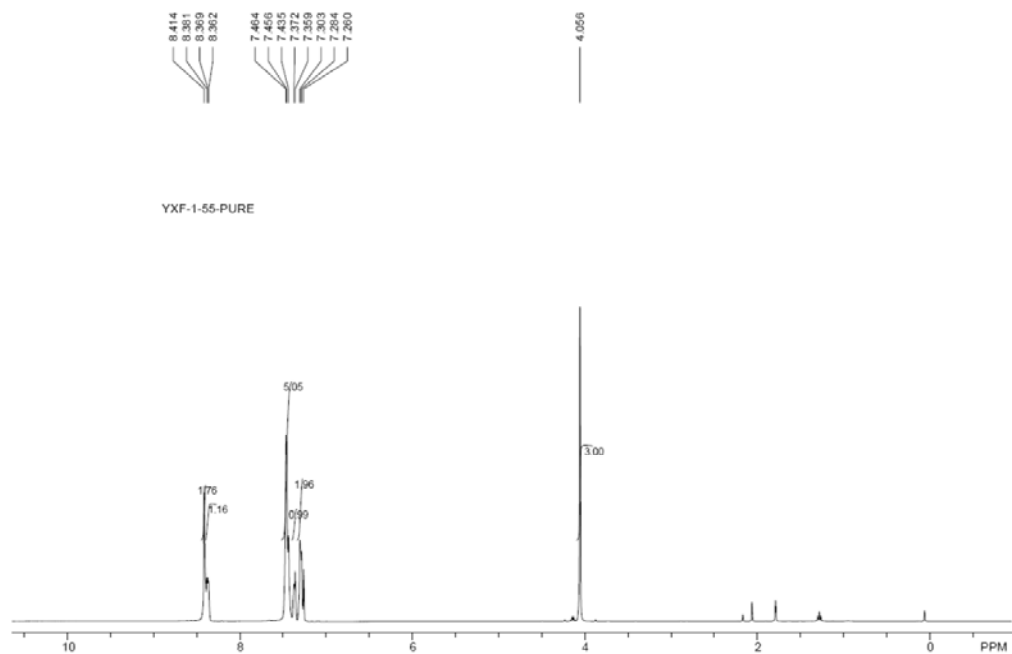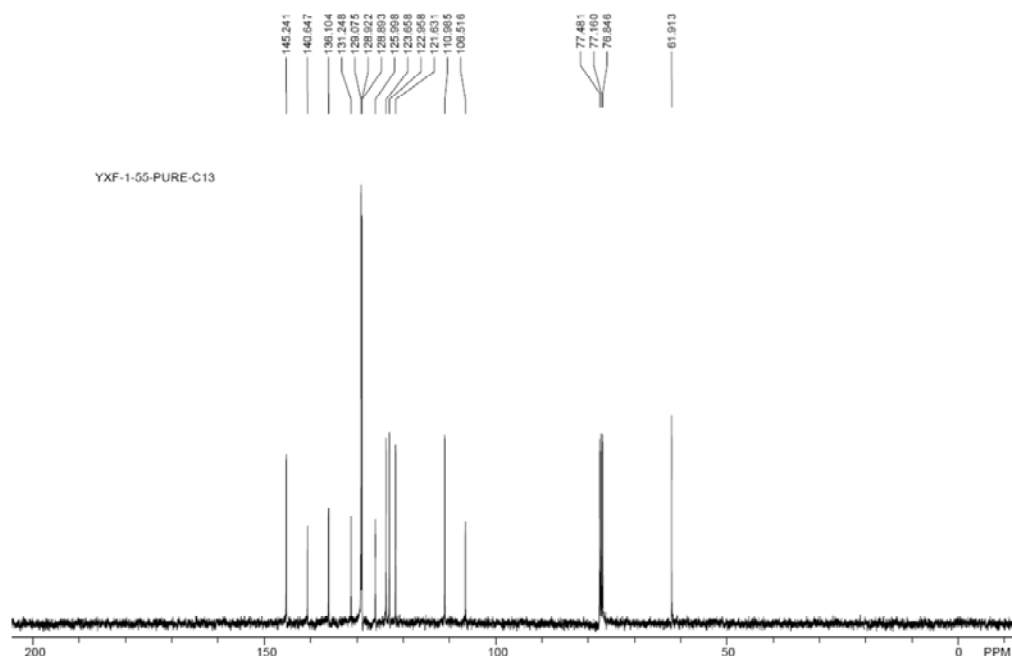

==== Shimadzu LCsolution Analysis Report ====

C:\LabSolutions\LCsolution\Sun\YXF\YXF-1-55-P.lcd  
 Sample Name : YXF-1-55-P  
 Tray# : 1  
 Vial # : 31  
 Injection Volume : 5 uL  
 Data File Name : YXF-1-55-P.lcd  
 Method File Name : SDQ gradient.lcm  
 Batch File Name :  
 Data Acquired : 11/22/2011 9:14:02 AM

<Chromatogram>

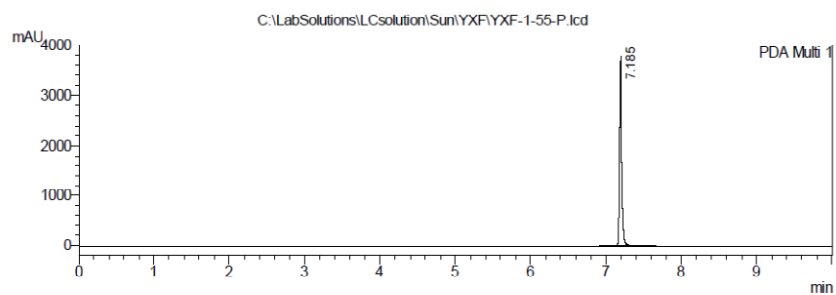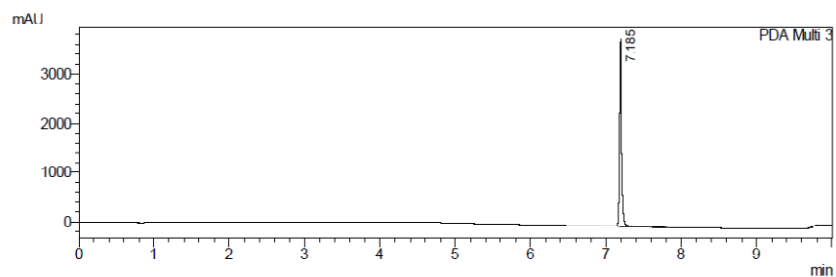

- 1 PDA Multi 1/254nm 4nm
- 2 PDA Multi 3/220nm 4nm

PeakTable

PDA Ch1 254nm 4nm

| Peak# | Ret. Time | Area    | Height  | Area %  | Height % |
|-------|-----------|---------|---------|---------|----------|
| 1     | 7.185     | 8329315 | 3597285 | 100.000 | 100.000  |
| Total |           | 8329315 | 3597285 | 100.000 | 100.000  |

PeakTable

PDA Ch3 220nm 4nm

| Peak# | Ret. Time | Area    | Height  | Area %  | Height % |
|-------|-----------|---------|---------|---------|----------|
| 1     | 7.185     | 7919980 | 3802382 | 100.000 | 100.000  |
| Total |           | 7919980 | 3802382 | 100.000 | 100.000  |



<sup>1</sup>H NMR, <sup>13</sup>C NMR and HPLC spectra of compound 6b

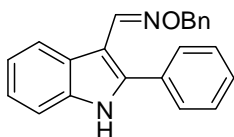

6b

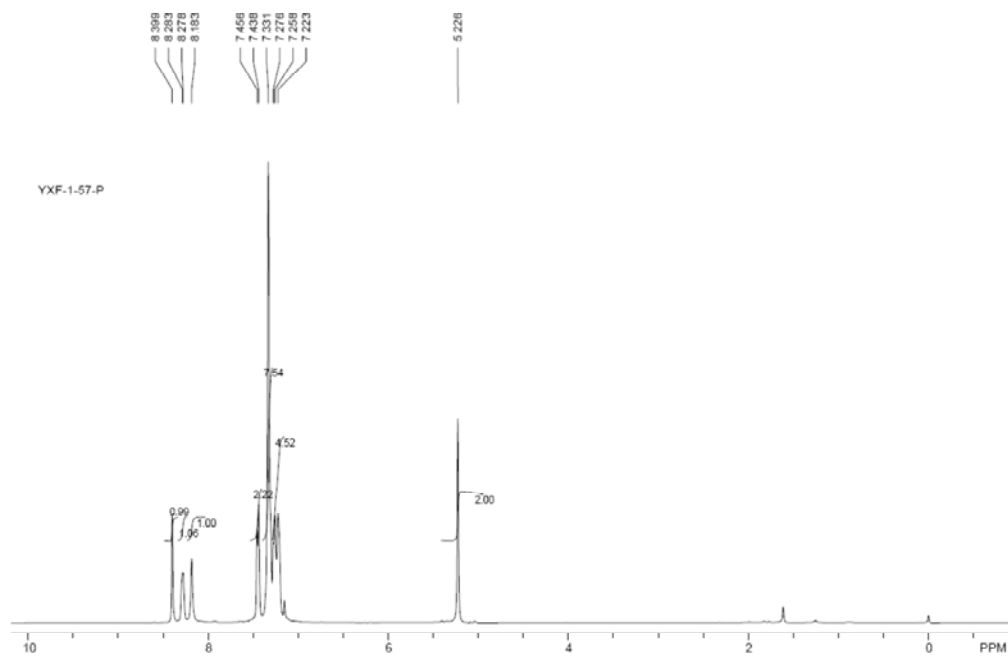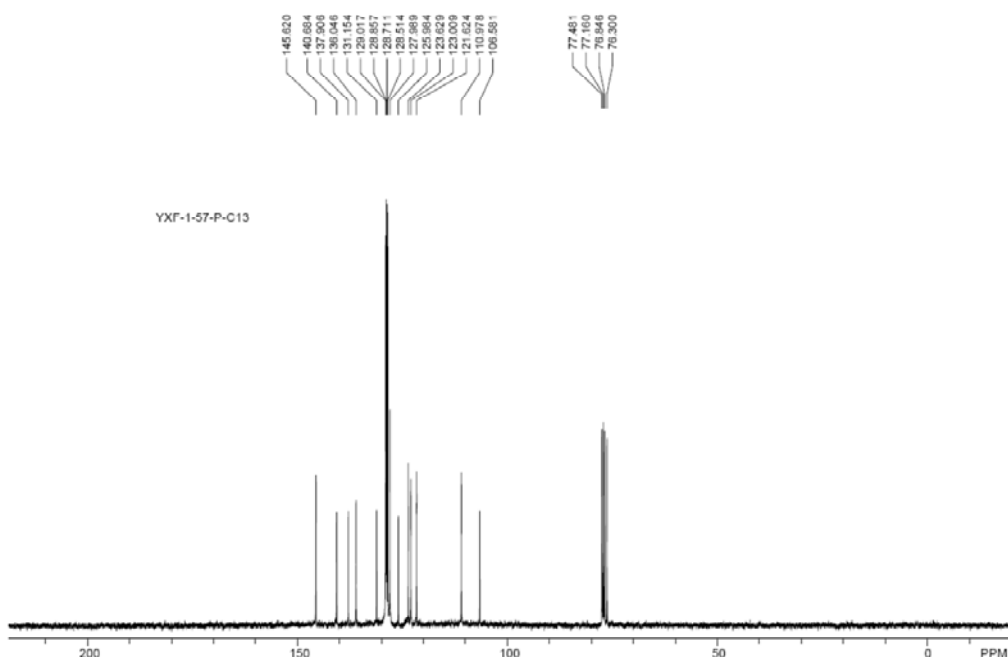

### ==== Shimadzu LCsolution Analysis Report ====

C:\LabSolutions\LCsolution\Sun\YXF\YXF-1-57-P.lcd  
 Sample Name : YXF-1-57-P  
 Tray# : 1  
 Vial # : 31  
 Injection Volume : 5 uL  
 Data File Name : YXF-1-57-P.lcd  
 Method File Name : SDQ gradient.lcm  
 Batch File Name :  
 Data Acquired : 11/22/2011 5:49:28 PM

#### <Chromatogram>

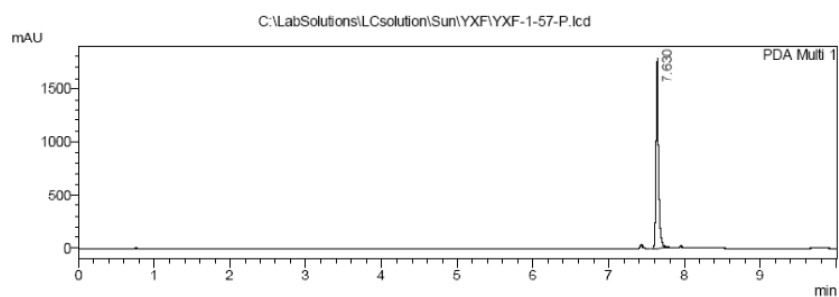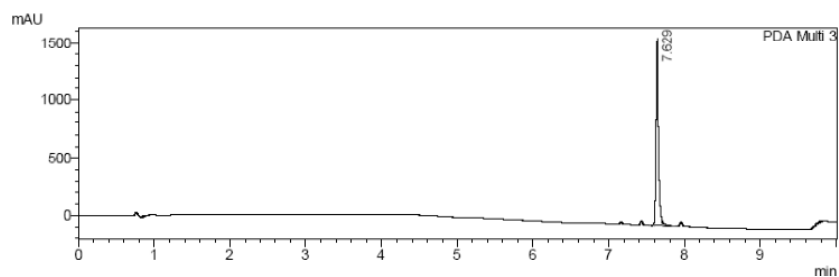

- 1 PDA Multi 1/254nm 4nm
- 2 PDA Multi 3/220nm 4nm

#### PeakTable

PDA Ch1 254nm 4nm

| Peak# | Ret. Time | Area    | Height  | Area %  | Height % |
|-------|-----------|---------|---------|---------|----------|
| 1     | 7.630     | 4221511 | 1751041 | 100.000 | 100.000  |
| Total |           | 4221511 | 1751041 | 100.000 | 100.000  |

#### PeakTable

PDA Ch3 220nm 4nm

| Peak# | Ret. Time | Area    | Height  | Area %  | Height % |
|-------|-----------|---------|---------|---------|----------|
| 1     | 7.629     | 3787329 | 1619584 | 100.000 | 100.000  |
| Total |           | 3787329 | 1619584 | 100.000 | 100.000  |

C:\LabSolutions\LCsolution\Sun\YXF\YXF-1-57-P.lcd

<sup>1</sup>H NMR, <sup>13</sup>C NMR and HPLC spectra of compound 7

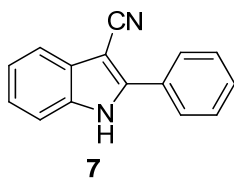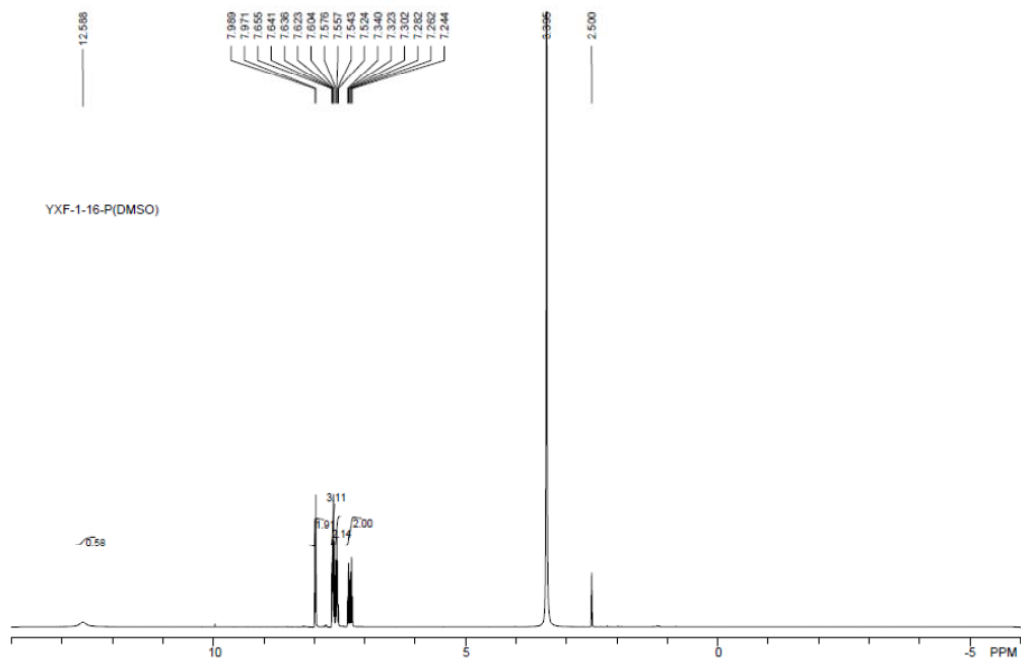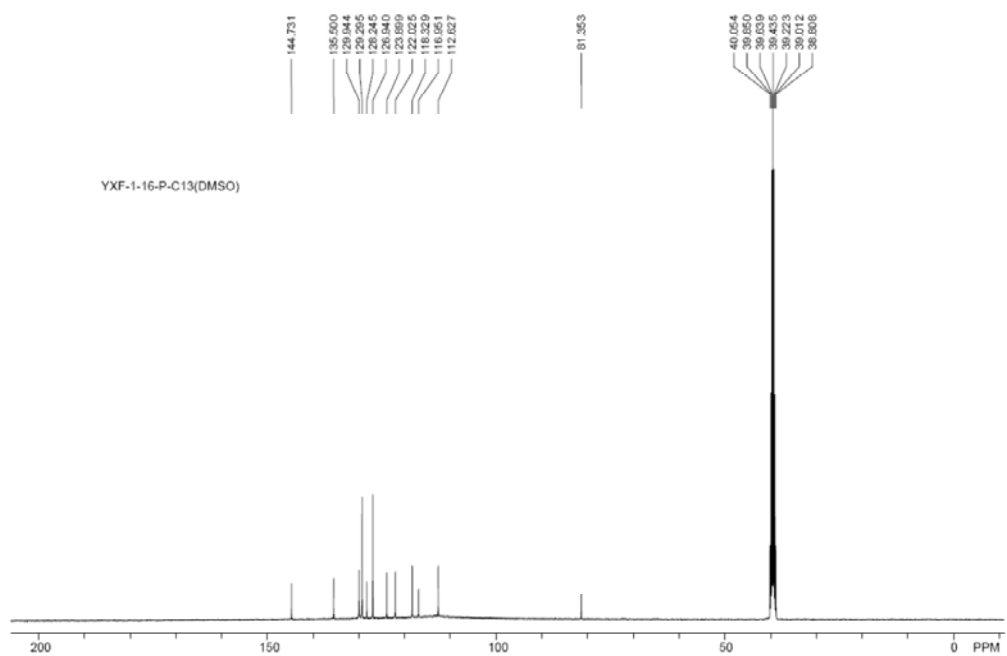

==== Shimadzu LCsolution Analysis Report ====

C:\LabSolutions\LCsolution\Sun\YXF\YXF-1-16-P.lcd  
 Sample Name : YXF-1-16-P  
 Tray# : 1  
 Vial # : 17  
 Injection Volume : 5 uL  
 Data File Name : YXF-1-16-P.lcd  
 Method File Name : SDQ.gradient.lcm  
 Batch File Name : Batch 1.lcb  
 Data Acquired : 9/28/2011 4:02:54 PM

<Chromatogram>

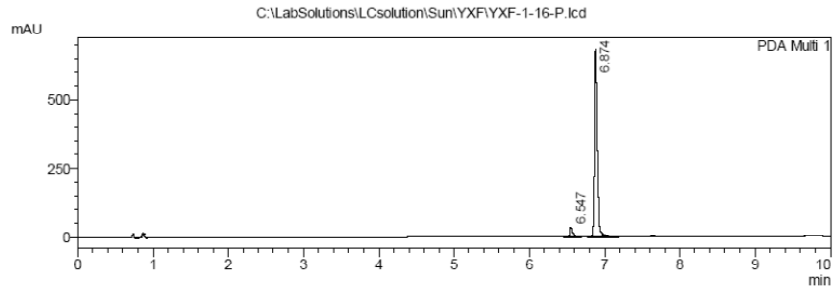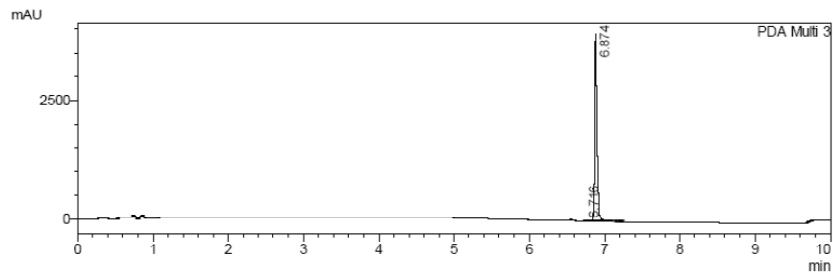

- 1 PDA Multi 1/254nm 4nm
- 2 PDA Multi 3/220nm 4nm

PeakTable

PDA Ch1 254nm 4nm

| Peak# | Ret. Time | Area    | Height | Area %  | Height % |
|-------|-----------|---------|--------|---------|----------|
| 1     | 6.547     | 85904   | 34808  | 4.661   | 4.940    |
| 2     | 6.874     | 1757011 | 669820 | 95.339  | 95.060   |
| Total |           | 1842914 | 704628 | 100.000 | 100.000  |

PeakTable

PDA Ch3 220nm 4nm

| Peak# | Ret. Time | Area    | Height  | Area %  | Height % |
|-------|-----------|---------|---------|---------|----------|
| 1     | 6.716     | 118     | 0       | 0.001   | 0.000    |
| 2     | 6.874     | 8643545 | 3930576 | 99.999  | 100.000  |
| Total |           | 8643663 | 3930576 | 100.000 | 100.000  |

<sup>1</sup>H NMR, <sup>13</sup>C NMR and HPLC spectra of compound 10aa

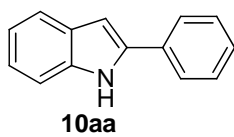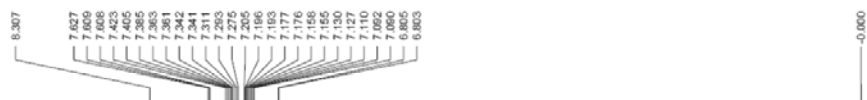

YXF-1-23-Pure

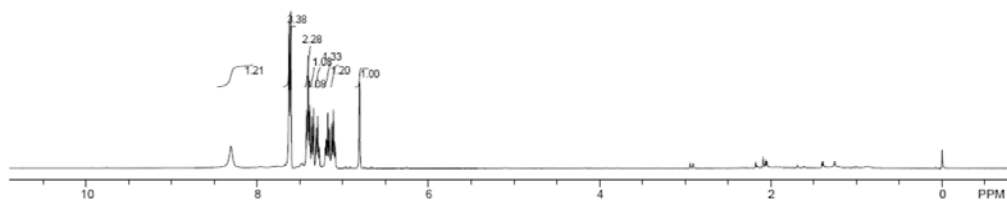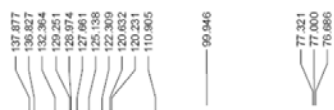

YXF-1-23-Pure-C13

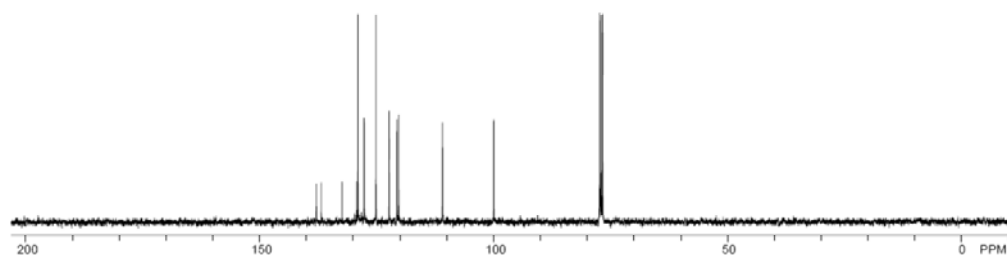

==== Shimadzu LCsolution Analysis Report ====

C:\LabSolutions\LCsolution\Sun\YXF\YXF-1-23-P.lcd  
 Sample Name : YXF-1-23-P  
 Tray# : 1  
 Vial # : 1  
 Injection Volume : 5 uL  
 Data File Name : YXF-1-23-P.lcd  
 Method File Name : SDQ gradient.lcm  
 Batch File Name :  
 Data Acquired : 10/12/2011 12:11:08 PM

<Chromatogram>

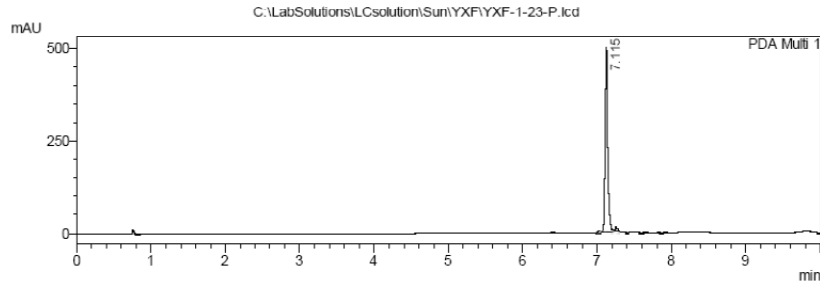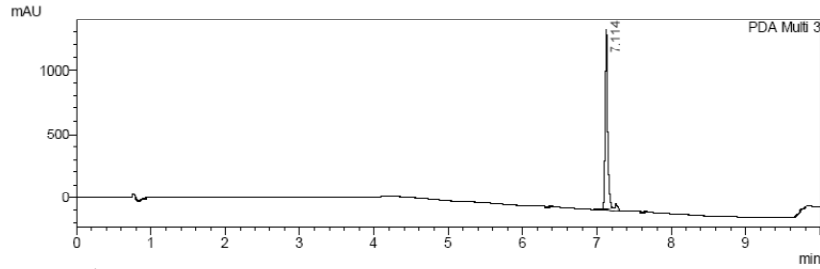

- 1 PDA Multi 1/254nm 4nm
- 2 PDA Multi 3/220nm 4nm

PeakTable

| PDA Ch1 254nm 4nm |           |         |        |         |          |
|-------------------|-----------|---------|--------|---------|----------|
| Peak#             | Ret. Time | Area    | Height | Area %  | Height % |
| 1                 | 7.115     | 1279880 | 490263 | 100.000 | 100.000  |
| Total             |           | 1279880 | 490263 | 100.000 | 100.000  |

PeakTable

| PDA Ch3 220nm 4nm |           |         |         |         |          |
|-------------------|-----------|---------|---------|---------|----------|
| Peak#             | Ret. Time | Area    | Height  | Area %  | Height % |
| 1                 | 7.114     | 3593907 | 1405153 | 100.000 | 100.000  |
| Total             |           | 3593907 | 1405153 | 100.000 | 100.000  |

**<sup>1</sup>H NMR, <sup>13</sup>C NMR and HPLC spectra of compound 10ab**

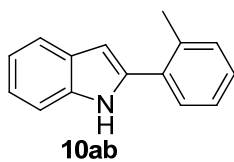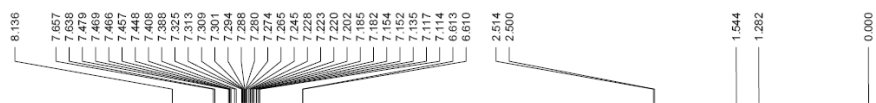

YXF-1-17-P

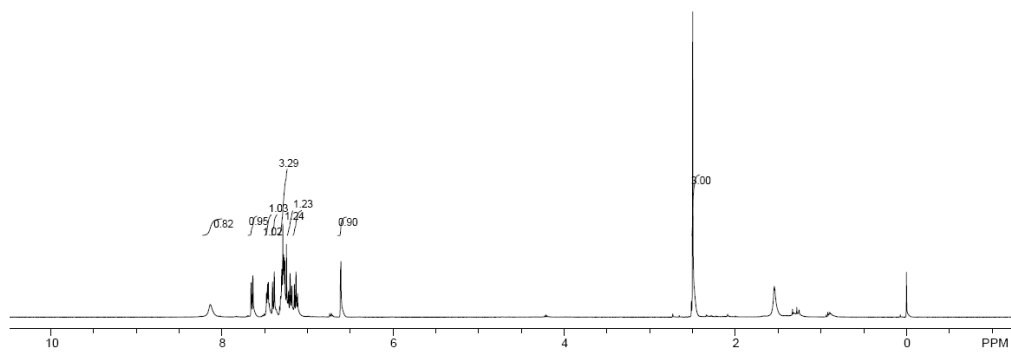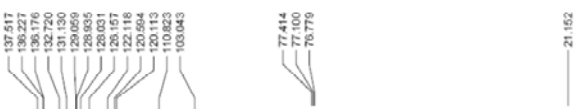

YXF-1-17-P-C13

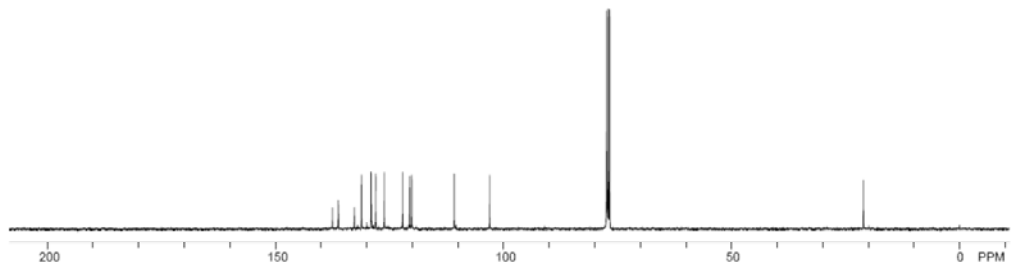

==== Shimadzu LCsolution Analysis Report ====

C:\LabSolutions\LCsolution\Sun\YXF\YXF-1-17-P.lcd  
 Sample Name : YXF-1-17-P  
 Tray# : 1  
 Vial # : 31  
 Injection Volume : 5 uL  
 Data File Name : YXF-1-17-P.lcd  
 Method File Name : SDQ gradient.lcm  
 Batch File Name :  
 Data Acquired : 3/12/2012 12:14:54 PM

<Chromatogram>

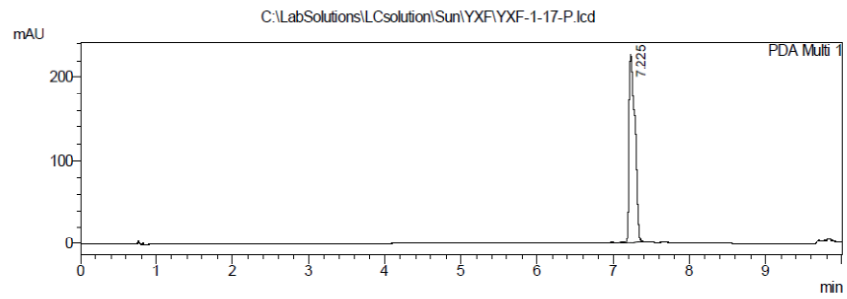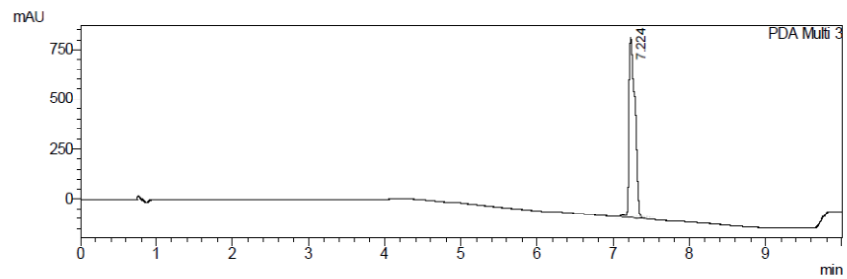

- 1 PDA Multi 1/254nm 4nm
- 2 PDA Multi 3/220nm 4nm

PeakTable

PDA Ch1 254nm 4nm

| Peak# | Ret. Time | Area    | Height | Area %  | Height % |
|-------|-----------|---------|--------|---------|----------|
| 1     | 7.225     | 1210878 | 225239 | 100.000 | 100.000  |
| Total |           | 1210878 | 225239 | 100.000 | 100.000  |

PeakTable

PDA Ch3 220nm 4nm

| Peak# | Ret. Time | Area    | Height | Area %  | Height % |
|-------|-----------|---------|--------|---------|----------|
| 1     | 7.224     | 4855657 | 904691 | 100.000 | 100.000  |
| Total |           | 4855657 | 904691 | 100.000 | 100.000  |



<sup>1</sup>H NMR, <sup>13</sup>C NMR and HPLC spectra of compound 10ac

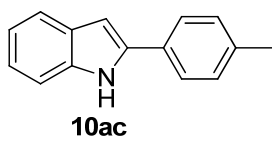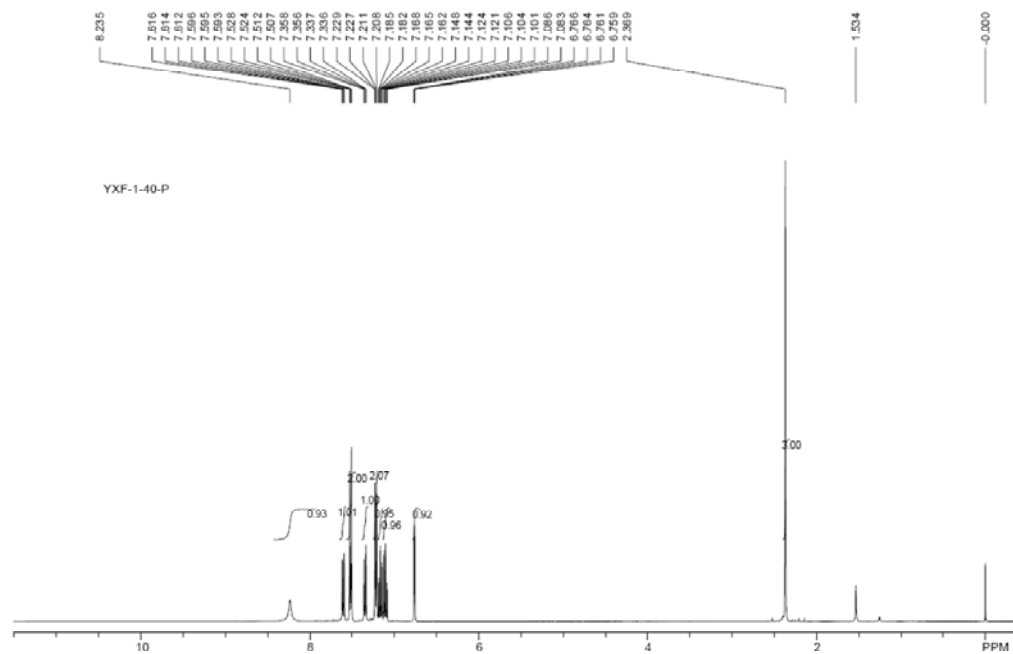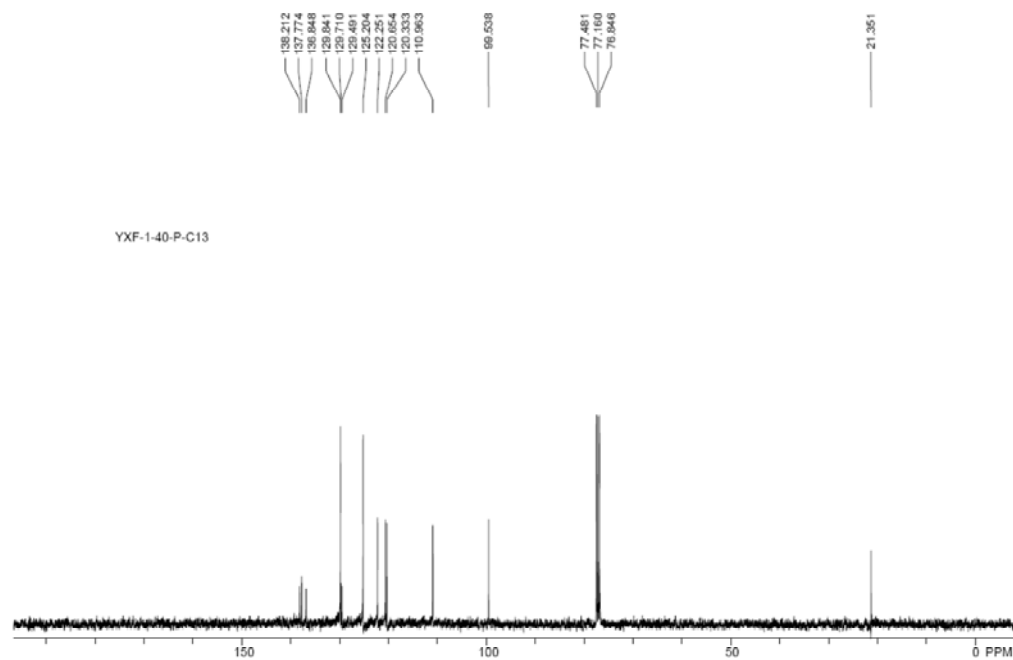

==== Shimadzu LCsolution Analysis Report ====

C:\LabSolutions\LCsolution\Sun\YXF\YXF-1-40-P.lcd  
 Sample Name : YXF-1-40-P  
 Tray# : 1  
 Vial # : 31  
 Injection Volume : 5 uL  
 Data File Name : YXF-1-40-P.lcd  
 Method File Name : SDQ.gradient.lcm  
 Batch File Name :  
 Data Acquired : 11/7/2011 12:47:28 PM

<Chromatogram>

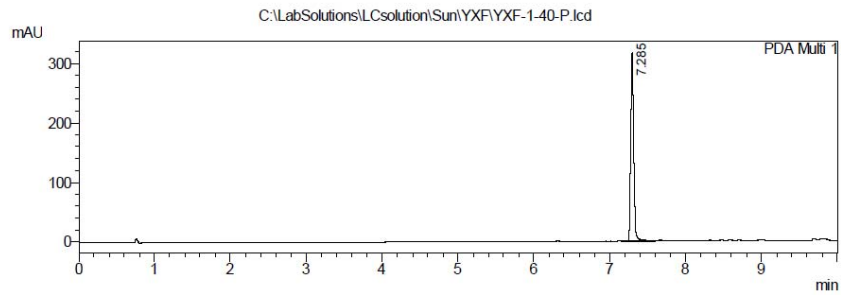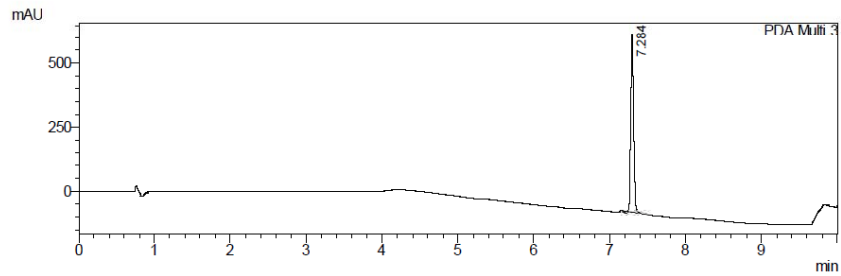

- 1 PDA Multi 1/254nm 4nm
- 2 PDA Multi 3/220nm 4nm

PeakTable

PDA Ch1 254nm 4nm

| Peak# | Ret. Time | Area   | Height | Area %  | Height % |
|-------|-----------|--------|--------|---------|----------|
| 1     | 7.285     | 797835 | 316154 | 100.000 | 100.000  |
| Total |           | 797835 | 316154 | 100.000 | 100.000  |

PeakTable

PDA Ch3 220nm 4nm

| Peak# | Ret. Time | Area    | Height | Area %  | Height % |
|-------|-----------|---------|--------|---------|----------|
| 1     | 7.284     | 1658359 | 694052 | 100.000 | 100.000  |
| Total |           | 1658359 | 694052 | 100.000 | 100.000  |

<sup>1</sup>H NMR, <sup>13</sup>C NMR and HPLC spectra of compound 10ad

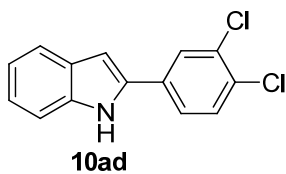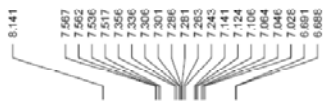

YXF-1-18-P

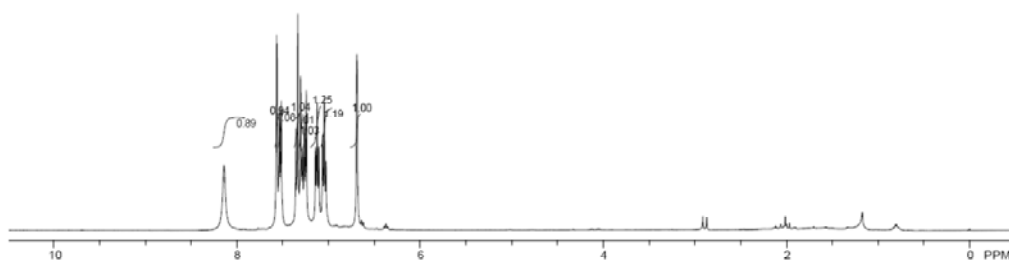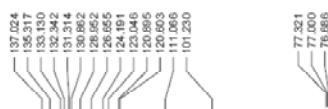

YXF-1-18-P-C13

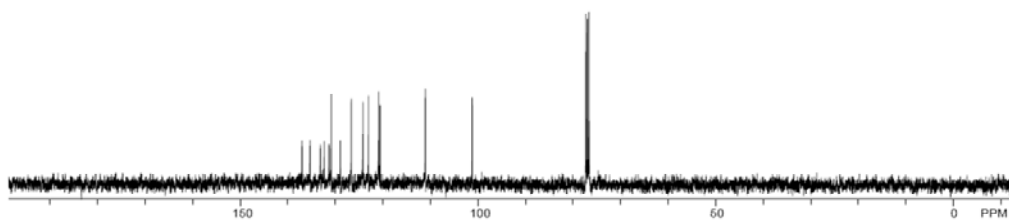

==== Shimadzu LCsolution Analysis Report ====

C:\LabSolutions\LCsolution\Sun\YXF\YXF-1-18-P.lcd  
 Sample Name : YXF-1-18-P  
 Tray# : 1  
 Vial # : 17  
 Injection Volume : 3 uL  
 Data File Name : YXF-1-18-P.lcd  
 Method File Name : SDQ gradient.lcm  
 Batch File Name :  
 Data Acquired : 10/3/2011 4:23:41 PM

<Chromatogram>

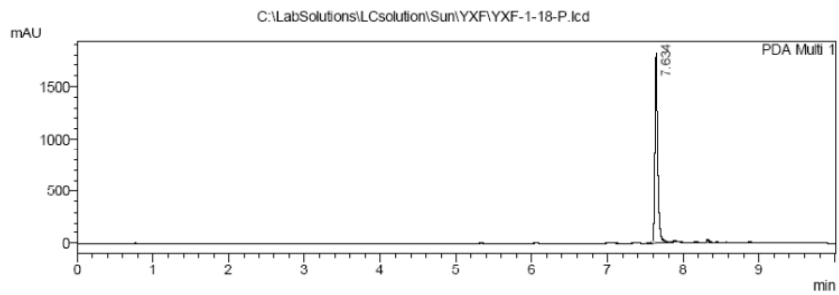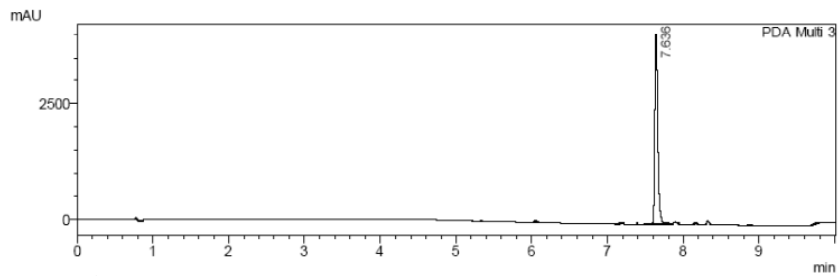

- 1 PDA Multi 1/254nm 4nm
- 2 PDA Multi 3/220nm 4nm

PeakTable

PDA Ch1 254nm 4nm

| Peak# | Ret. Time | Area    | Height  | Area %  | Height % |
|-------|-----------|---------|---------|---------|----------|
| 1     | 7.634     | 4661829 | 1780432 | 100.000 | 100.000  |
| Total |           | 4661829 | 1780432 | 100.000 | 100.000  |

PeakTable

PDA Ch3 220nm 4nm

| Peak# | Ret. Time | Area     | Height  | Area %  | Height % |
|-------|-----------|----------|---------|---------|----------|
| 1     | 7.636     | 11303408 | 4091729 | 100.000 | 100.000  |
| Total |           | 11303408 | 4091729 | 100.000 | 100.000  |

<sup>1</sup>H NMR, <sup>13</sup>C NMR and HPLC spectra of compound 10ae

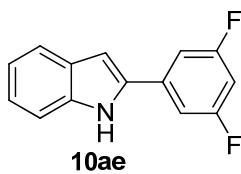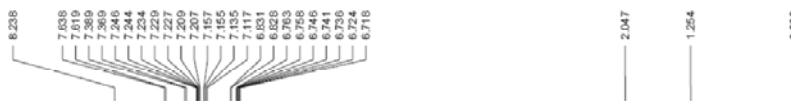

YXF-1-19-Pure

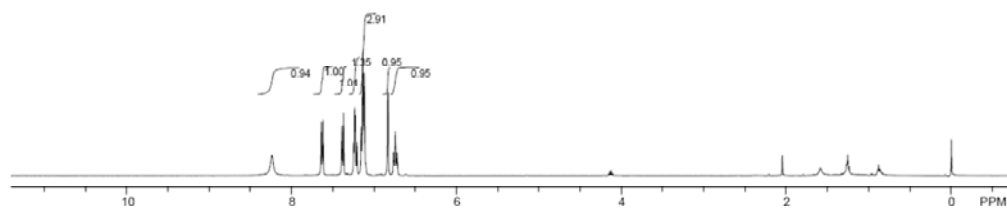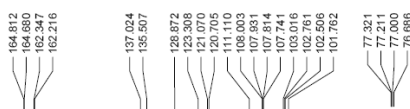

YXF-1-19-Pure-C13

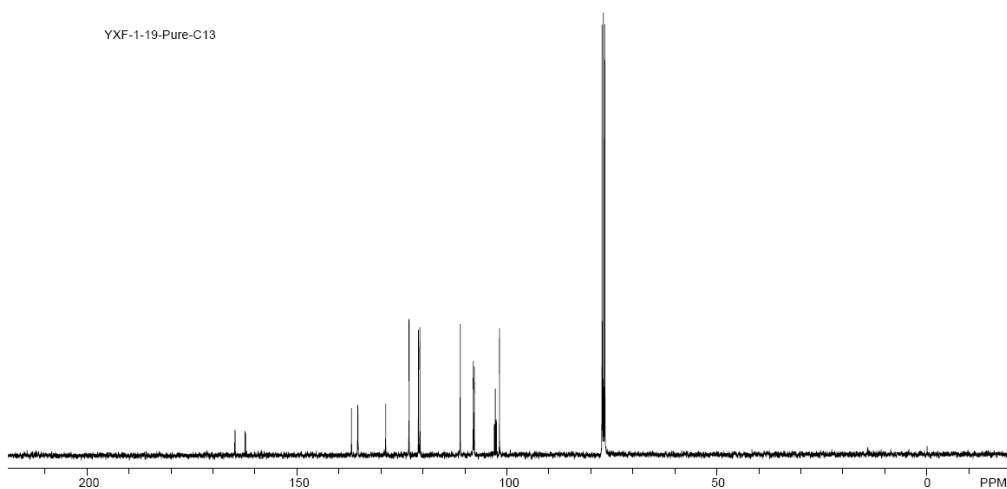

==== Shimadzu LCsolution Analysis Report ====

C:\LabSolutions\LCsolution\Sun\YXF\YXF-1-19-P.lcd  
 Sample Name : YXF-1-19-P  
 Tray# : 1  
 Vial # : 16  
 Injection Volume : 5 uL  
 Data File Name : YXF-1-19-P.lcd  
 Method File Name : SDQ gradient.lcm  
 Batch File Name :  
 Data Acquired : 10/11/2011 3:31:35 PM

<Chromatogram>

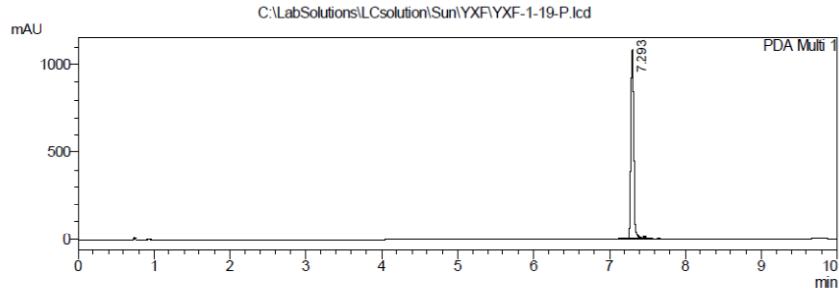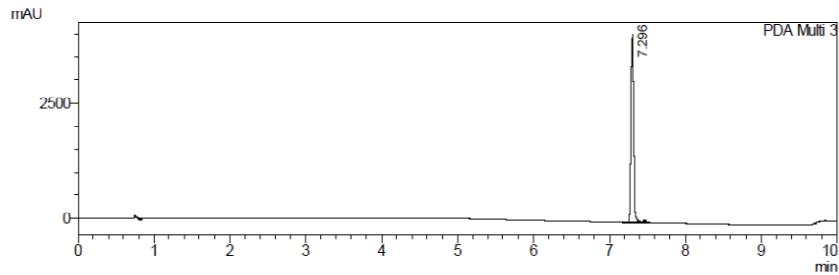

- 1 PDA Multi 1/254nm 4nm
- 2 PDA Multi 3/220nm 4nm

PeakTable

PDA Ch1 254nm 4nm

| Peak# | Ret. Time | Area    | Height  | Area %  | Height % |
|-------|-----------|---------|---------|---------|----------|
| 1     | 7.293     | 2763204 | 1082975 | 100.000 | 100.000  |
| Total |           | 2763204 | 1082975 | 100.000 | 100.000  |

PeakTable

PDA Ch3 220nm 4nm

| Peak# | Ret. Time | Area    | Height  | Area %  | Height % |
|-------|-----------|---------|---------|---------|----------|
| 1     | 7.296     | 9535136 | 4068002 | 100.000 | 100.000  |
| Total |           | 9535136 | 4068002 | 100.000 | 100.000  |

<sup>1</sup>H NMR, <sup>13</sup>C NMR and HPLC spectra of compound 10ae'

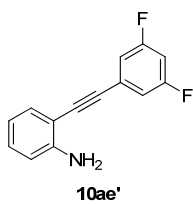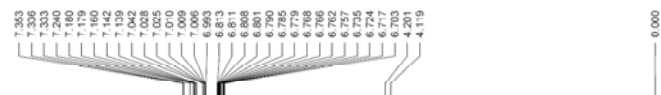

YXF-2-49-II-P

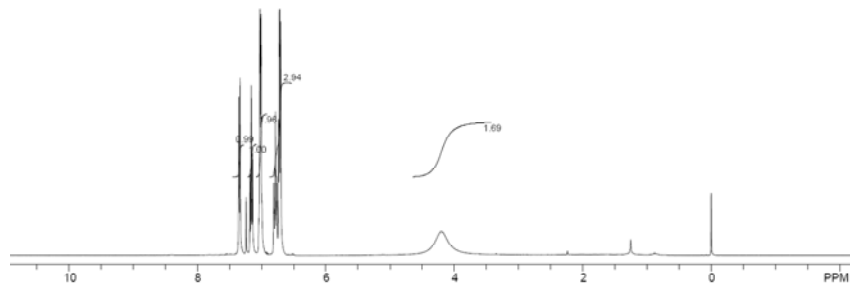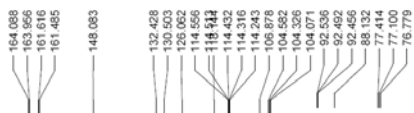

YXF-2-49-II-P-C13

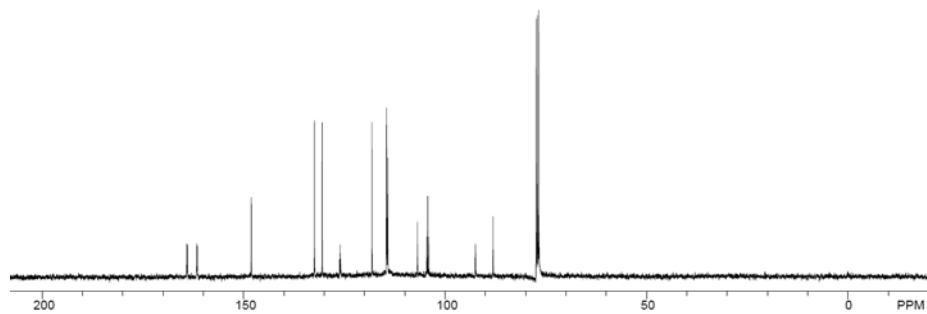

==== Shimadzu LCsolution Analysis Report ====

C:\LabSolutions\LCsolution\Sun\YXF\YXF-1-19-M.lcd  
 Sample Name : YXF-1-19-M  
 Tray# : 1  
 Vial# : 3  
 Injection Volume : 10 uL  
 Data File Name : YXF-1-19-M.lcd  
 Method File Name : SDQ gradient.lcm  
 Batch File Name : Batch 1.lcb  
 Data Acquired : 10/7/2011 9:30:42 AM

<Chromatogram>

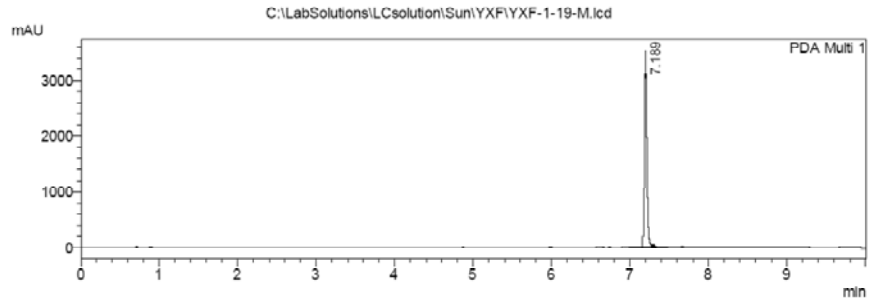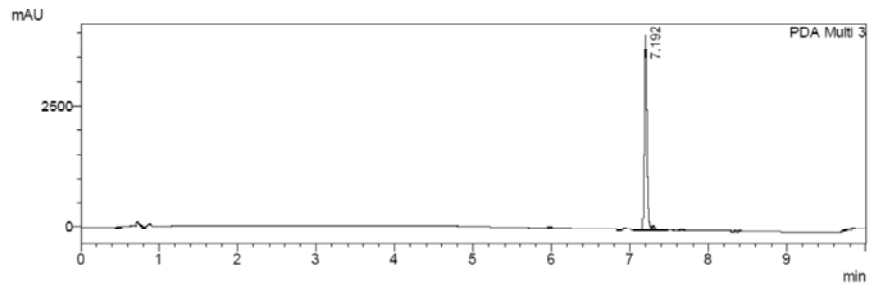

- 1 PDA Multi 1/254nm 4nm
- 2 PDA Multi 3/220nm 4nm

PeakTable

| PDA Ch1 254nm 4nm |           |         |         |         |          |
|-------------------|-----------|---------|---------|---------|----------|
| Peak#             | Ret. Time | Area    | Height  | Area %  | Height % |
| 1                 | 7.189     | 7326546 | 3411179 | 100.000 | 100.000  |
| Total             |           | 7326546 | 3411179 | 100.000 | 100.000  |

PeakTable

| PDA Ch3 220nm 4nm |           |         |         |         |          |
|-------------------|-----------|---------|---------|---------|----------|
| Peak#             | Ret. Time | Area    | Height  | Area %  | Height % |
| 1                 | 7.192     | 9080215 | 3967240 | 100.000 | 100.000  |
| Total             |           | 9080215 | 3967240 | 100.000 | 100.000  |

C:\LabSolutions\LCsolution\Sun\YXF\YXF-1-19-M.lcd



<sup>1</sup>H NMR, <sup>13</sup>C NMR and HPLC spectra of compound 10af

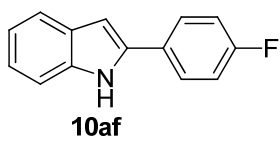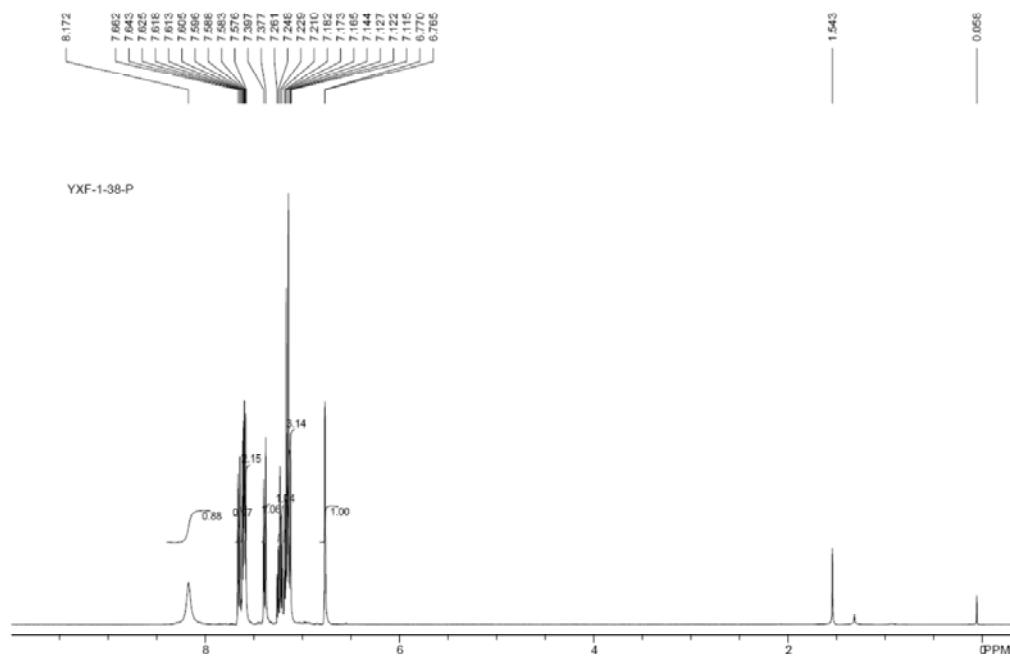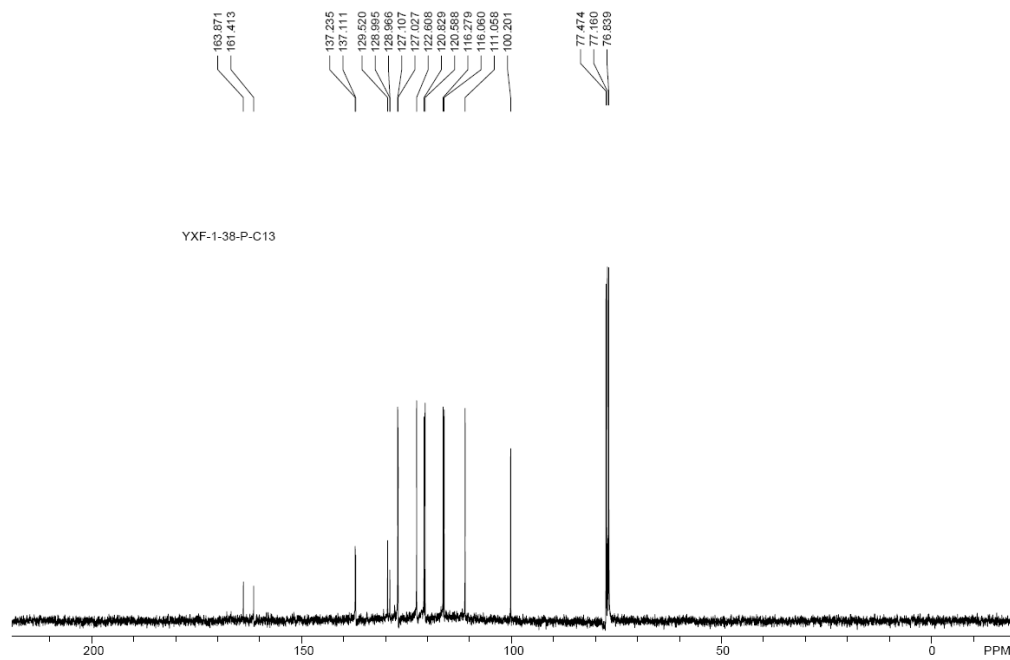

==== Shimadzu LCsolution Analysis Report ====

Sample Name : YXF-1-38-P  
 Tray# : 1  
 Vial # : 31  
 Injection Volume : 5 uL  
 Data File Name : YXF-1-38-P.lcd  
 Method File Name : SDQ gradient.lcm  
 Batch File Name :  
 Data Acquired : 11/3/2011 12:07:32 PM

<Chromatogram>

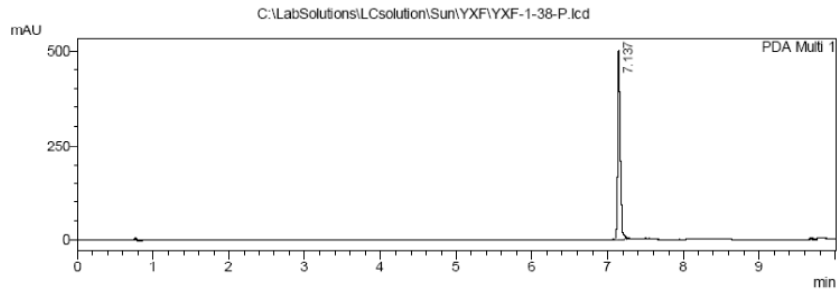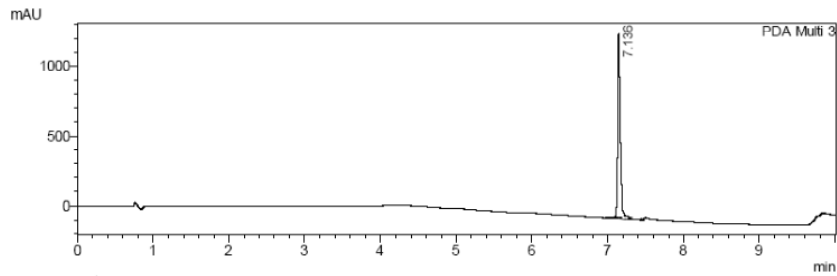

- 1 PDA Multi 1/254nm 4nm
- 2 PDA Multi 3/220nm 4nm

PeakTable

| Peak# | Ret. Time | Area    | Height | Area %  | Height % |
|-------|-----------|---------|--------|---------|----------|
| 1     | 7.137     | 1256218 | 488189 | 100.000 | 100.000  |
| Total |           | 1256218 | 488189 | 100.000 | 100.000  |

PeakTable

| Peak# | Ret. Time | Area    | Height  | Area %  | Height % |
|-------|-----------|---------|---------|---------|----------|
| 1     | 7.136     | 3266849 | 1314428 | 100.000 | 100.000  |
| Total |           | 3266849 | 1314428 | 100.000 | 100.000  |

<sup>1</sup>H NMR, <sup>13</sup>C NMR and HPLC spectra of compound 10ag

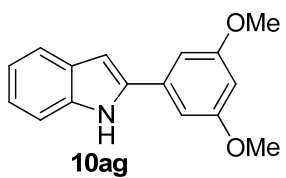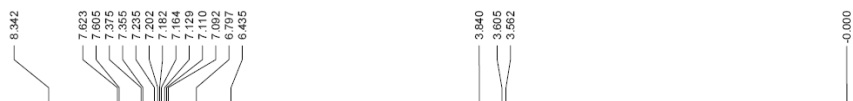

YXF-1-20-P

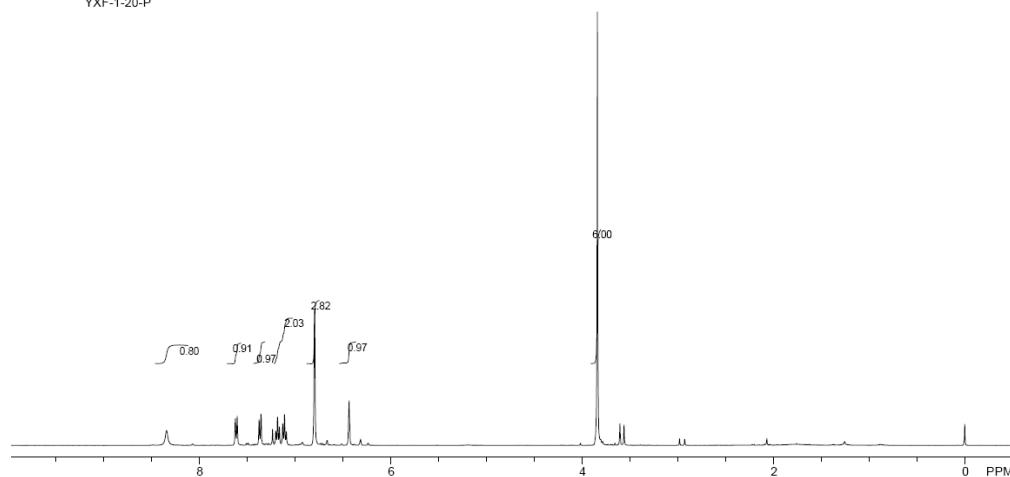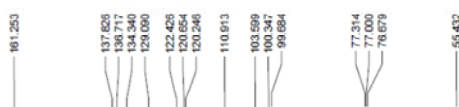

YXF-1-20 Pure C13

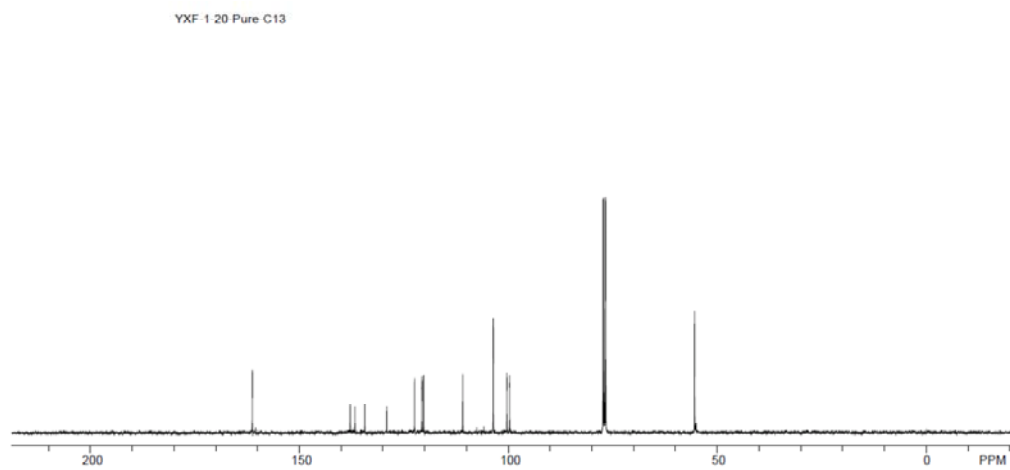

==== Shimadzu LCsolution Analysis Report ====

C:\LabSolutions\LCsolution\Sun\YXF\YXF-1-20-P.lcd  
 Sample Name : YXF-1-20-P  
 Tray# : 1  
 Vail # : 1  
 Injection Volume : 5 uL  
 Data File Name : YXF-1-20-P.lcd  
 Method File Name : SDQ gradient.lcm  
 Batch File Name : Batch 1.lcb  
 Data Acquired : 10/11/2011 12:15:28 PM

<Chromatogram>

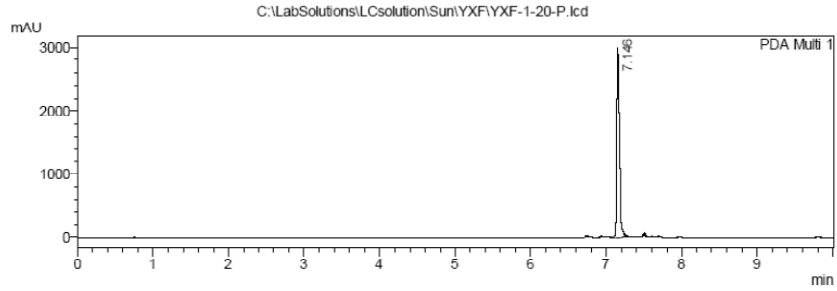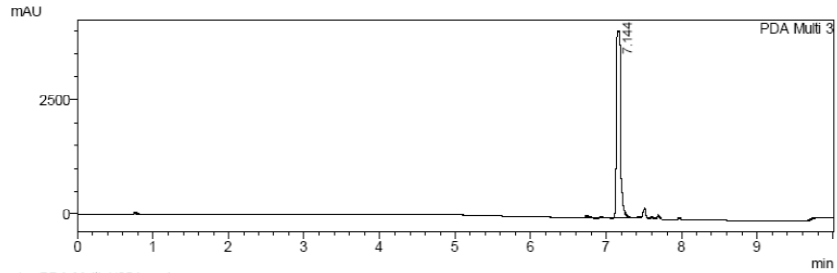

- 1 PDA Multi 1/254nm 4nm
- 2 PDA Multi 3/220nm 4nm

PeakTable

PDA Ch1 254nm 4nm

| Peak#        | Ret. Time | Area    | Height  | Area %  | Height % |
|--------------|-----------|---------|---------|---------|----------|
| 1            | 7.146     | 7233514 | 2885804 | 100.000 | 100.000  |
| <b>Total</b> |           | 7233514 | 2885804 | 100.000 | 100.000  |

PeakTable

PDA Ch3 220nm 4nm

| Peak#        | Ret. Time | Area     | Height  | Area %  | Height % |
|--------------|-----------|----------|---------|---------|----------|
| 1            | 7.144     | 16629064 | 4079232 | 100.000 | 100.000  |
| <b>Total</b> |           | 16629064 | 4079232 | 100.000 | 100.000  |

<sup>1</sup>H NMR, <sup>13</sup>C NMR and HPLC spectra of compound 10ah

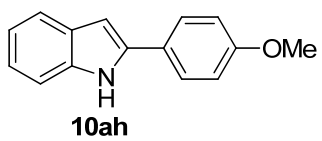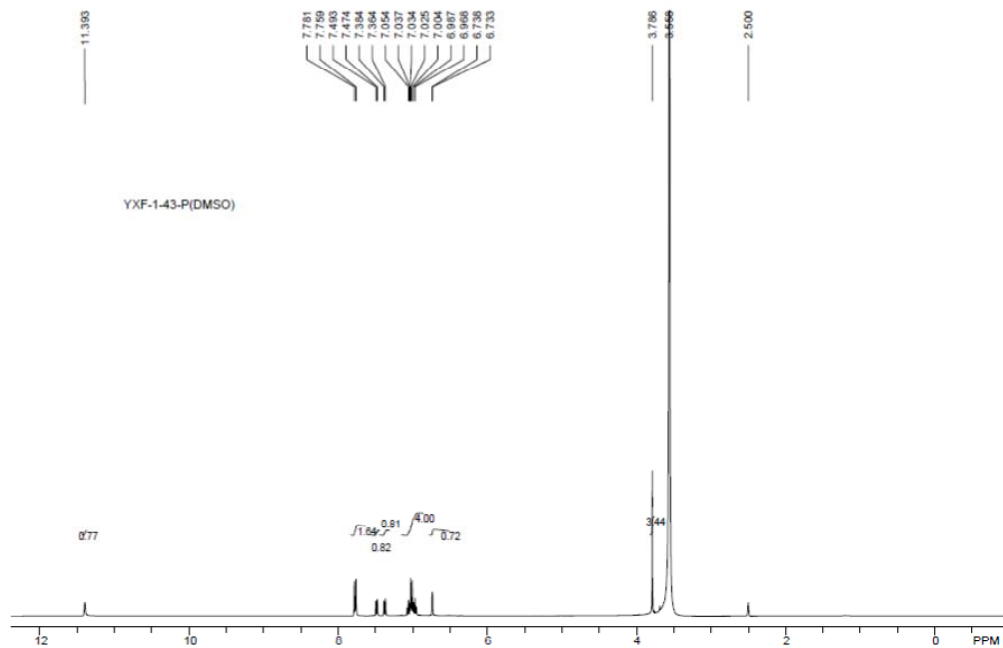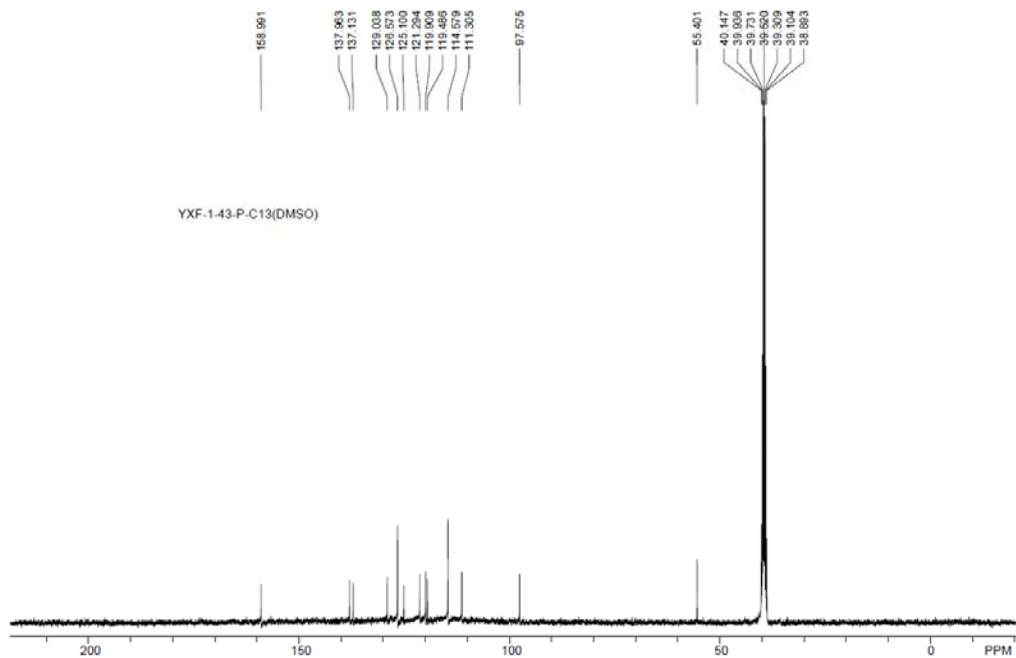

==== Shimadzu LCsolution Analysis Report ====

C:\LabSolutions\LCsolution\Sun\YXF\YXF-1-43-P.lcd  
 Sample Name : YXF-1-43-P  
 Tray# : 1  
 Vial # : 32  
 Injection Volume : 5 uL  
 Data File Name : YXF-1-43-P.lcd  
 Method File Name : SDQ gradient.lcm  
 Batch File Name : Batch 1.lcb  
 Data Acquired : 11/9/2011 2:20:58 PM

<Chromatogram>

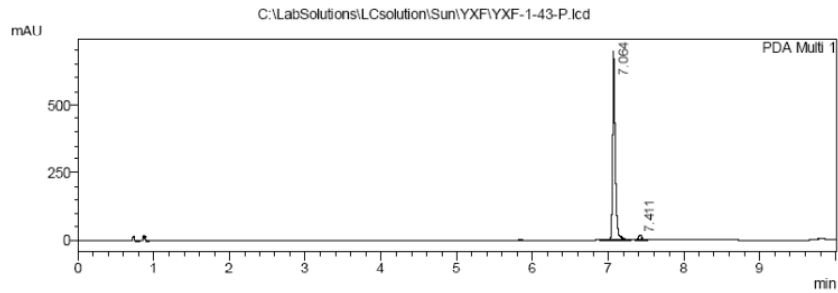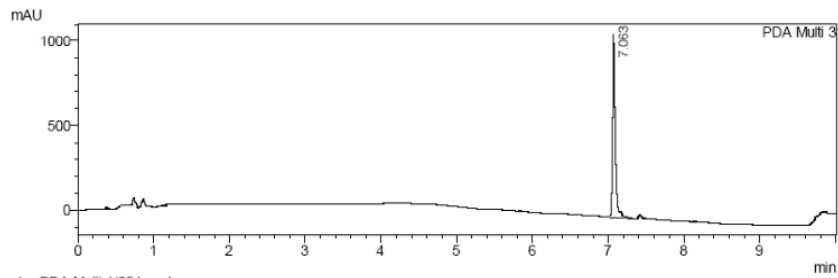

- 1 PDA Multi 1/254nm 4nm
- 2 PDA Multi 3/220nm 4nm

PeakTable

PDA Ch1 254nm 4nm

| Peak#        | Ret. Time | Area           | Height        | Area %         | Height %       |
|--------------|-----------|----------------|---------------|----------------|----------------|
| 1            | 7.064     | 1756966        | 675327        | 97.761         | 97.631         |
| 2            | 7.411     | 40232          | 16389         | 2.239          | 2.369          |
| <b>Total</b> |           | <b>1797198</b> | <b>691716</b> | <b>100.000</b> | <b>100.000</b> |

PeakTable

PDA Ch3 220nm 4nm

| Peak#        | Ret. Time | Area           | Height         | Area %         | Height %       |
|--------------|-----------|----------------|----------------|----------------|----------------|
| 1            | 7.063     | 2750751        | 1078590        | 100.000        | 100.000        |
| <b>Total</b> |           | <b>2750751</b> | <b>1078590</b> | <b>100.000</b> | <b>100.000</b> |

<sup>1</sup>H NMR, <sup>13</sup>C NMR and HPLC spectra of compound 10ai

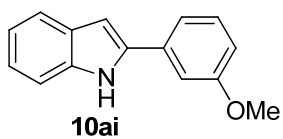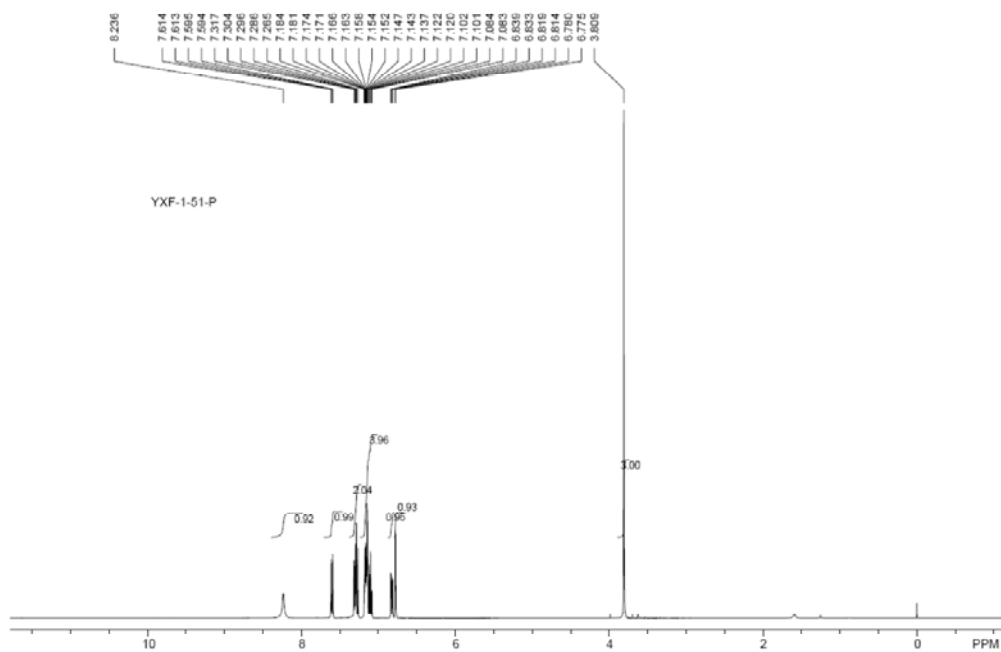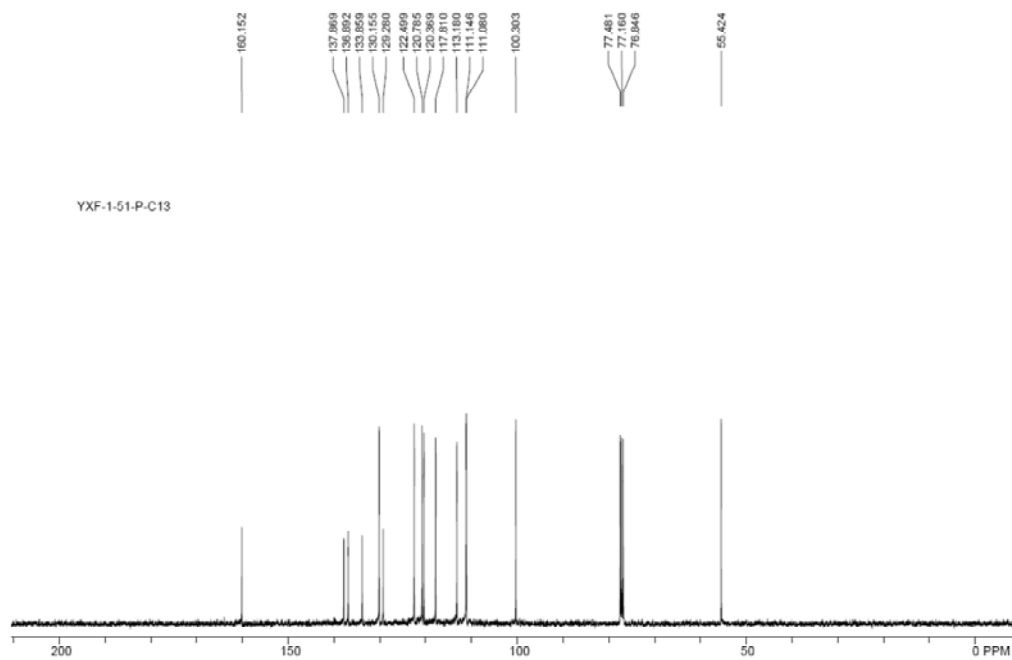

==== Shimadzu LCsolution Analysis Report ====

C:\LabSolutions\LCsolution\Sun\YXF\YXF-1-51-P.lcd  
 Sample Name : YXF-1-51-P  
 Tray# : 1  
 Vial # : 31  
 Injection Volume : 5 uL  
 Data File Name : YXF-1-51-P.lcd  
 Method File Name : SDQ gradient.lcm  
 Batch File Name :  
 Data Acquired : 11/17/2011 4:29:29 PM

<Chromatogram>

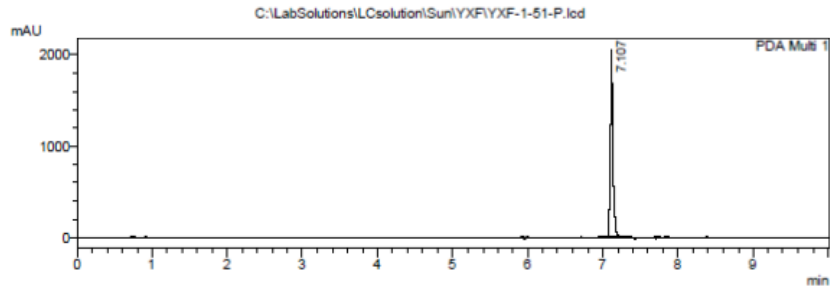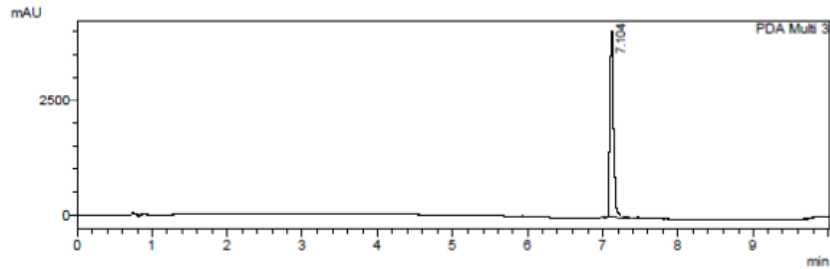

- 1 PDA Multi 1/254nm 4nm
- 2 PDA Multi 3/220nm 4nm

PeakTable

PDA Ch1 254nm 4nm

| Peak# | Ret. Time | Area    | Height  | Area %  | Height % |
|-------|-----------|---------|---------|---------|----------|
| 1     | 7.107     | 5088913 | 2020372 | 100.000 | 100.000  |
| Total |           | 5088913 | 2020372 | 100.000 | 100.000  |

PeakTable

PDA Ch3 220nm 4nm

| Peak# | Ret. Time | Area     | Height  | Area %  | Height % |
|-------|-----------|----------|---------|---------|----------|
| 1     | 7.104     | 14076706 | 4050339 | 100.000 | 100.000  |
| Total |           | 14076706 | 4050339 | 100.000 | 100.000  |



<sup>1</sup>H NMR, <sup>13</sup>C NMR and HPLC spectra of compound 10aj

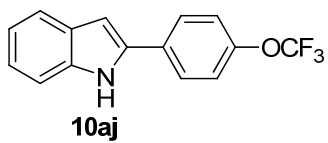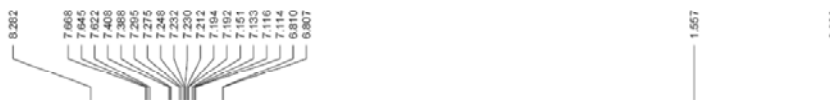

YXF-1-21-P1

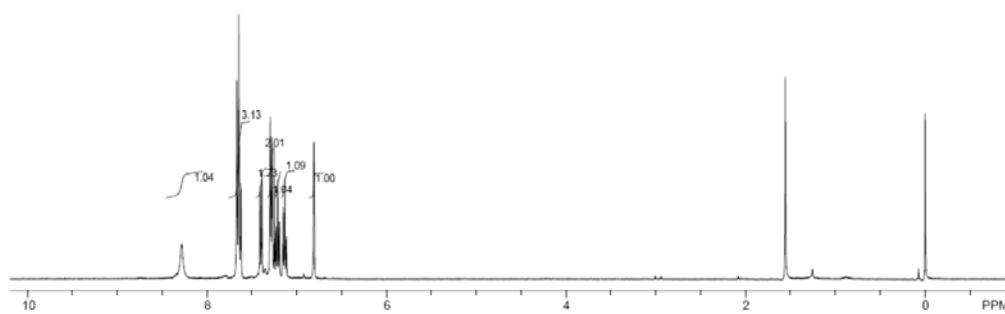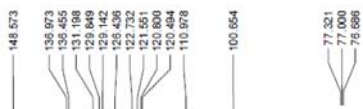

YXF-1-21-P2-C13

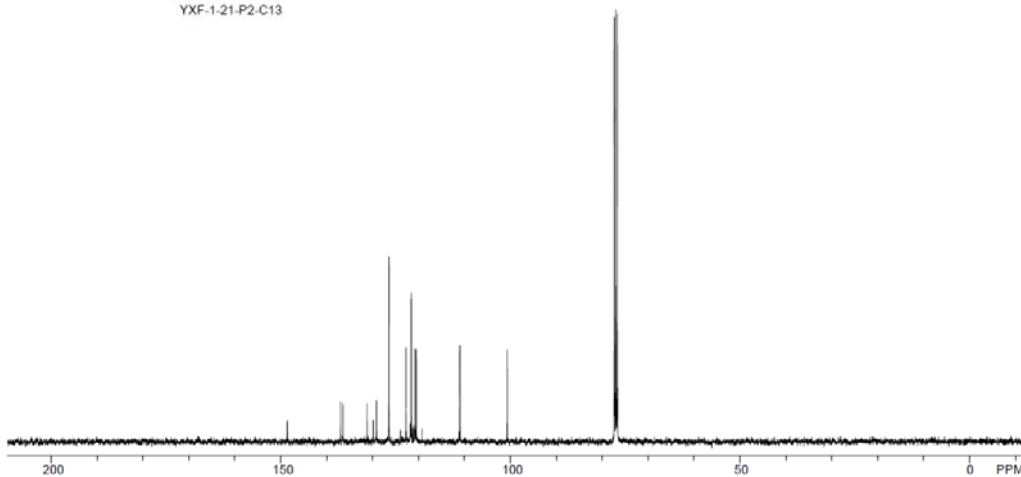

==== Shimadzu LCsolution Analysis Report ====

C:\LabSolutions\LCsolution\Sun\YXF\YXF-1-21-P1.lcd  
 Sample Name : YXF-1-21-P1  
 Tray# : 1  
 Vial # : 2  
 Injection Volume : 5 uL  
 Data File Name : YXF-1-21-P1.lcd  
 Method File Name : SDQ gradient.lcm  
 Batch File Name : Batch 1.lcb  
 Data Acquired : 10/11/2011 12:25:56 PM

<Chromatogram>

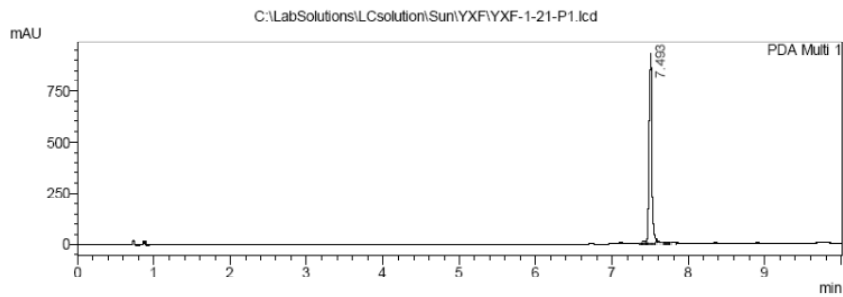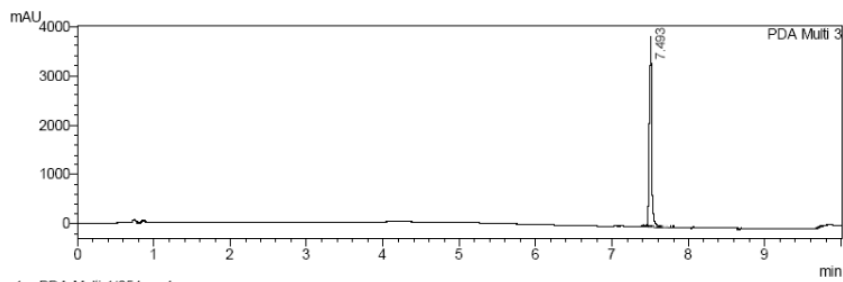

- 1 PDA Multi 1/254nm 4nm
- 2 PDA Multi 3/220nm 4nm

PeakTable

PDA Ch1 254nm 4nm

| Peak# | Ret. Time | Area    | Height | Area %  | Height % |
|-------|-----------|---------|--------|---------|----------|
| 1     | 7.493     | 2306778 | 917006 | 100.000 | 100.000  |
| Total |           | 2306778 | 917006 | 100.000 | 100.000  |

PeakTable

PDA Ch3 220nm 4nm

| Peak# | Ret. Time | Area    | Height  | Area %  | Height % |
|-------|-----------|---------|---------|---------|----------|
| 1     | 7.493     | 7768328 | 3837394 | 100.000 | 100.000  |
| Total |           | 7768328 | 3837394 | 100.000 | 100.000  |

<sup>1</sup>H NMR, <sup>13</sup>C NMR and HPLC spectra of compound 10ak

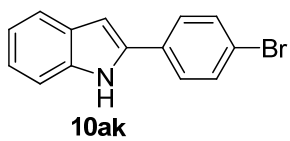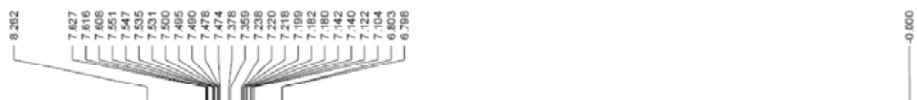

YXF-1-29-Pure

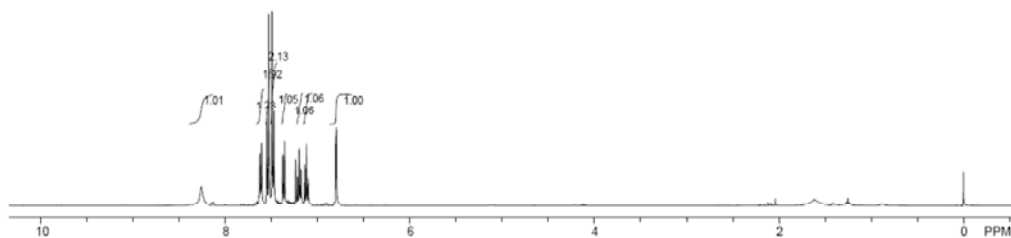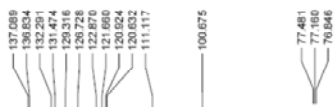

YXF-1-29-Pure-C13

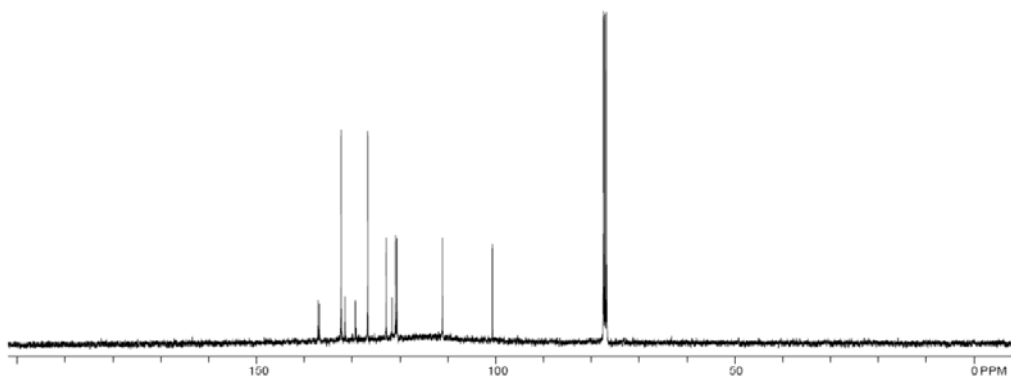

==== Shimadzu LCsolution Analysis Report ====

C:\LabSolutions\LCsolution\Sun\YXF\YXF-1-29-P.lcd  
 Sample Name : YXF-1-29-P  
 Tray# : 1  
 Vail # : 31  
 Injection Volume : 5 uL  
 Data File Name : YXF-1-29-P.lcd  
 Method File Name : SDQ gradient.lcm  
 Batch File Name :  
 Data Acquired : 3/1/2012 5:08:00 PM

<Chromatogram>

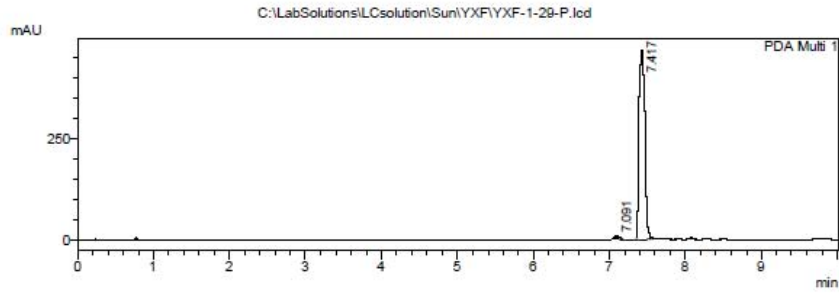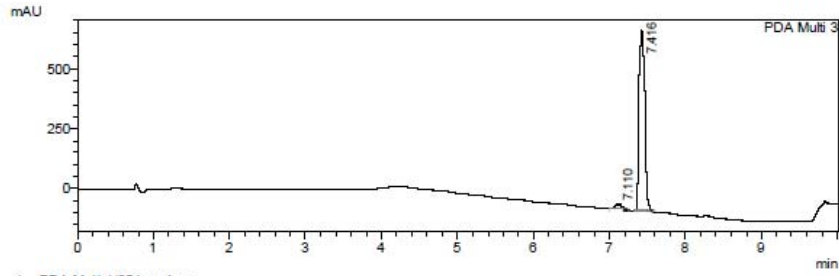

- 1 PDA Multi 1/254nm 4nm
- 2 PDA Multi 3/220nm 4nm

PeakTable

| Peak# | Ret. Time | Area    | Height | Area %  | Height % |
|-------|-----------|---------|--------|---------|----------|
| 1     | 7.091     | 28183   | 6219   | 1.125   | 1.319    |
| 2     | 7.417     | 2477413 | 465286 | 98.875  | 98.681   |
| Total |           | 2505596 | 471505 | 100.000 | 100.000  |

PeakTable

| Peak# | Ret. Time | Area    | Height | Area %  | Height % |
|-------|-----------|---------|--------|---------|----------|
| 1     | 7.110     | 139509  | 21795  | 3.420   | 2.822    |
| 2     | 7.416     | 3940148 | 750546 | 96.580  | 97.178   |
| Total |           | 4079657 | 772342 | 100.000 | 100.000  |

# <sup>1</sup>H NMR, <sup>13</sup>C NMR and HPLC spectra of compound 10al

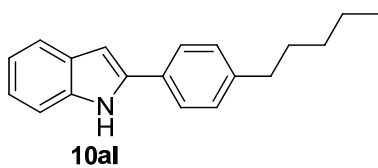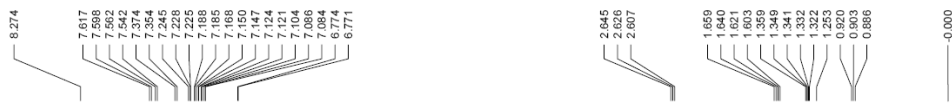

yxf-1-30-P-P

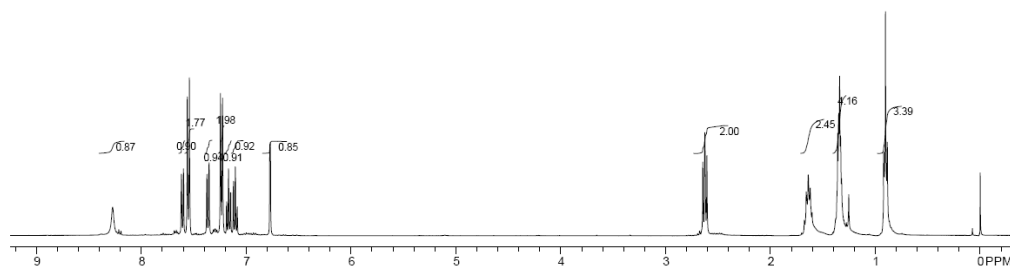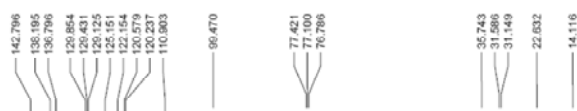

YXF-1-30-Pure-C13

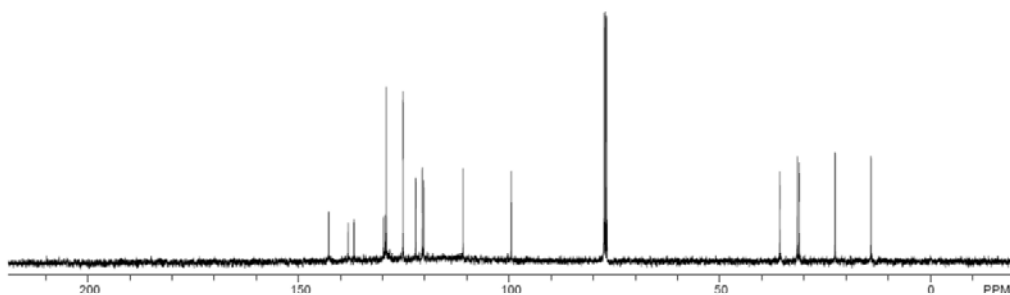

### ==== Shimadzu LCsolution Analysis Report ====

C:\LabSolutions\LCsolution\Sun\YXF\YXF-1-30-P.lcd  
 Sample Name : YXF-1-30-P  
 Tray# : 1  
 Vial# : 31  
 Injection Volume : 3 uL  
 Data File Name : YXF-1-30-P.lcd  
 Method File Name : SDQ gradient.lcm  
 Batch File Name :  
 Data Acquired : 2/29/2012 1:52:43 PM

#### <Chromatogram>

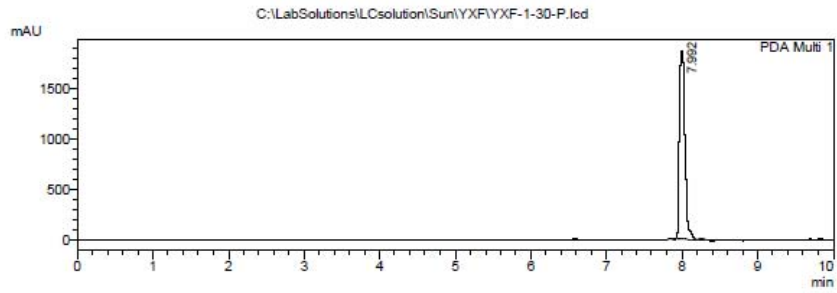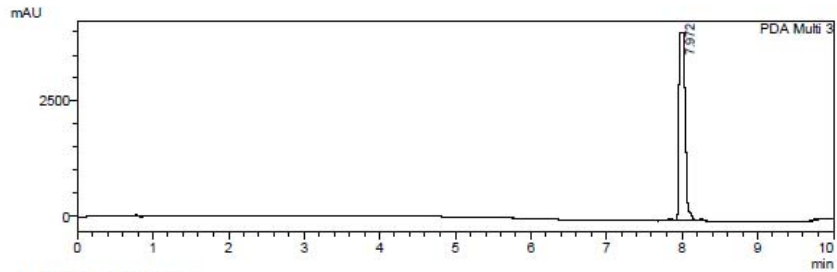

- 1 PDA Multi 1/254nm 4nm  
 2 PDA Multi 3/220nm 4nm

PeakTable

PDA Ch1 254nm 4nm

| Peak# | Ret. Time | Area    | Height  | Area %  | Height % |
|-------|-----------|---------|---------|---------|----------|
| 1     | 7.992     | 9715937 | 1859521 | 100.000 | 100.000  |
| Total |           | 9715937 | 1859521 | 100.000 | 100.000  |

PeakTable

PDA Ch3 220nm 4nm

| Peak# | Ret. Time | Area     | Height  | Area %  | Height % |
|-------|-----------|----------|---------|---------|----------|
| 1     | 7.972     | 23808674 | 4075838 | 100.000 | 100.000  |
| Total |           | 23808674 | 4075838 | 100.000 | 100.000  |

C:\LabSolutions\LCsolution\Sun\YXF\YXF-1-30-P.lcd

# <sup>1</sup>H NMR, <sup>13</sup>C NMR and HPLC spectra of compound 10an

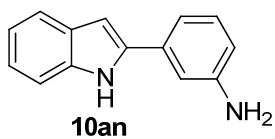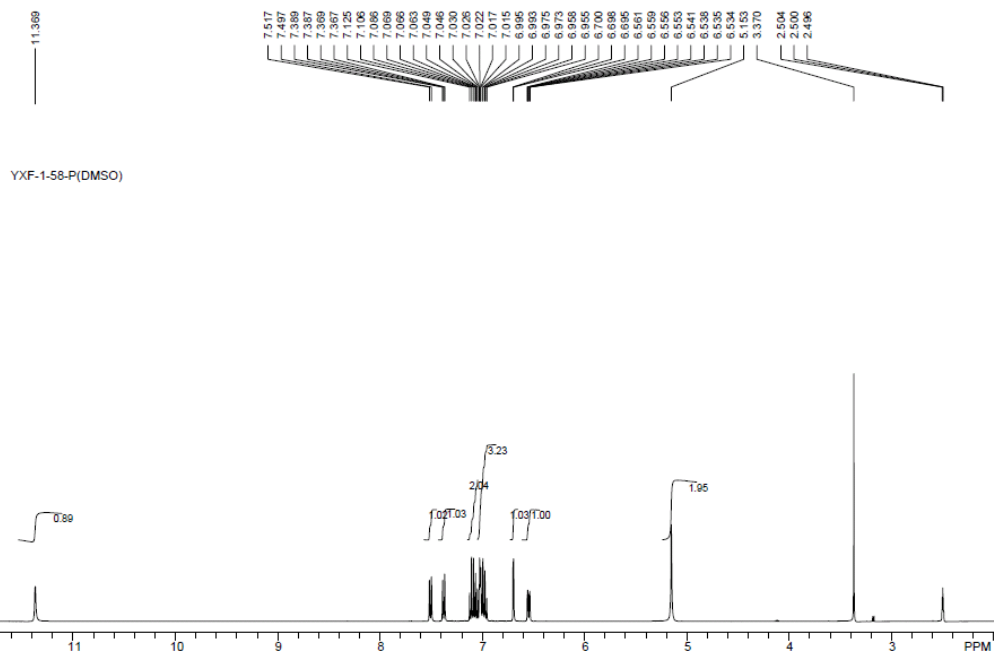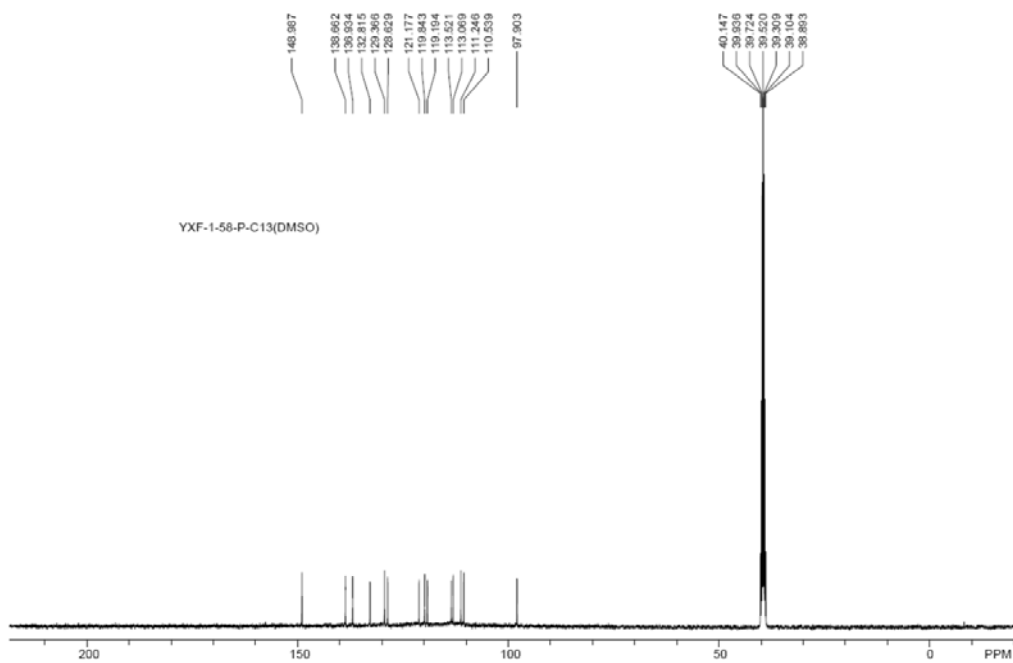

==== Shimadzu LCsolution Analysis Report ====

C:\LabSolutions\LCsolution\Sun\YXF\YXF-1-58-P.lcd  
 Sample Name : YXF-1-58-P  
 Tray# : 1  
 Vial # : 31  
 Injection Volume : 5 uL  
 Data File Name : YXF-1-58-P.lcd  
 Method File Name : SDQ gradient.lcm  
 Batch File Name :  
 Data Acquired : 11/28/2011 4:58:27 PM

<Chromatogram>

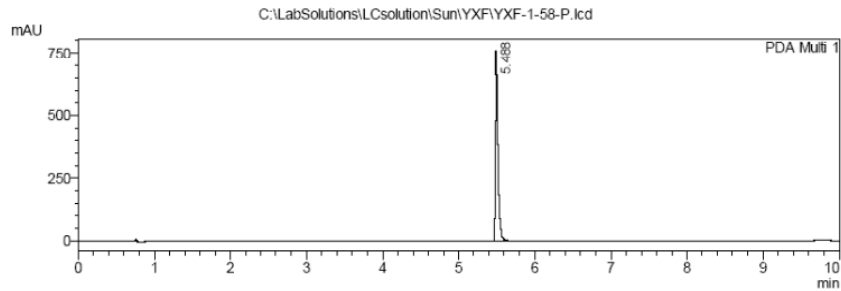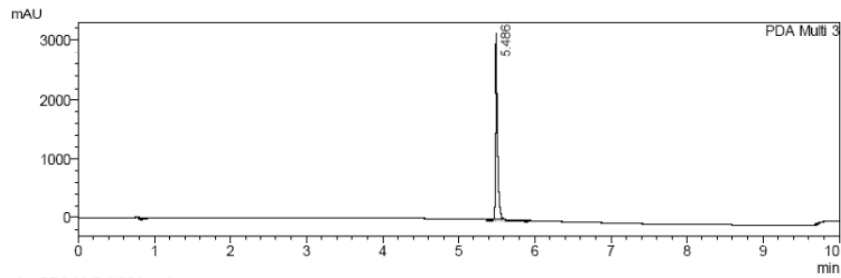

- 1 PDA Multi 1/254nm 4nm
- 2 PDA Multi 3/220nm 4nm

PeakTable

PDA Ch1 254nm 4nm

| Peak#        | Ret. Time | Area    | Height | Area %  | Height % |
|--------------|-----------|---------|--------|---------|----------|
| 1            | 5.488     | 1839902 | 733349 | 100.000 | 100.000  |
| <b>Total</b> |           | 1839902 | 733349 | 100.000 | 100.000  |

PeakTable

PDA Ch3 220nm 4nm

| Peak#        | Ret. Time | Area    | Height  | Area %  | Height % |
|--------------|-----------|---------|---------|---------|----------|
| 1            | 5.486     | 5740944 | 3141286 | 100.000 | 100.000  |
| <b>Total</b> |           | 5740944 | 3141286 | 100.000 | 100.000  |



<sup>1</sup>H NMR, <sup>13</sup>C NMR and HPLC spectra of compound 10ao

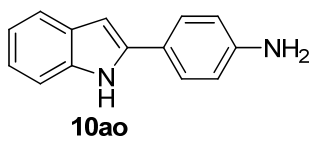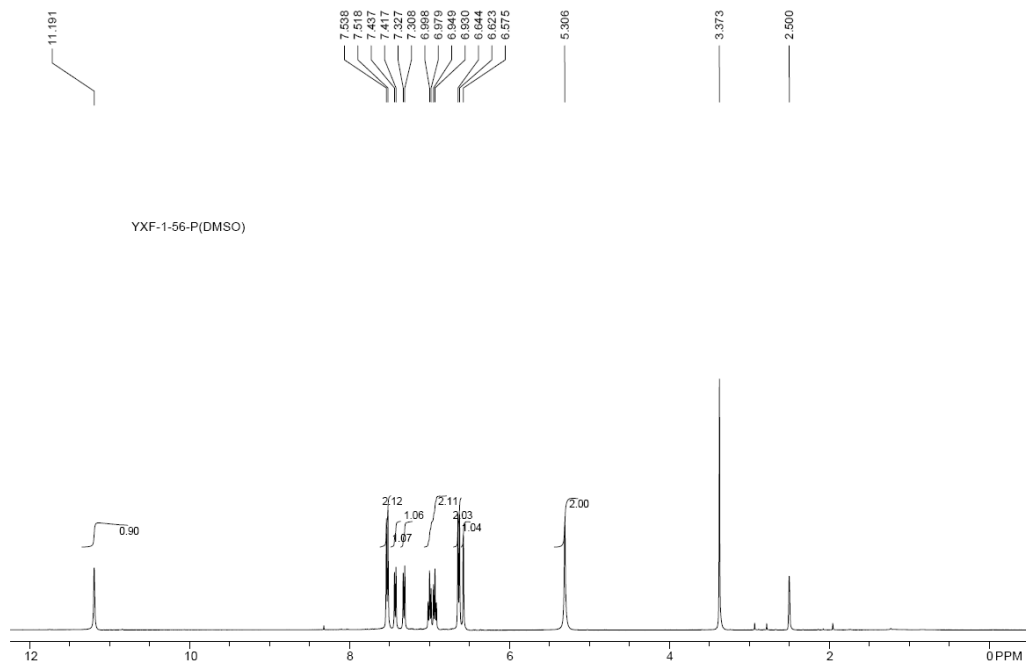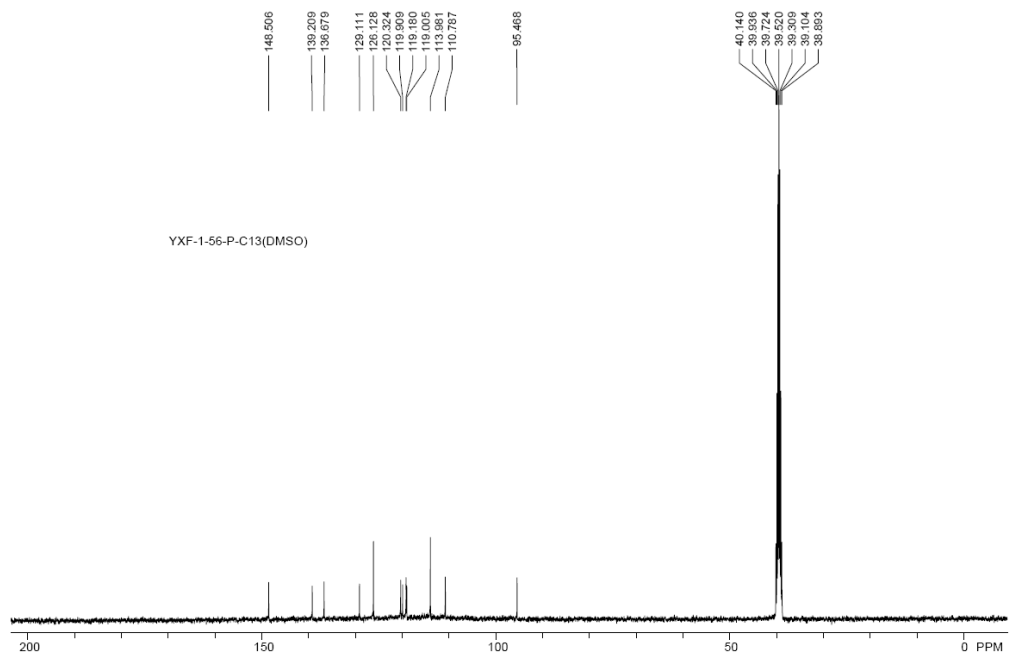

==== Shimadzu LCsolution Analysis Report ====

C:\LabSolutions\LCsolution\Sun\YXF\YXF-1-56-P.lcd  
 Sample Name : YXF-1-56-P  
 Tray# : 1  
 Vail # : 31  
 Injection Volume : 5 uL  
 Data File Name : YXF-1-56-P.lcd  
 Method File Name : SDQ gradient.lcm  
 Batch File Name :  
 Data Acquired : 11/25/2011 11:06:38 AM

<Chromatogram>

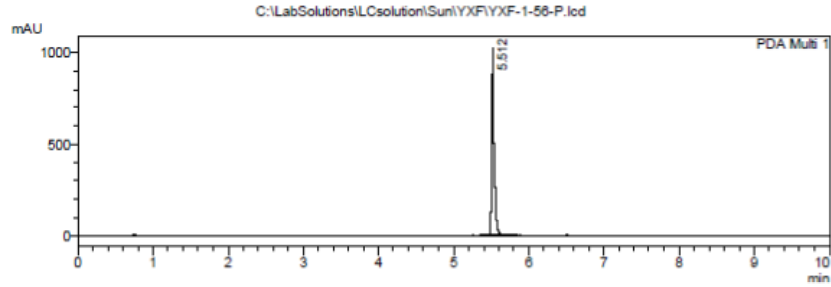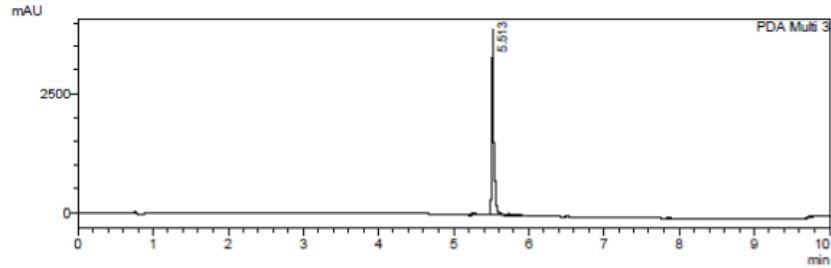

- 1 PDA Multi 1/254nm 4nm
- 2 PDA Multi 3/220nm 4nm

PeakTable

PDA Ch1 254nm 4nm

| Peak# | Ret. Time | Area    | Height | Area %  | Height % |
|-------|-----------|---------|--------|---------|----------|
| 1     | 5.512     | 2556906 | 986066 | 100.000 | 100.000  |
| Total |           | 2556906 | 986066 | 100.000 | 100.000  |

PeakTable

PDA Ch3 220nm 4nm

| Peak# | Ret. Time | Area    | Height  | Area %  | Height % |
|-------|-----------|---------|---------|---------|----------|
| 1     | 5.513     | 8245465 | 3892024 | 100.000 | 100.000  |
| Total |           | 8245465 | 3892024 | 100.000 | 100.000  |

<sup>1</sup>H NMR, <sup>13</sup>C NMR and HPLC spectra of compound 10ap

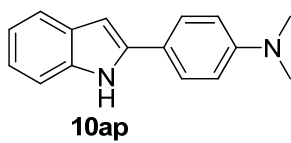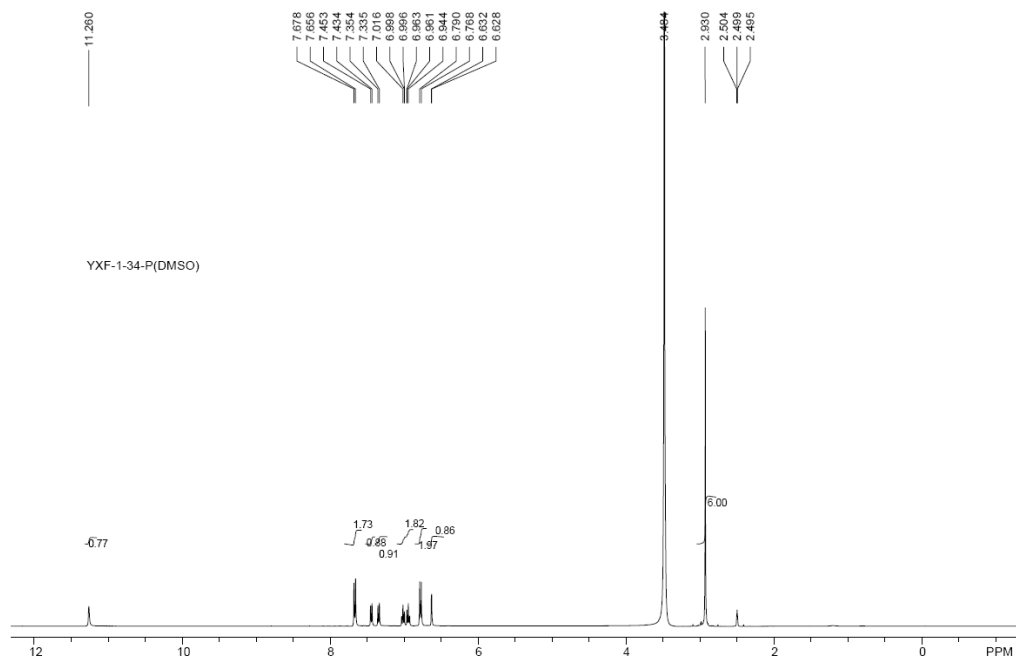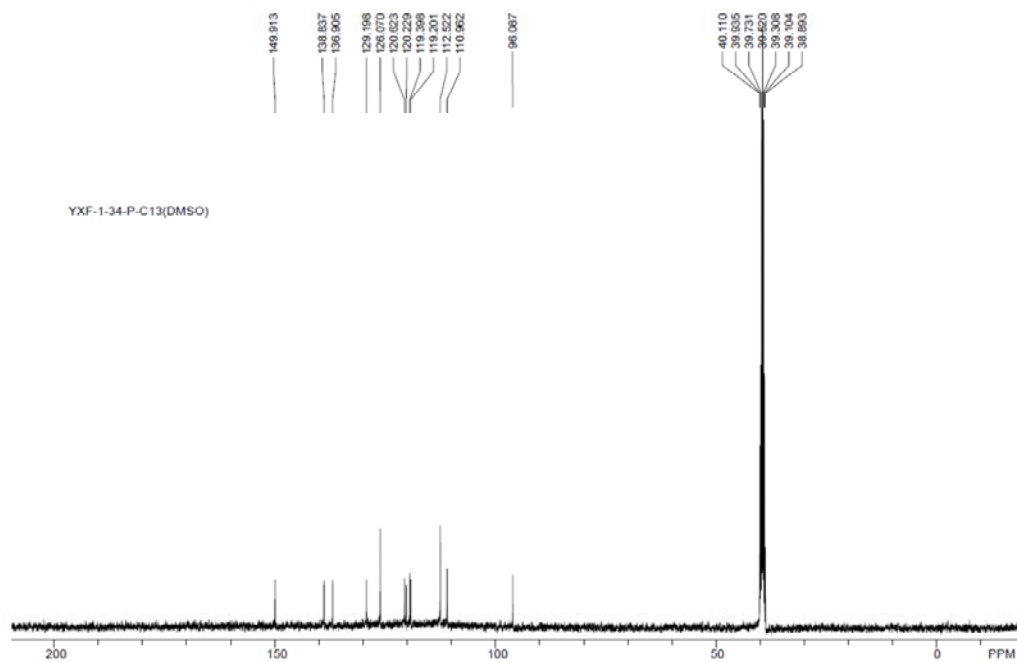

==== Shimadzu LCsolution Analysis Report ====

C:\LabSolutions\LCsolution\Sun\YXF\YXF-1-34-P.lcd  
 Sample Name : YXF-1-34-P  
 Tray# : 1  
 Vial # : 16  
 Injection Volume : 5 uL  
 Data File Name : YXF-1-34-P.lcd  
 Method File Name : SDQ gradient.lcm  
 Batch File Name :  
 Data Acquired : 10/28/2011 5:39:33 PM

<Chromatogram>

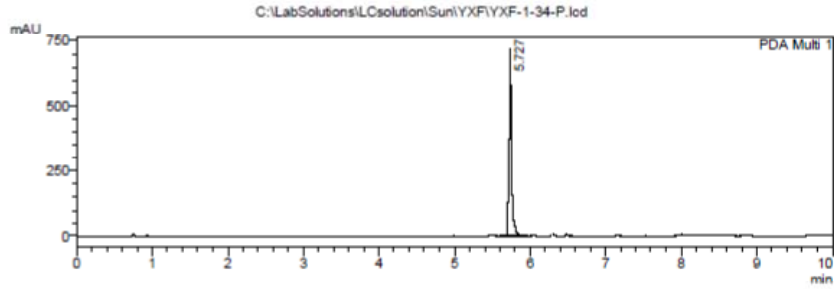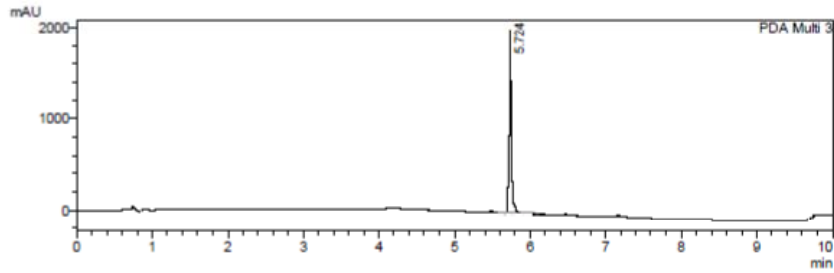

- 1 PDA Multi 1/254nm 4nm
- 2 PDA Multi 3/220nm 4nm

PeakTable

PDA Ch1 254nm 4nm

| Peak# | Ret. Time | Area    | Height  | Area %  | Height % |
|-------|-----------|---------|---------|---------|----------|
| 1     | 5.727     | 1744930 | 701.796 | 100.000 | 100.000  |
| Total |           | 1744930 | 701.796 | 100.000 | 100.000  |

PeakTable

PDA Ch3 220nm 4nm

| Peak# | Ret. Time | Area    | Height  | Area %  | Height % |
|-------|-----------|---------|---------|---------|----------|
| 1     | 5.724     | 4329639 | 1985647 | 100.000 | 100.000  |
| Total |           | 4329639 | 1985647 | 100.000 | 100.000  |

<sup>1</sup>H NMR, <sup>13</sup>C NMR and HPLC spectra of compound 10aq

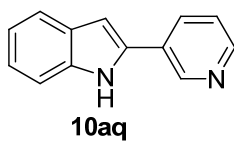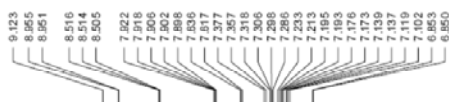

YXF-1-35-P

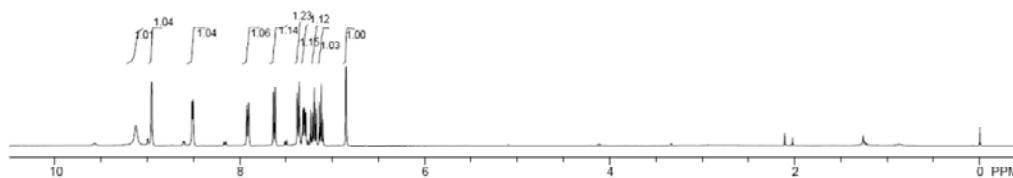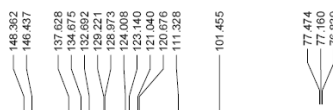

YXF-1-35-P-C13

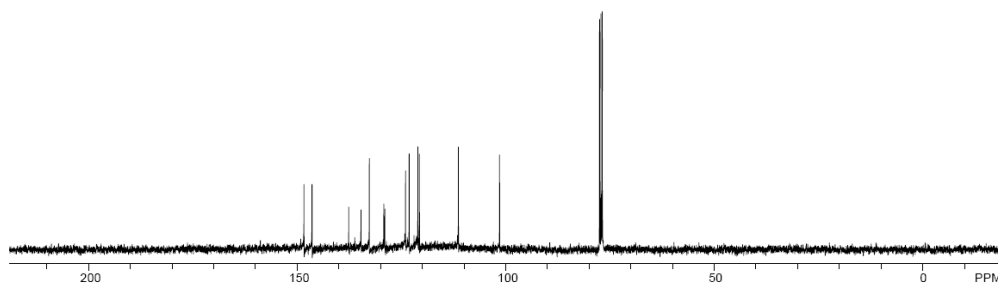

==== Shimadzu LCsolution Analysis Report ====

C:\LabSolutions\LCsolution\Sun\YXF\YXF-1-35-RE.lcd  
 Sample Name : YXF-1-35-RE  
 Tray# : 1  
 Vial # : 31  
 Injection Volume : 10 uL  
 Data File Name : YXF-1-35-RE.lcd  
 Method File Name : SDQ gradient.lcm  
 Batch File Name :  
 Data Acquired : 11/4/2011 8:58:55 AM

<Chromatogram>

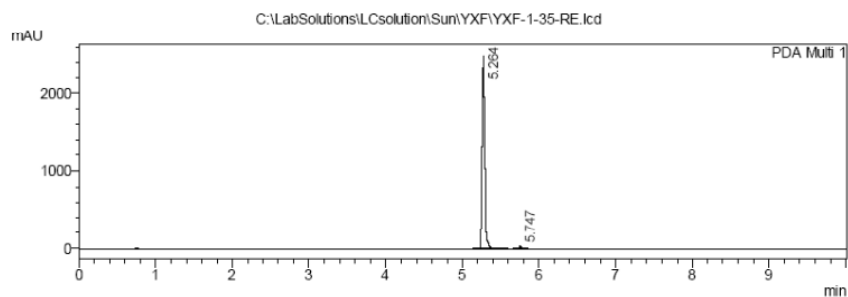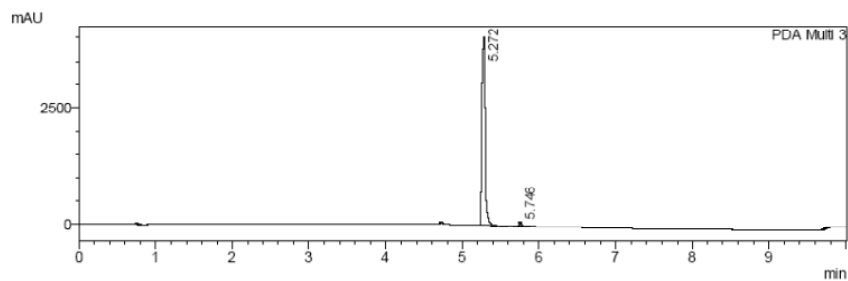

- 1 PDA Multi 1/254nm 4nm
- 2 PDA Multi 3/220nm 4nm

PeakTable

PDA Ch1 254nm 4nm

| Peak#        | Ret. Time | Area           | Height         | Area %         | Height %       |
|--------------|-----------|----------------|----------------|----------------|----------------|
| 1            | 5.264     | 5223591        | 2336958        | 98.643         | 98.716         |
| 2            | 5.747     | 71854          | 30402          | 1.357          | 1.284          |
| <b>Total</b> |           | <b>5295445</b> | <b>2367360</b> | <b>100.000</b> | <b>100.000</b> |

PeakTable

PDA Ch3 220nm 4nm

| Peak#        | Ret. Time | Area            | Height         | Area %         | Height %       |
|--------------|-----------|-----------------|----------------|----------------|----------------|
| 1            | 5.272     | 11134909        | 4030522        | 98.175         | 97.866         |
| 2            | 5.746     | 206951          | 87877          | 1.825          | 2.134          |
| <b>Total</b> |           | <b>11341861</b> | <b>4118399</b> | <b>100.000</b> | <b>100.000</b> |

C:\LabSolutions\LCsolution\Sun\YXF\YXF-1-35-RE.lcd

<sup>1</sup>H NMR, <sup>13</sup>C NMR and HPLC spectra of compound 10as

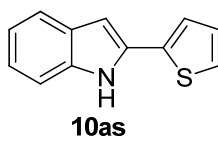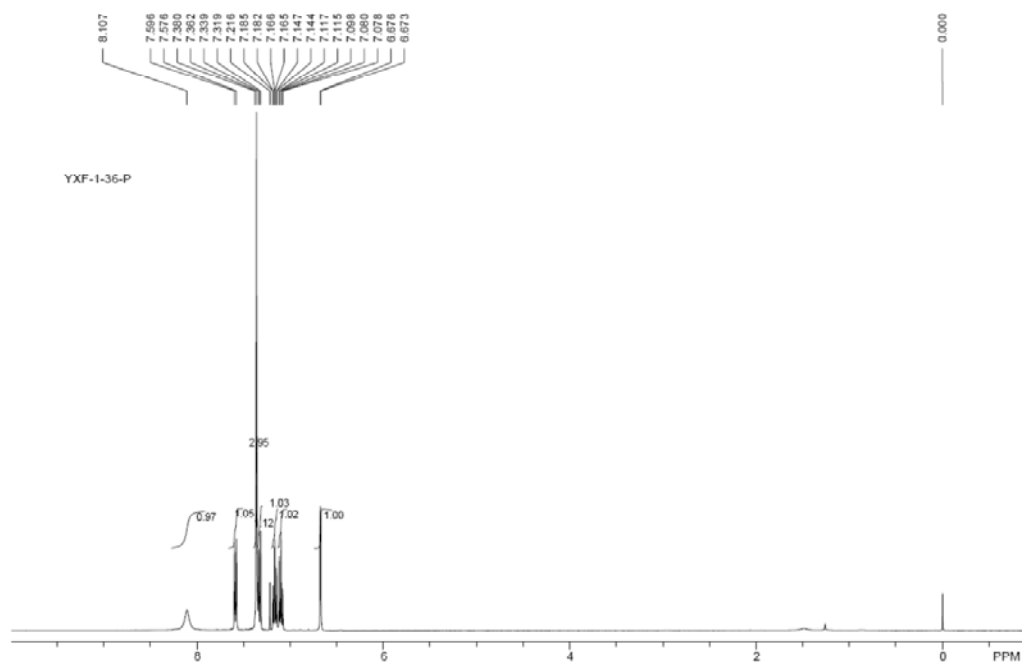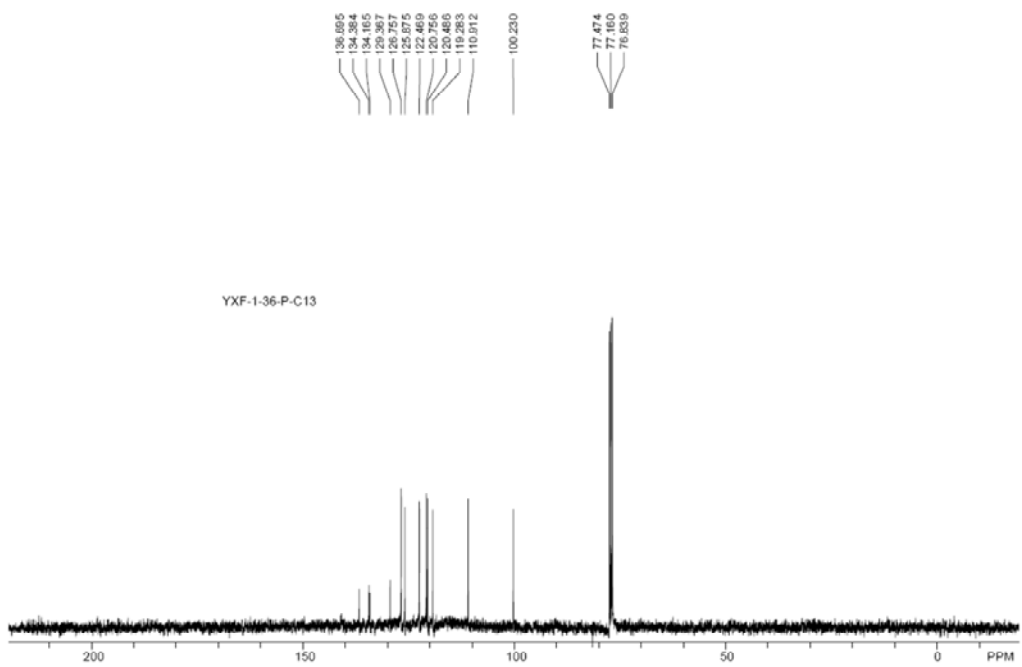

==== Shimadzu LCsolution Analysis Report ====

C:\LabSolutions\LCsolution\Sun\YXF\YXF-1-36-P.lcd  
 Sample Name : YXF-1-36-P  
 Tray# : 1  
 Vial # : 31  
 Injection Volume : 5 uL  
 Data File Name : YXF-1-36-P.lcd  
 Method File Name : SDQ gradient.lom  
 Batch File Name :  
 Data Acquired : 11/2/2011 9:32:59 AM

<Chromatogram>

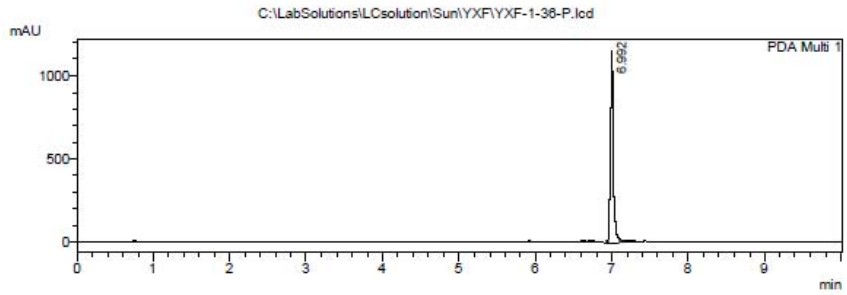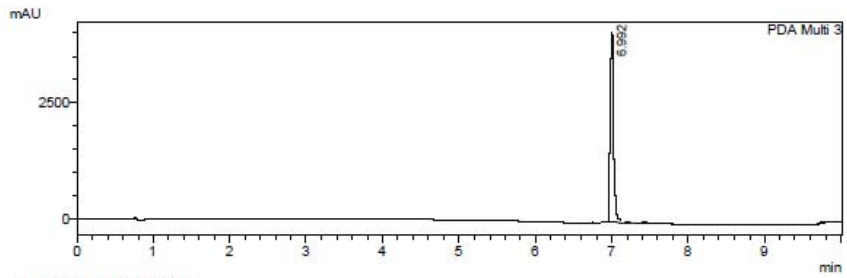

- 1 PDA Multi 1/254nm 4nm
- 2 PDA Multi 3/220nm 4nm

PeakTable

| PDA Ch1 254nm 4nm |           |         |         |         |          |
|-------------------|-----------|---------|---------|---------|----------|
| Peak#             | Ret. Time | Area    | Height  | Area %  | Height % |
| 1                 | 6.992     | 2960666 | 1109863 | 100.000 | 100.000  |
| Total             |           | 2960666 | 1109863 | 100.000 | 100.000  |

PeakTable

| PDA Ch3 220nm 4nm |           |          |         |         |          |
|-------------------|-----------|----------|---------|---------|----------|
| Peak#             | Ret. Time | Area     | Height  | Area %  | Height % |
| 1                 | 6.992     | 13002716 | 4075365 | 100.000 | 100.000  |
| Total             |           | 13002716 | 4075365 | 100.000 | 100.000  |



<sup>1</sup>H NMR, <sup>13</sup>C NMR and HPLC spectra of compound 10at

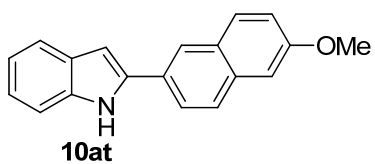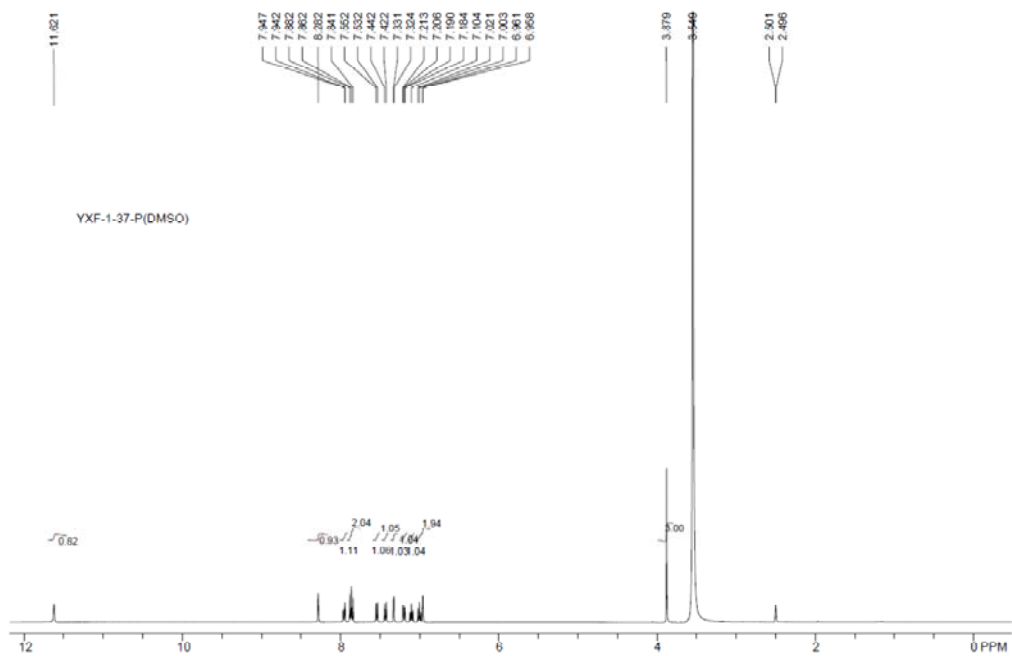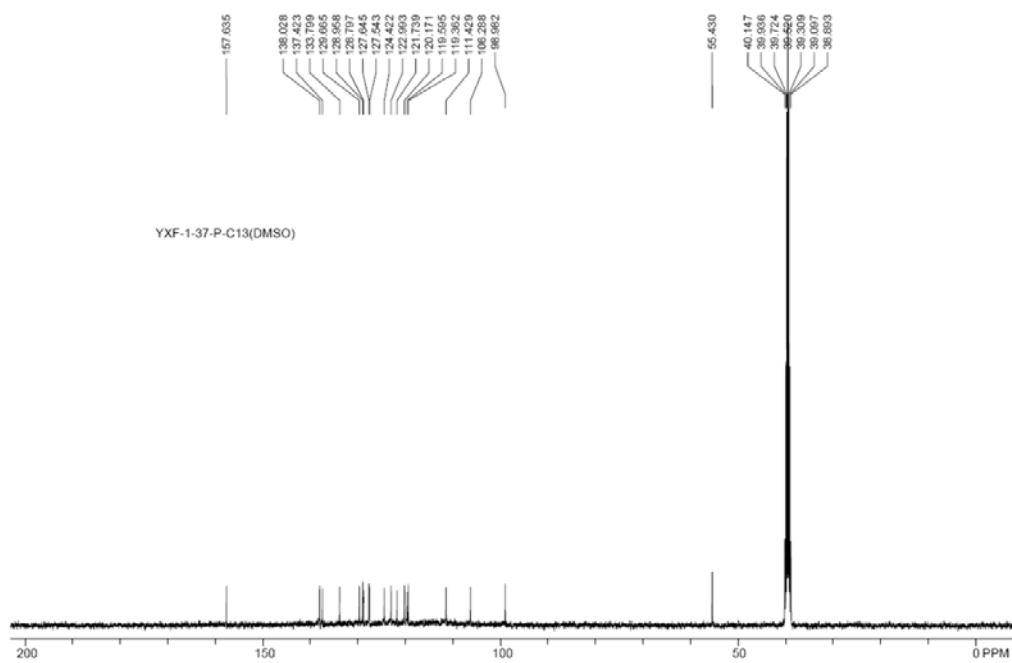

==== Shimadzu LCsolution Analysis Report ====

C:\LabSolutions\LCsolution\Sun\YXF\YXF-1-37-P.lcd  
 Sample Name : YXF-1-37-P  
 Tray# : 1  
 Vial# : 31  
 Injection Volume : 5 uL  
 Data File Name : YXF-1-37-P.lcd  
 Method File Name : SDQ gradient.lcm  
 Batch File Name :  
 Data Acquired : 11/3/2011 3:08:17 PM

<Chromatogram>

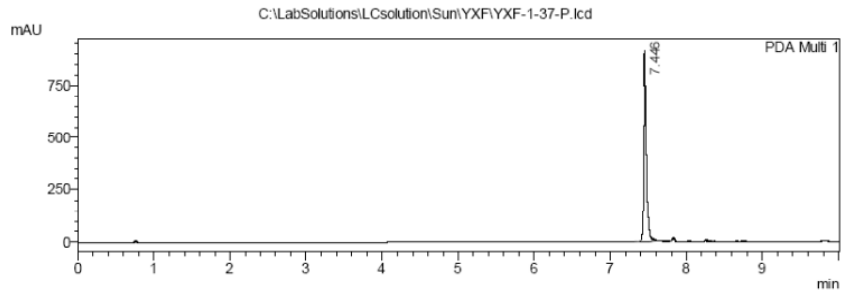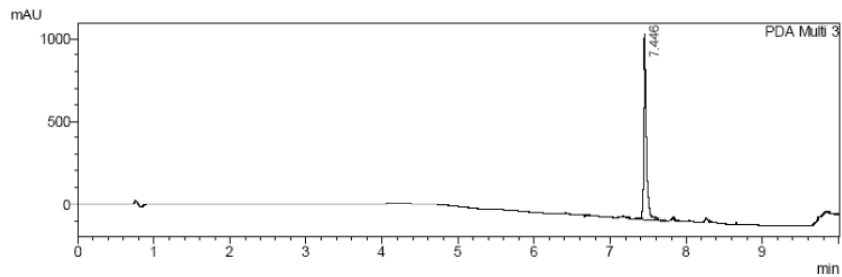

- 1 PDA Multi 1/254nm 4nm
- 2 PDA Multi 3/220nm 4nm

PeakTable

PDA Ch1 254nm 4nm

| Peak# | Ret. Time | Area    | Height | Area %  | Height % |
|-------|-----------|---------|--------|---------|----------|
| 1     | 7.446     | 2313370 | 899173 | 100.000 | 100.000  |
| Total |           | 2313370 | 899173 | 100.000 | 100.000  |

PeakTable

PDA Ch3 220nm 4nm

| Peak# | Ret. Time | Area    | Height  | Area %  | Height % |
|-------|-----------|---------|---------|---------|----------|
| 1     | 7.446     | 2795756 | 1113262 | 100.000 | 100.000  |
| Total |           | 2795756 | 1113262 | 100.000 | 100.000  |

<sup>1</sup>H NMR, <sup>13</sup>C NMR and HPLC spectra of compound 10ba

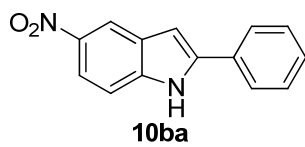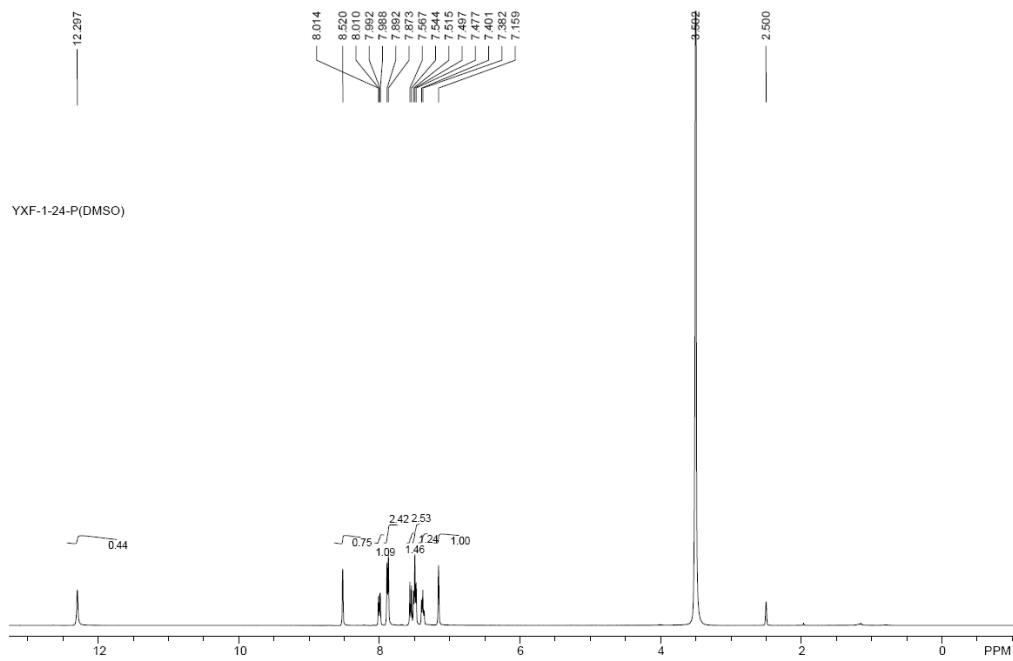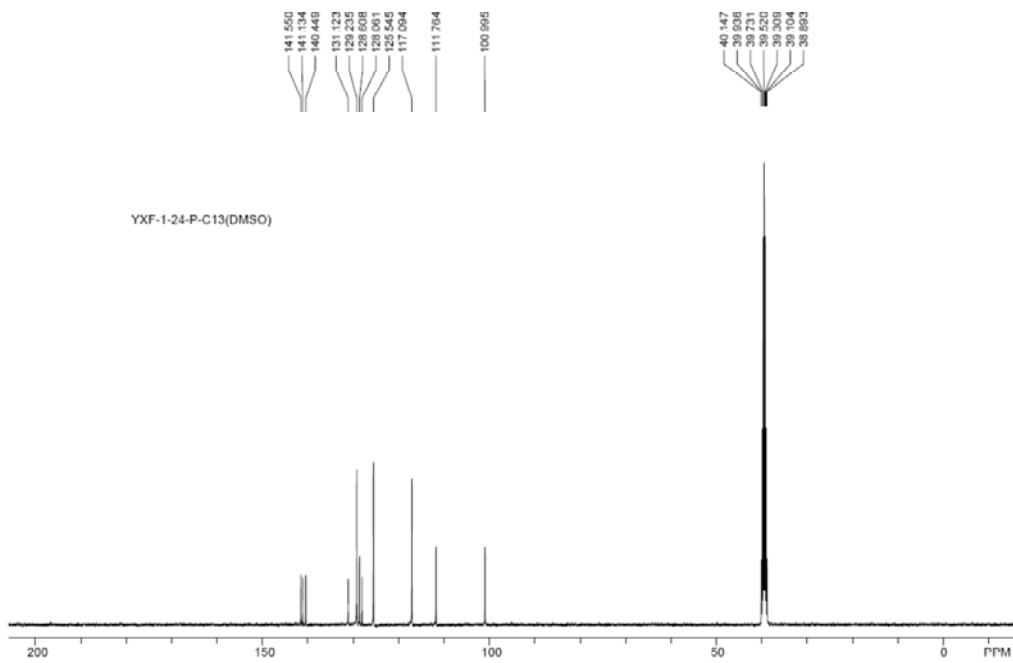

==== Shimadzu LCsolution Analysis Report ====

C:\LabSolutions\LCsolution\Sun\YXF\YXF-1-24-P.lcd  
 Sample Name : YXF-1-24-P  
 Tray# : 1  
 Vial # : 2  
 Injection Volume : 5 uL  
 Data File Name : YXF-1-24-P.lcd  
 Method File Name : SDQ gradient.lcm  
 Batch File Name : Batch 1.lcb  
 Data Acquired : 10/13/2011 10:30:57 AM

<Chromatogram>

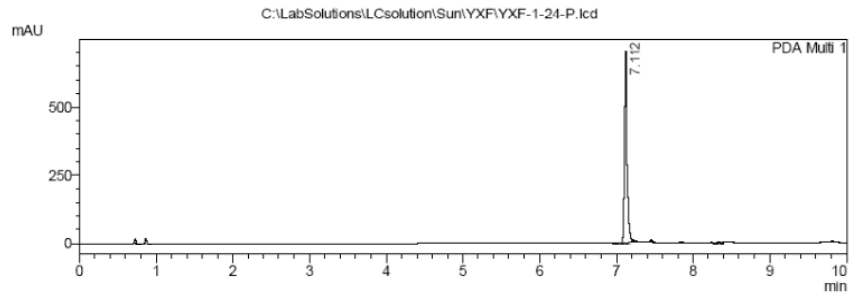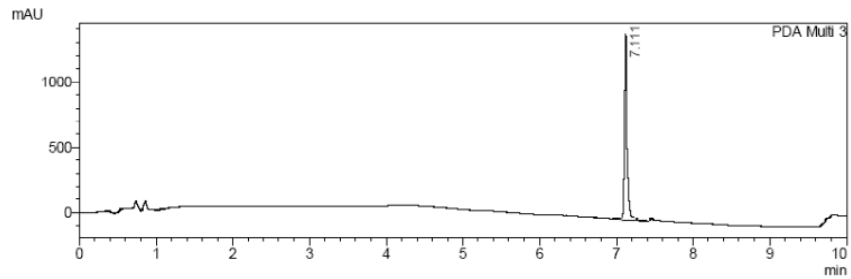

- 1 PDA Multi 1/254nm 4nm
- 2 PDA Multi 3/220nm 4nm

PeakTable

| PDA Ch1 254nm 4nm |           |         |        |         |          |  |
|-------------------|-----------|---------|--------|---------|----------|--|
| Peak#             | Ret. Time | Area    | Height | Area %  | Height % |  |
| 1                 | 7.112     | 1788630 | 677180 | 100.000 | 100.000  |  |
| Total             |           | 1788630 | 677180 | 100.000 | 100.000  |  |

PeakTable

| PDA Ch3 220nm 4nm |           |         |         |         |          |  |
|-------------------|-----------|---------|---------|---------|----------|--|
| Peak#             | Ret. Time | Area    | Height  | Area %  | Height % |  |
| 1                 | 7.111     | 3499548 | 1412401 | 100.000 | 100.000  |  |
| Total             |           | 3499548 | 1412401 | 100.000 | 100.000  |  |

C:\LabSolutions\LCsolution\Sun\YXF\YXF-1-24-P.lcd

<sup>1</sup>H NMR, <sup>13</sup>C NMR and HPLC spectra of compound 10bb

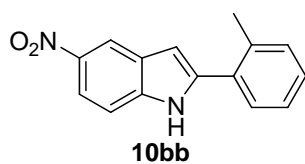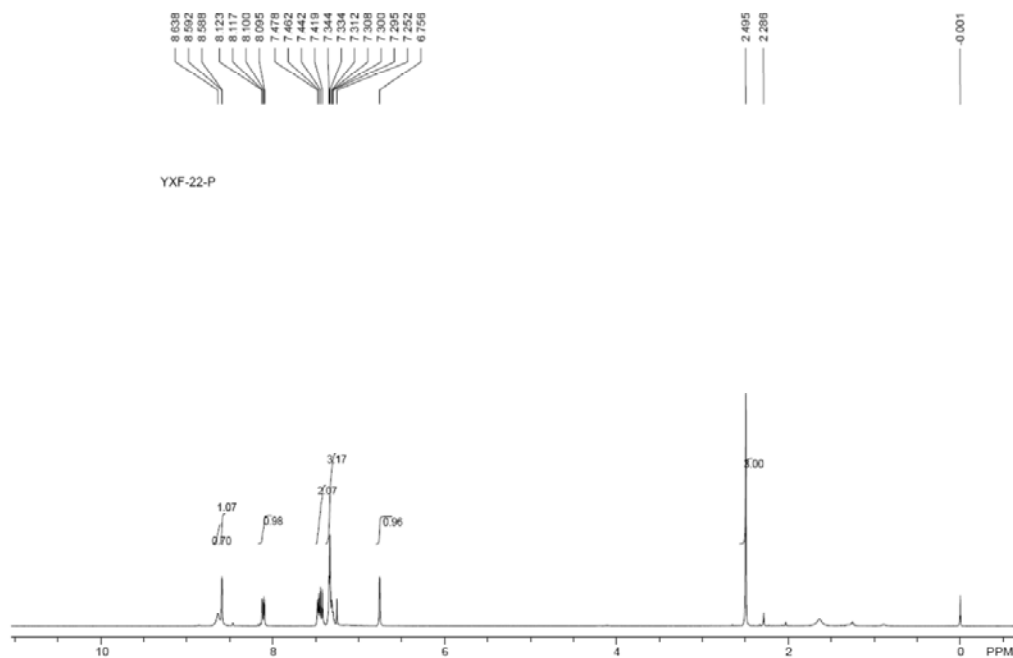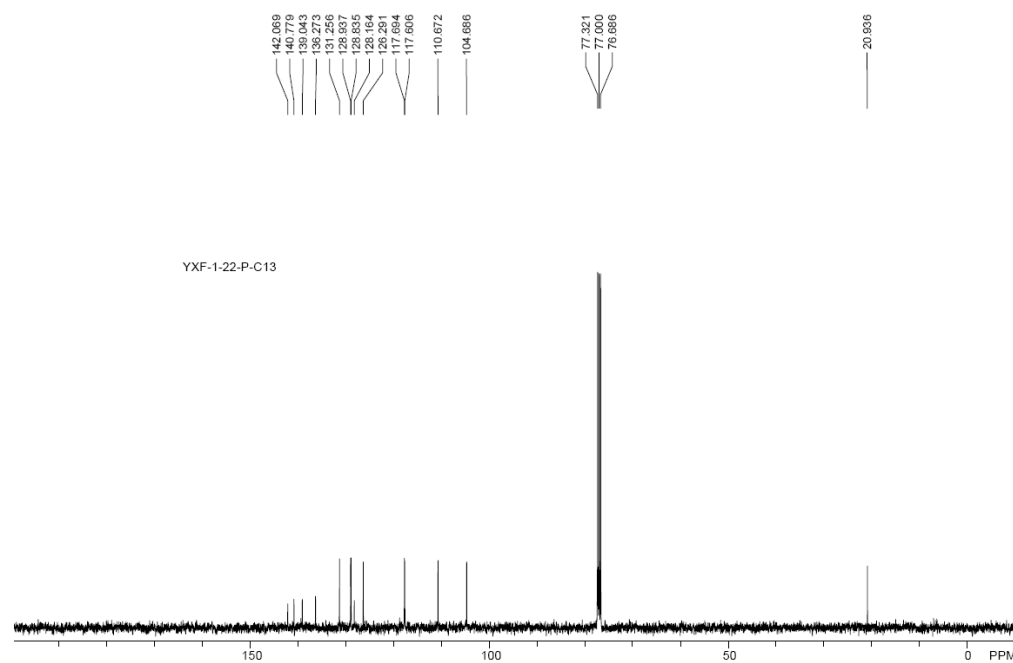

==== Shimadzu LCsolution Analysis Report ====

C:\LabSolutions\LCsolution\Sun\YXF\YXF-1-22-P.lcd  
 Sample Name : YXF-1-22-P  
 Tray# : 1  
 Vial # : 4  
 Injection Volume : 10 uL  
 Data File Name : YXF-1-22-P.lcd  
 Method File Name : SDQ.gradient.lcm  
 Batch File Name : Batch 1.lcb  
 Data Acquired : 10/7/2011 9:41:11 AM

<Chromatogram>

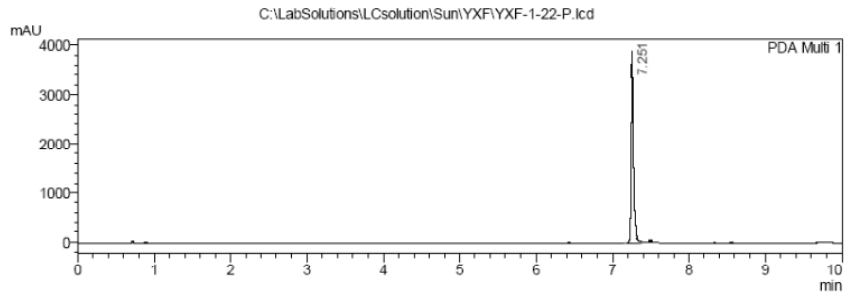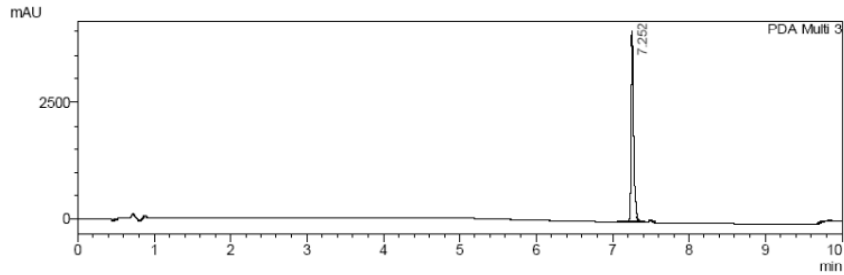

- 1 PDA Multi 1/254nm 4nm
- 2 PDA Multi 3/220nm 4nm

PeakTable

| Peak#        | Ret. Time | Area           | Height         | Area %         | Height %       |
|--------------|-----------|----------------|----------------|----------------|----------------|
| 1            | 7.251     | 9249252        | 3859024        | 100.000        | 100.000        |
| <b>Total</b> |           | <b>9249252</b> | <b>3859024</b> | <b>100.000</b> | <b>100.000</b> |

PeakTable

| Peak#        | Ret. Time | Area            | Height         | Area %         | Height %       |
|--------------|-----------|-----------------|----------------|----------------|----------------|
| 1            | 7.252     | 10459178        | 4044788        | 100.000        | 100.000        |
| <b>Total</b> |           | <b>10459178</b> | <b>4044788</b> | <b>100.000</b> | <b>100.000</b> |

<sup>1</sup>H NMR, <sup>13</sup>C NMR and HPLC spectra of compound 10ca

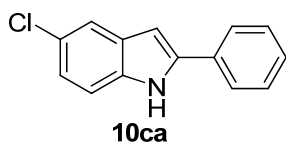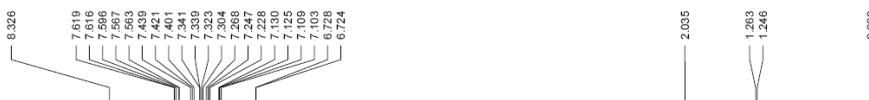

YXF-1-25-P

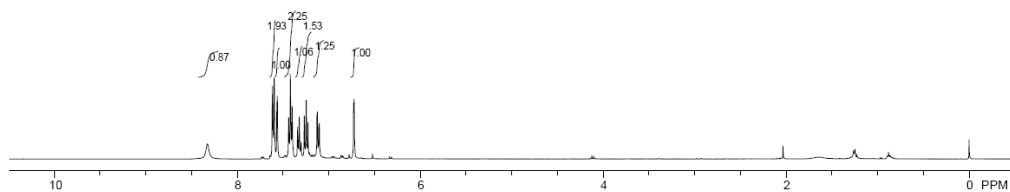

YXF-1-25-P-C13

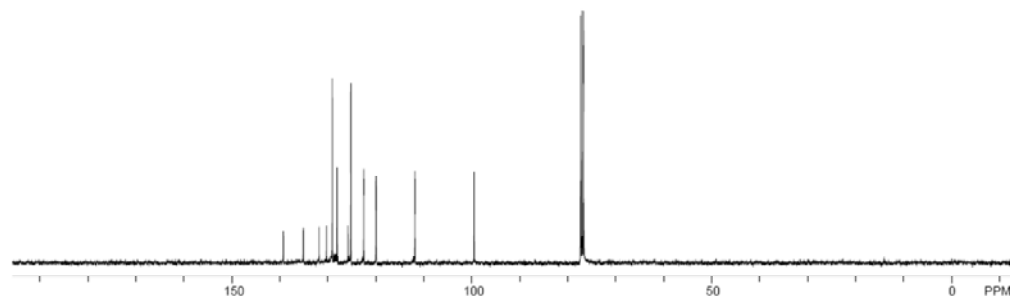

==== Shimadzu LCsolution Analysis Report ====

C:\LabSolutions\LCsolution\Sun\YXF\YXF-1-25-P.lcd  
 Sample Name : YXF-1-25-P  
 Tray# : 1  
 Vial # : 46  
 Injection Volume : 5 uL  
 Data File Name : YXF-1-25-P.lcd  
 Method File Name : SDQ gradient.lcm  
 Batch File Name :  
 Data Acquired : 10/14/2011 1:00:34 PM

<Chromatogram>

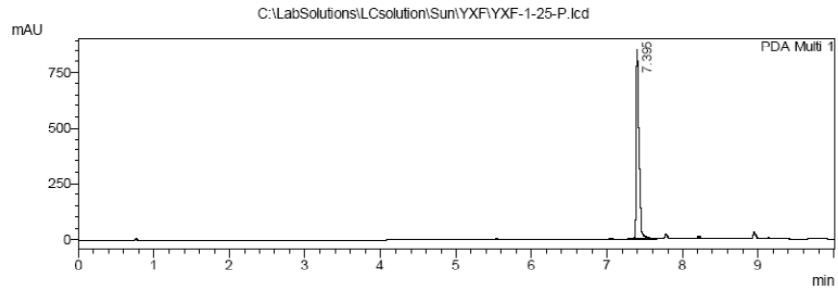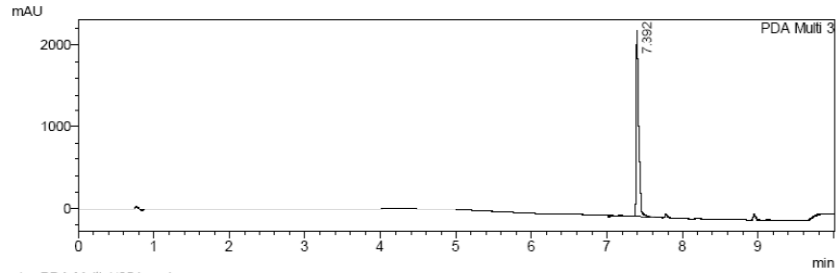

- 1 PDA Multi 1/254nm 4nm
- 2 PDA Multi 3/220nm 4nm

PeakTable

PDA Ch1 254nm 4nm

| Peak# | Ret. Time | Area    | Height | Area %  | Height % |
|-------|-----------|---------|--------|---------|----------|
| 1     | 7.395     | 2156402 | 839166 | 100.000 | 100.000  |
| Total |           | 2156402 | 839166 | 100.000 | 100.000  |

PeakTable

PDA Ch3 220nm 4nm

| Peak# | Ret. Time | Area    | Height  | Area %  | Height % |
|-------|-----------|---------|---------|---------|----------|
| 1     | 7.392     | 5060669 | 2272048 | 100.000 | 100.000  |
| Total |           | 5060669 | 2272048 | 100.000 | 100.000  |



<sup>1</sup>H NMR, <sup>13</sup>C NMR and HPLC spectra of compound 10da

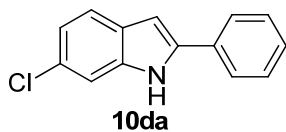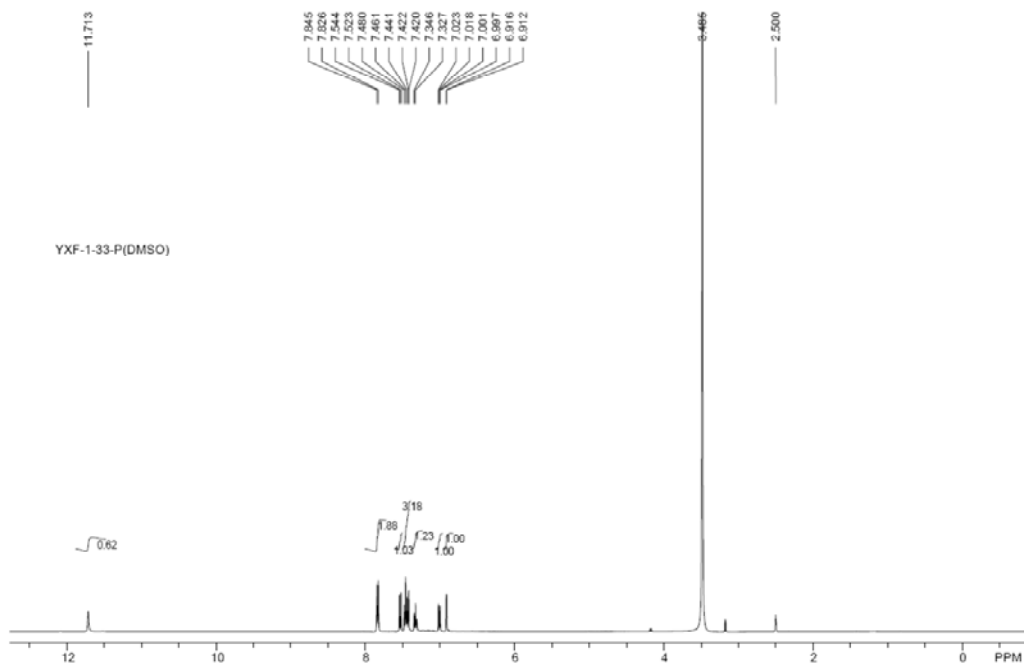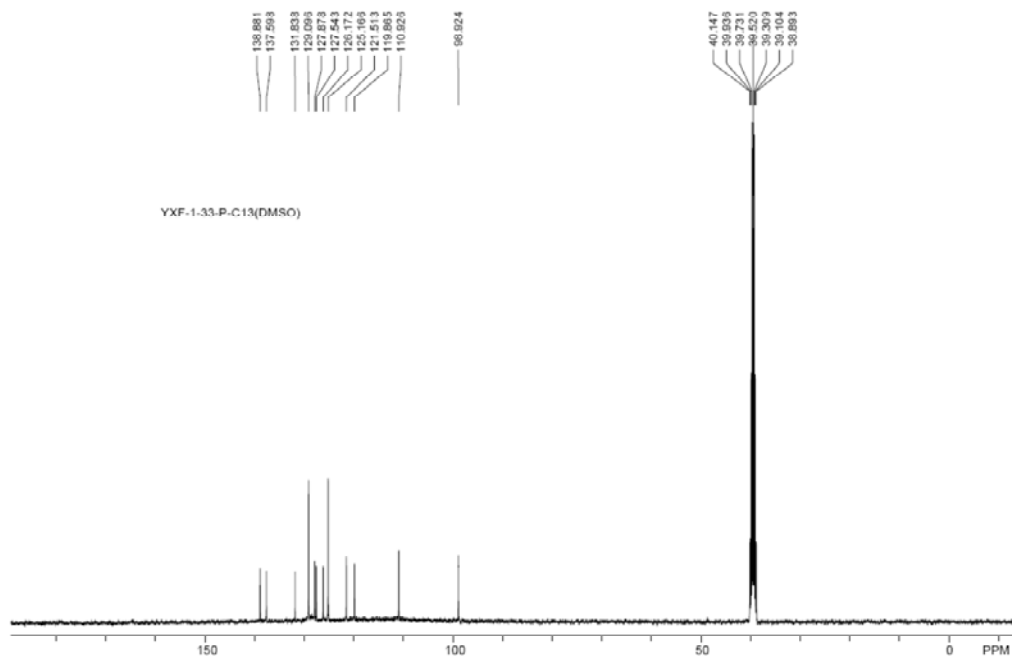

### ==== Shimadzu LCsolution Analysis Report ====

C:\LabSolutions\LCsolution\Sun\YXF\YXF-1-33-Pure.lcd  
 Sample Name : YXF-1-33-Pure  
 Tray# : 1  
 Vial # : 31  
 Injection Volume : 3 uL  
 Data File Name : YXF-1-33-Pure.lcd  
 Method File Name : SDQ gradient.lcm  
 Batch File Name :  
 Data Acquired : 2/29/2012 11:54:23 AM

#### <Chromatogram>

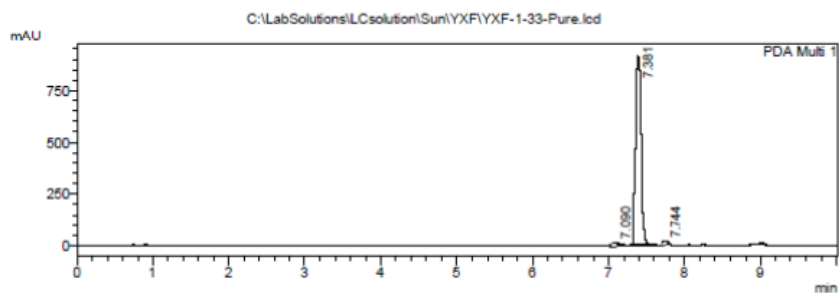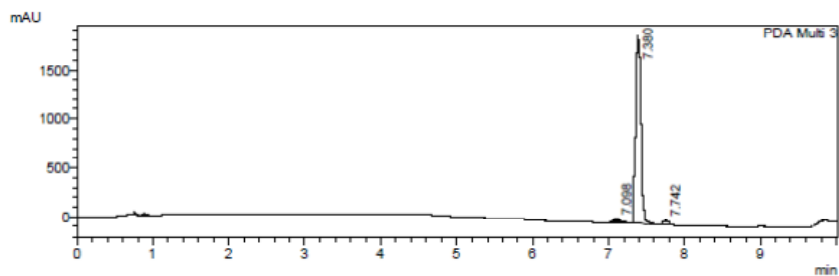

- 1 PDA Multi 1/254nm 4nm  
 2 PDA Multi 3/220nm 4nm

PeakTable

PDA Ch1 254nm 4nm

| Peak# | Ret. Time | Area    | Height | Area %  | Height % |
|-------|-----------|---------|--------|---------|----------|
| 1     | 7.090     | 71624   | 14268  | 1.466   | 1.506    |
| 2     | 7.381     | 4731715 | 916578 | 96.845  | 96.728   |
| 3     | 7.744     | 82514   | 16739  | 1.689   | 1.766    |
| Total |           | 4885853 | 947585 | 100.000 | 100.000  |

PeakTable

PDA Ch3 220nm 4nm

| Peak# | Ret. Time | Area    | Height  | Area %  | Height % |
|-------|-----------|---------|---------|---------|----------|
| 1     | 7.098     | 177928  | 35004   | 1.831   | 1.776    |
| 2     | 7.380     | 9366588 | 1903411 | 96.406  | 96.554   |
| 3     | 7.742     | 171270  | 32936   | 1.763   | 1.671    |
| Total |           | 9715786 | 1971351 | 100.000 | 100.000  |

C:\LabSolutions\LCsolution\Sun\YXF\YXF-1-33-Pure.lcd

<sup>1</sup>H NMR, <sup>13</sup>C NMR and HPLC spectra of compound 10ea

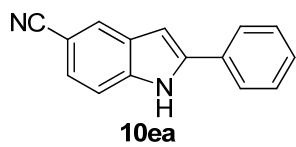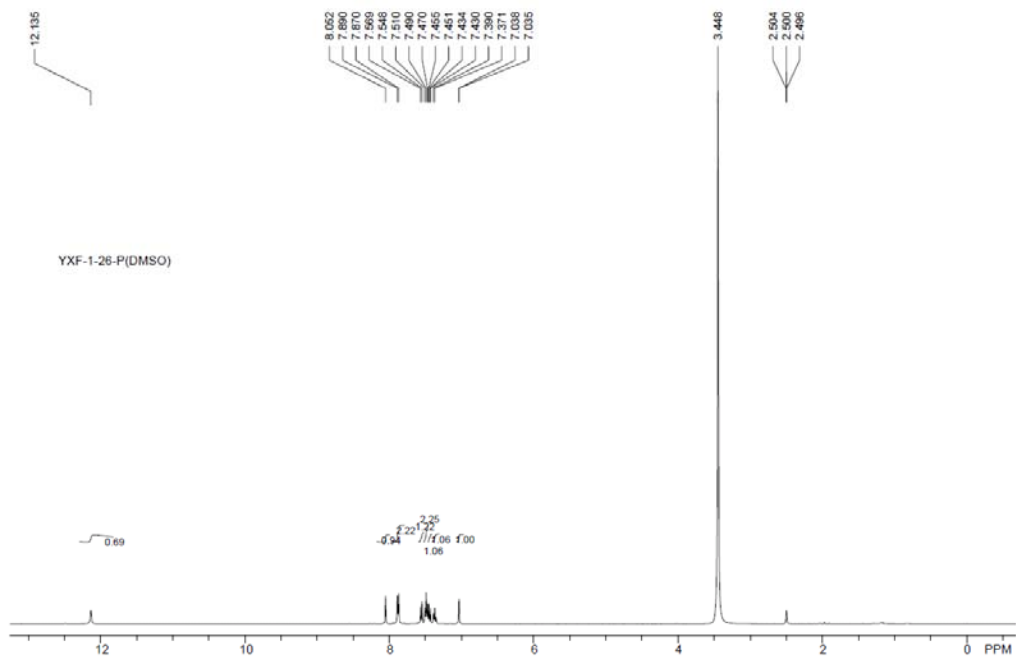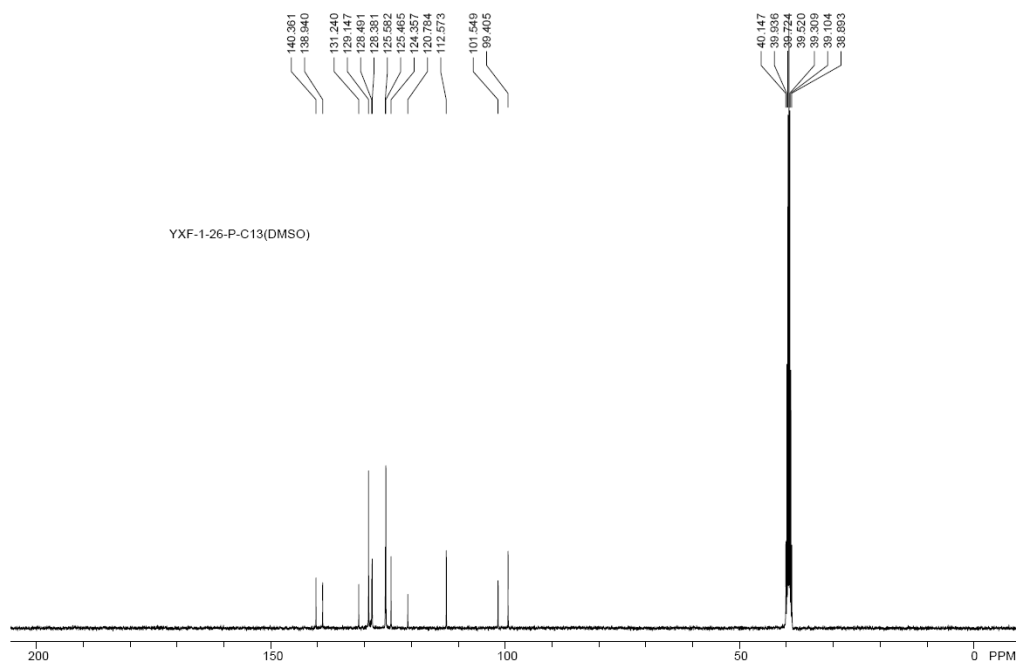

==== Shimadzu LCsolution Analysis Report ====

C:\LabSolutions\LCsolution\Sun\YXF\YXF-1-26-P.lcd  
 Sample Name : YXF-1-26-P  
 Tray# : 1  
 Vial # : 16  
 Injection Volume : 5 uL  
 Data File Name : YXF-1-26-P.lcd  
 Method File Name : SDQ gradient.lcm  
 Batch File Name :  
 Data Acquired : 10/17/2011 11:28:04 AM

<Chromatogram>

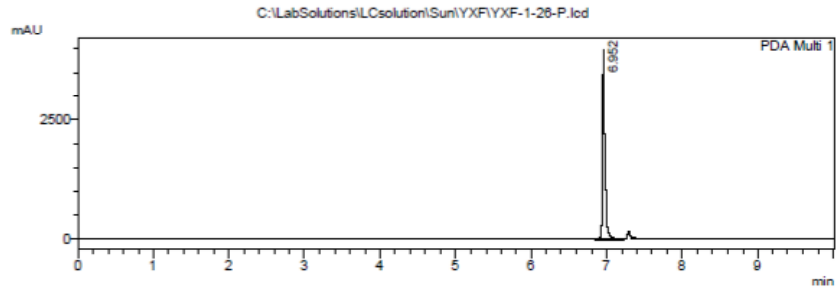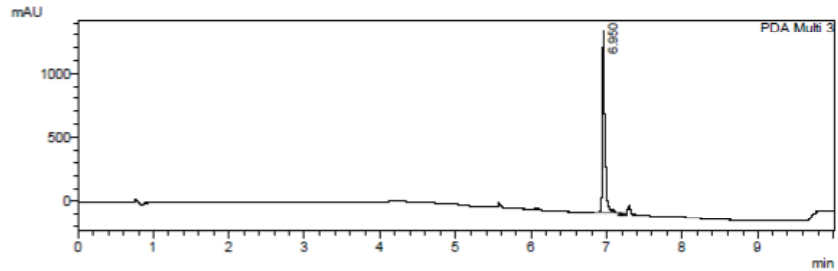

- 1 PDA Multi 1/254nm 4nm
- 2 PDA Multi 3/220nm 4nm

PeakTable

PDA Ch1 254nm 4nm

| Peak# | Ret. Time | Area    | Height  | Area %  | Height % |
|-------|-----------|---------|---------|---------|----------|
| 1     | 6.952     | 9777743 | 3791031 | 100.000 | 100.000  |
| Total |           | 9777743 | 3791031 | 100.000 | 100.000  |

PeakTable

PDA Ch3 220nm 4nm

| Peak# | Ret. Time | Area    | Height  | Area %  | Height % |
|-------|-----------|---------|---------|---------|----------|
| 1     | 6.950     | 3588053 | 1425354 | 100.000 | 100.000  |
| Total |           | 3588053 | 1425354 | 100.000 | 100.000  |

<sup>1</sup>H NMR, <sup>13</sup>C NMR and HPLC spectra of compound 10fa

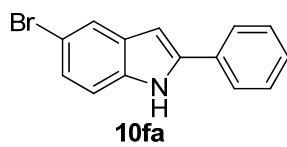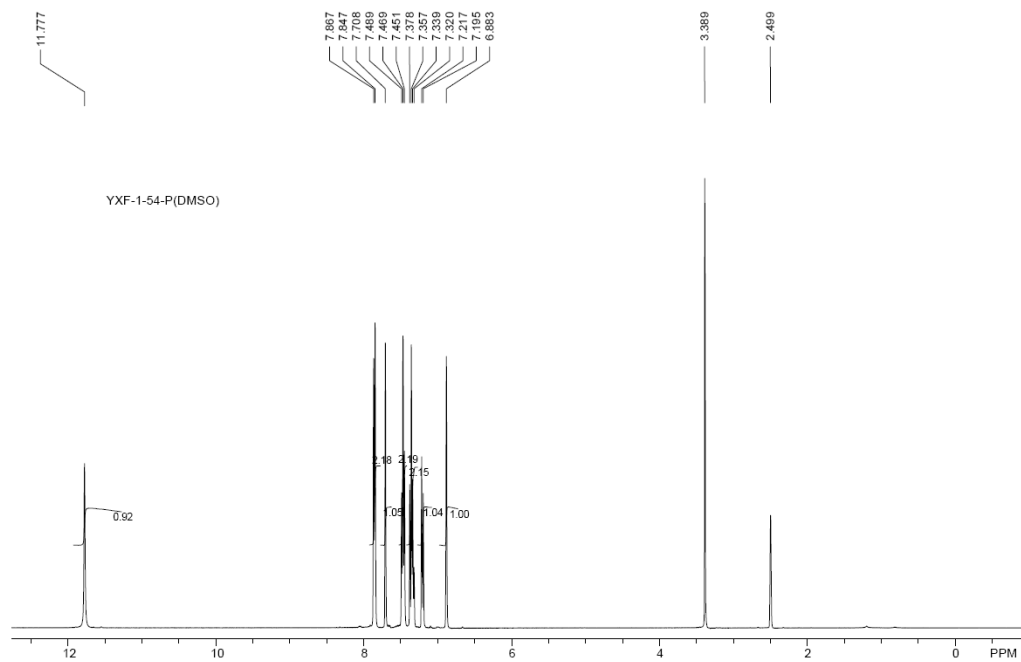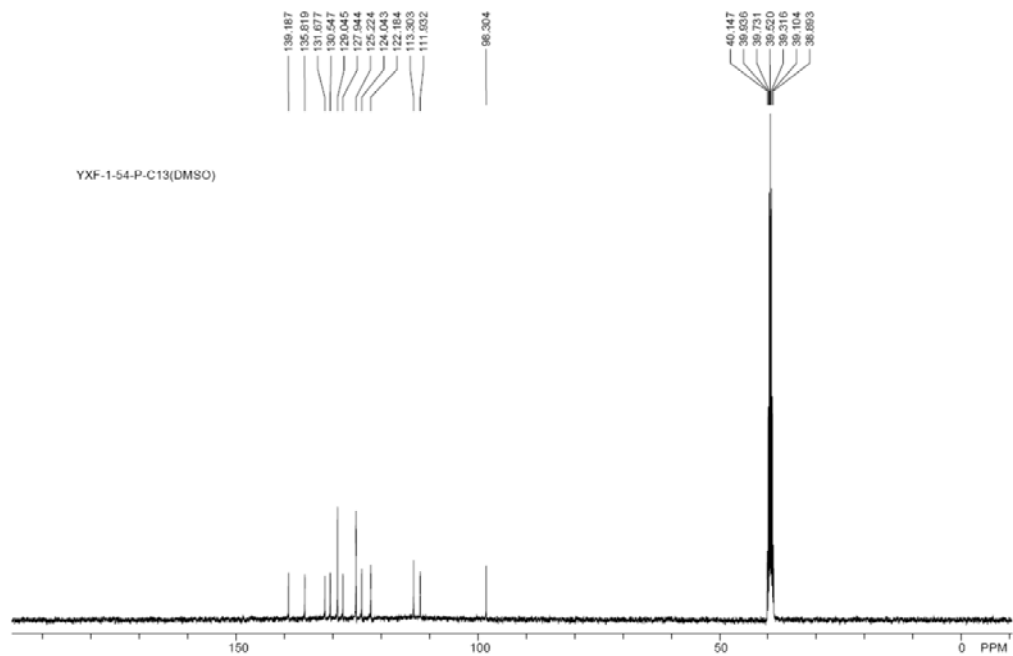

==== Shimadzu LCsolution Analysis Report ====

C:\LabSolutions\LCsolution\Sun\YXF\YXF-1-54-P.lcd  
 Sample Name : YXF-1-54-P  
 Tray# : 1  
 Vail # : 31  
 Injection Volume : 10 uL  
 Data File Name : YXF-1-54-P.lcd  
 Method File Name : SDQ gradient.lcm  
 Batch File Name :  
 Data Acquired : 11/22/2011 3:05:28 PM

<Chromatogram>

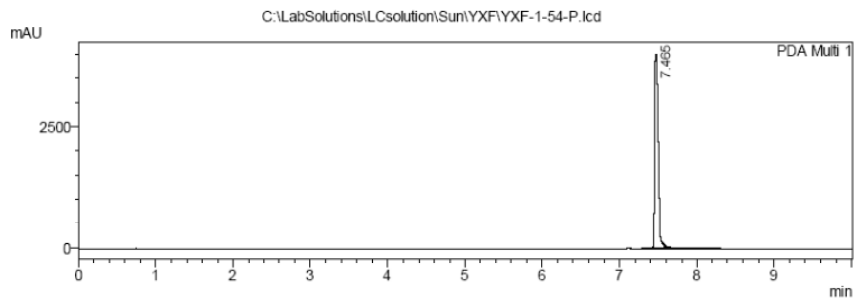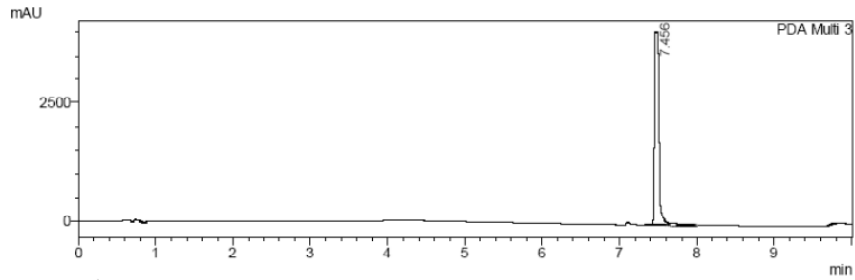

- 1 PDA Multi 1/254nm 4nm
- 2 PDA Multi 3/220nm 4nm

PeakTable

PDA Ch1 254nm 4nm

| Peak#        | Ret. Time | Area     | Height  | Area %  | Height % |
|--------------|-----------|----------|---------|---------|----------|
| 1            | 7.465     | 13537938 | 3998146 | 100.000 | 100.000  |
| <b>Total</b> |           | 13537938 | 3998146 | 100.000 | 100.000  |

PeakTable

PDA Ch3 220nm 4nm

| Peak#        | Ret. Time | Area     | Height  | Area %  | Height % |
|--------------|-----------|----------|---------|---------|----------|
| 1            | 7.456     | 17386343 | 4085725 | 100.000 | 100.000  |
| <b>Total</b> |           | 17386343 | 4085725 | 100.000 | 100.000  |

<sup>1</sup>H NMR, <sup>13</sup>C NMR and HPLC spectra of compound 10ga

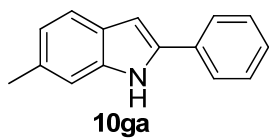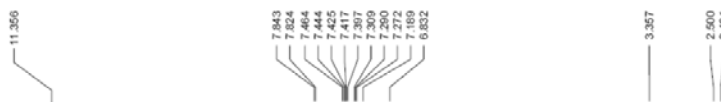

YXF-1-62-P(DMSO)

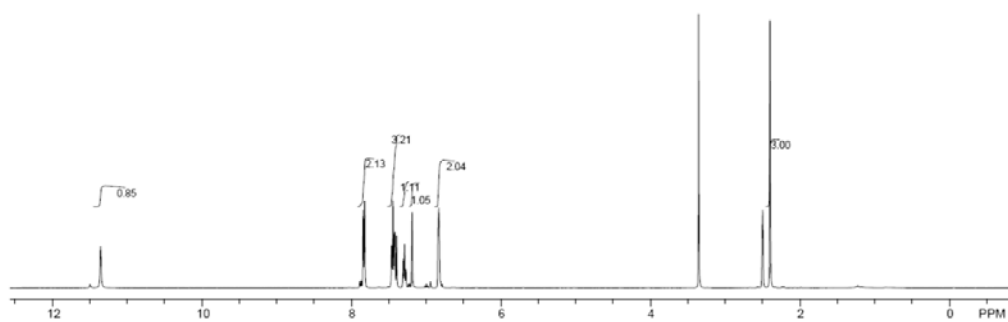

YXF-1-62-P-C13

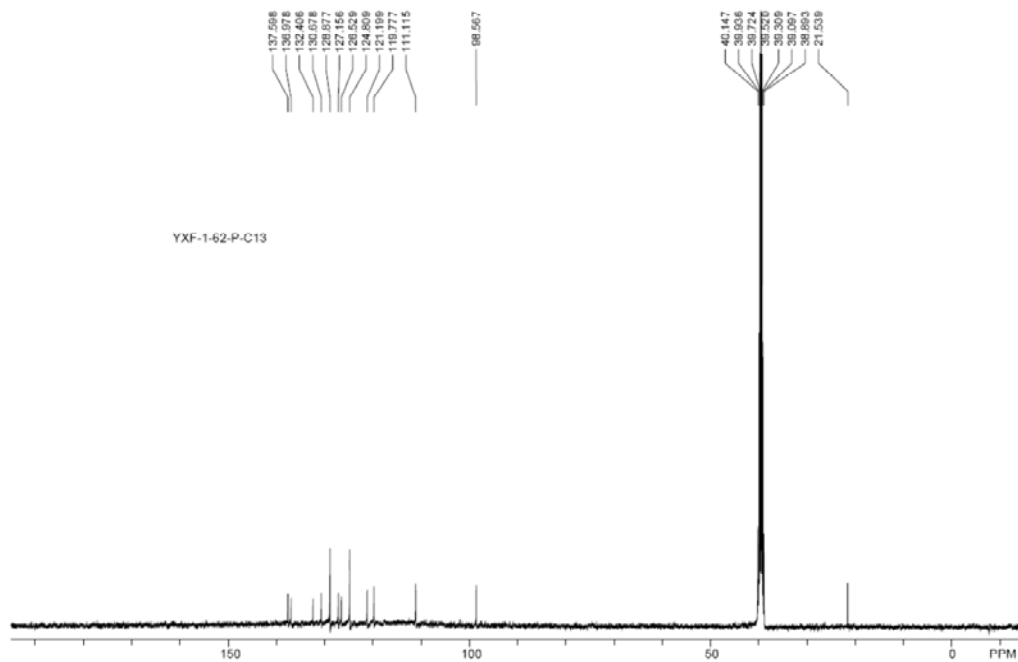

==== Shimadzu LCsolution Analysis Report ====

C:\LabSolutions\LCsolution\Sun\YXF\YXF-1-62-P.lcd  
 Sample Name : YXF-1-62-P  
 Tray# : 1  
 Vial # : 31  
 Injection Volume : 5 uL  
 Data File Name : YXF-1-62-P.lcd  
 Method File Name : SDQ.gradient.lcm  
 Batch File Name :  
 Data Acquired : 12/3/2011 11:53:08 AM

<Chromatogram>

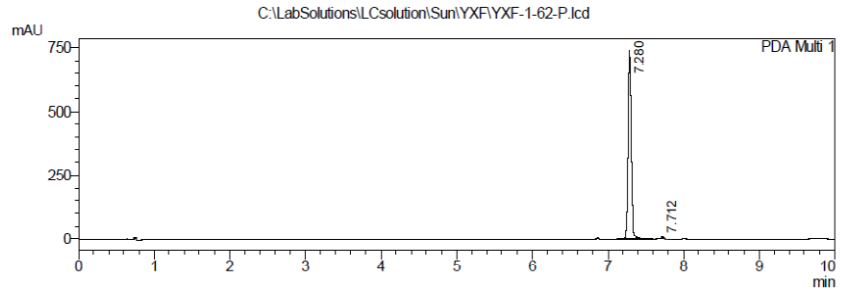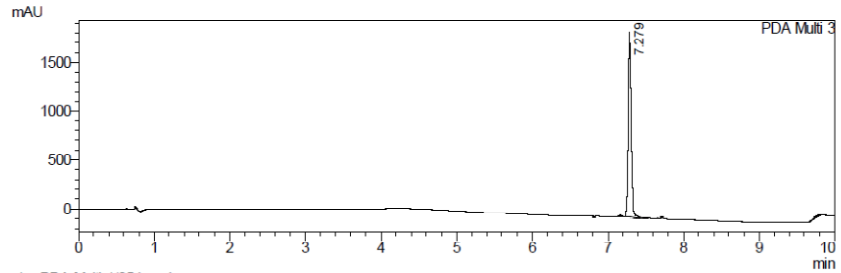

- 1 PDA Multi 1/254nm 4nm
- 2 PDA Multi 3/220nm 4nm

PeakTable

PDA Ch1 254nm 4nm

| Peak# | Ret. Time | Area    | Height | Area %  | Height % |
|-------|-----------|---------|--------|---------|----------|
| 1     | 7.280     | 1998208 | 715790 | 98.850  | 98.465   |
| 2     | 7.712     | 23249   | 11159  | 1.150   | 1.535    |
| Total |           | 2021456 | 726949 | 100.000 | 100.000  |

PeakTable

PDA Ch3 220nm 4nm

| Peak# | Ret. Time | Area    | Height  | Area %  | Height % |
|-------|-----------|---------|---------|---------|----------|
| 1     | 7.279     | 4662707 | 1896352 | 100.000 | 100.000  |
| Total |           | 4662707 | 1896352 | 100.000 | 100.000  |



<sup>1</sup>H NMR, <sup>13</sup>C NMR and HPLC spectra of compound 10ha

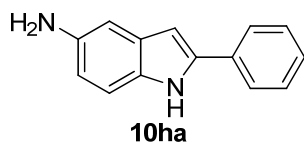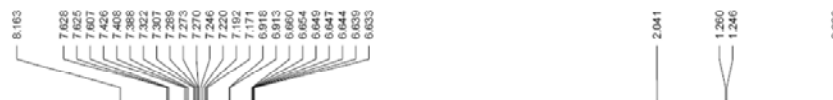

YXF-1-46-P

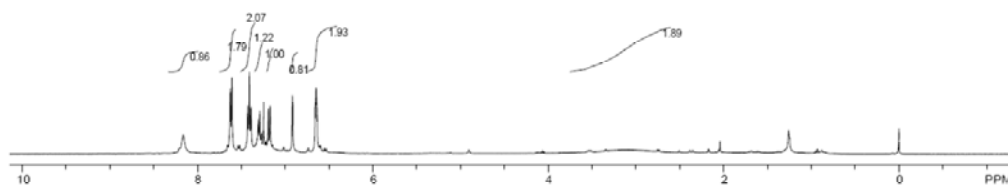

YXF-1-46-P-C13

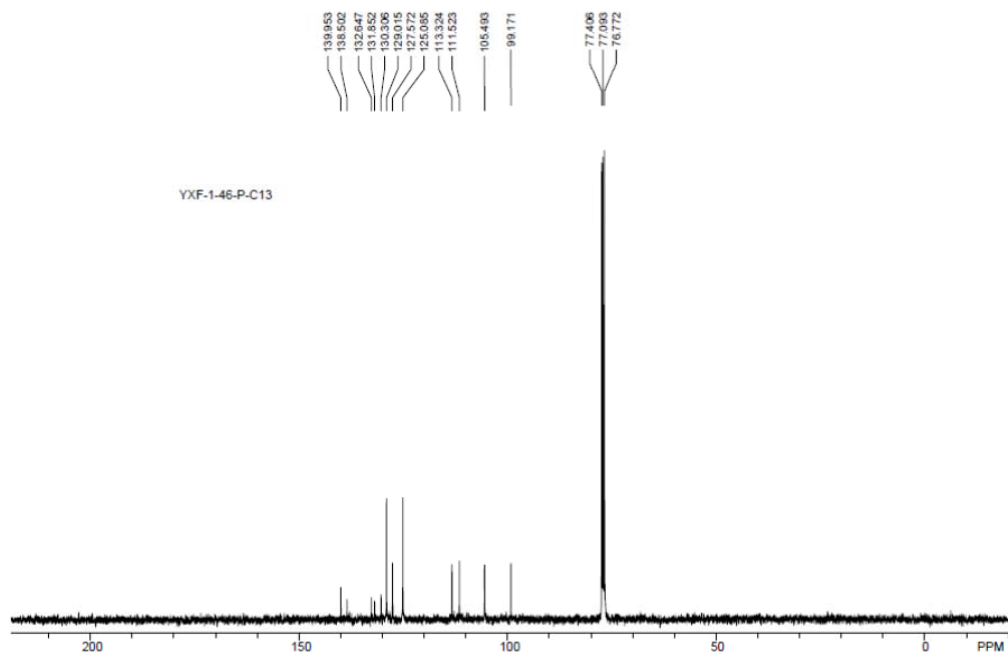

==== Shimadzu LCsolution Analysis Report ====

C:\LabSolutions\LCsolution\Sun\YXF\YXF-1-46-PURE.lcd  
 Sample Name : YXF-1-46-P  
 Tray# : 1  
 Vial # : 32  
 Injection Volume : 10 uL  
 Data File Name : YXF-1-46-PURE.lcd  
 Method File Name : SDQ gradient.lcm  
 Batch File Name : Batch 1.lcb  
 Data Acquired : 2/25/2012 1:45:45 PM

<Chromatogram>

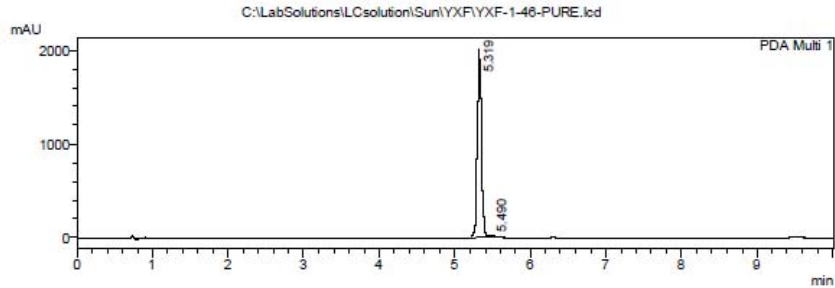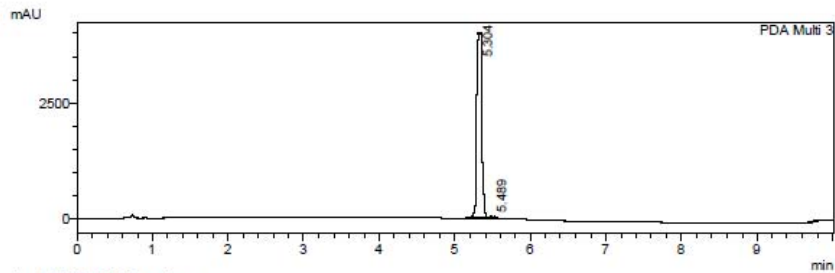

- 1 PDA Multi 1/254nm 4nm
- 2 PDA Multi 3/220nm 4nm

PeakTable

PDA Ch1 254nm 4nm

| Peak# | Ret. Time | Area    | Height  | Area %  | Height % |
|-------|-----------|---------|---------|---------|----------|
| 1     | 5.319     | 8165117 | 1999113 | 99.237  | 98.940   |
| 2     | 5.490     | 62785   | 21421   | 0.763   | 1.060    |
| Total |           | 8227903 | 2020534 | 100.000 | 100.000  |

PeakTable

PDA Ch3 220nm 4nm

| Peak# | Ret. Time | Area     | Height  | Area %  | Height % |
|-------|-----------|----------|---------|---------|----------|
| 1     | 5.304     | 19503880 | 3982112 | 99.085  | 98.683   |
| 2     | 5.489     | 180134   | 53153   | 0.915   | 1.317    |
| Total |           | 19684014 | 4035264 | 100.000 | 100.000  |
